# Supplementary material for: Chiral picolylamines for Michael and aldol reactions: probing substrate boundaries
Source: Royal Society of Chemistry journal article supplement (doi:10.1039/c2ob26382c), 2012-01-01

## Chiral Picolylamines for Michael and Aldol Reactions: Probing Substrate Boundaries

Thomas C. Nugent,<sup>\*,1</sup> Ahtaram Bibi,<sup>1,2</sup> Abdul Sadiq,<sup>1,3</sup> Mohammad Shoaib,<sup>1,3</sup> M. Naveed Umar,<sup>1,3</sup> Foad N. Tehrani<sup>1</sup>

<sup>1</sup> Department of Chemistry, School of Engineering and Science, Jacobs University Bremen, Campus Ring 1, 28759 Bremen, Germany

<sup>2</sup> Current address: Department of Chemistry, Kohat University of Science and Technology, Kohat 26000, Khyber Pakhtunkhwa, Pakistan

<sup>3</sup> Current address: Department of Chemistry and Department of Pharmacy, University of Malakand, Chakdara Lower Dir 18000, Khyber Pakhtunkhwa, Pakistan

### General information:

Reactions were performed in 2.0 mL screw cap vials. Liquid reagents were transferred with glass syringes. Routine monitoring of reactions were performed by thin-layer chromatography (TLC) using precoated plates of silica gel 60 F<sub>254</sub> and visualized under ultraviolet irradiation (254 nm) or ceric ammonium molybdate stain. Column chromatography separations were performed with silica gel 60 (0.040-0.063 mm). Petroleum ether with a boiling point range of 60-80 °C was used. Organic extracts were dried over anhydrous sodium sulfate.

### Instrumentation:

NMR spectra were recorded on a JEOL ECX 400 spectrometer, operating at 400 MHz (<sup>1</sup>H) and 100 MHz (<sup>13</sup>C) respectively. Chemical shifts (δ) were reported in parts per million (ppm) downfield from tetramethylsilane (TMS = 0) or relative to CHCl<sub>3</sub> (7.26 ppm) for <sup>1</sup>H NMR. Multiplicities are abbreviated as: (s = singlet, d = doublet, t = triplet, q = quartet, br = broad, m = multiplet). Coupling constants are expressed in Hz. FT-IR spectra were obtained on Nicolet Avatar 370 thermonicolet spectrometer. MS data was measured on a Bruker Daltonics HCT Ultra. HRMS were recorded on a Bruker micrOTOF instrument with an ionization potential of 70 eV with ESI positive mode. All chiral HPLC analysis was performed on a CHIRALCEL OD-H or CHIRALCEL AS-H column with HPLC grade *n*-heptane and *i*-propanol as the eluents.

## Catalyst Synthesis Details:

### PicAm-1 Catalyst Synthesis

The below experimental descriptions represent a significant optimization of our first reported synthesis of PicAm-1, as found in *Org. Biomol. Chem.* **2010**, 8, 4085-4089. The most critical improvement has been an optimization of the resolution of rac-PicAm-1. The procedures shown here should be used instead of the earlier reported ones..

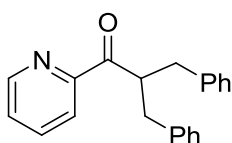

### Precursor ketone synthesis: 2-benzyl-3-phenyl-1-(pyridin-2-yl)propan-1-one.

To a 150 mL two neck round bottom flask was added NaH (4.0 equiv, 1.2 g, 48.0 mmol) in anhydrous toluene (40 mL), followed by the addition of 18-C-6 (0.1 equiv, 0.32 g, 1.2 mmol), and 2-acetyl pyridine (1.0 equiv, 1.35 mL, 12.0 mmol). This was stirred for 20 min and then benzyl bromide (2.5 equiv, 3.6 mL, 30 mmol) was added dropwise over 2-3 min. The reaction mixture was stirred at 50 °C for 5-6 h under an inert atmosphere. The reaction can be monitored by TLC or GC, but TLC is sufficient. The faint yellow reaction mixture was quenched by adding saturated NH<sub>4</sub>Cl (50 mL) at 25 °C. The reaction mixture was extracted with ethyl acetate. The combined organic layers were dried over sodium sulfate, filtered, and concentrated under low and high vacuum providing a yellow oil. Flash chromatography of the crude product, EtOAc/hexane (1:19), gave the desired ketone (2.65 g, 74% yield) as a white solid.

**TLC:** R<sub>f</sub> = 0.32 in EtOAc/hexane (1:9)

**GC:** Shimadzu GC-2010 instrument with a Rtx-5 amine column (Restec, 30m x 0.25mm); T<sub>inj</sub> = 300 °C and T<sub>det</sub> = 300 °C were always constant; 80 °C (hold 3 min), 250 °C (10 °C/min, then hold 10 min), 280 °C (20 °C/min, then hold for 3 min)

2-acetyl pyridine (starting material): retention time = 8.2 min

ketone product: retention time = 28.3 min.

**<sup>1</sup>H NMR** (400 MHz, CDCl<sub>3</sub>) (ppm): 2.77 (dd, *J* = 6.4 Hz, 13.7 Hz, 2H), 3.17 (dd, *J* = 7.7 Hz, 13.7 Hz, 2H), 4.81-4.88, (m, 1H), 7.08-7.41 (m, 10H), 7.69-7.73 (m 2H) 7.92 (d, *J* = 7.79 Hz, 1H), 8.62 (d, *J* = 4.12 Hz, 1H).

**<sup>13</sup>C NMR** (100 MHz, CDCl<sub>3</sub>) (ppm): 37.2, 47.9, 122.3, 125.9, 126.8, 128.1, 129.1, 136.6, 139.8, 148.8, 153.0, 203.5.

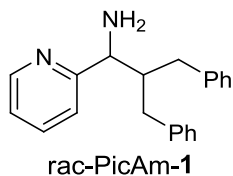

### Synthesis of racemic PicAm-1: 2-benzyl-3-phenyl-1-(pyridin-2-yl)propan-1-amine.

A mixture of hydroxylammonium chloride (3.0 equiv, 9.67 g, 139.2 mmol) and Et<sub>3</sub>N (3.0 equiv, 19.4 mL, 139.2 mmol) in EtOH (154 mL) were stirred at room temperature for 30 min. The above described ketone (1.0 equiv, 14.0 g, 46.4 mmol) was then added. After heating under reflux for 72 h, the reaction was monitored by TLC, approximately 95% of the starting ketone was consumed. The solvent was removed by rotary evaporation and the residue was extracted with EtOAc (150 mL x 3). The combined organic layers were washed with brine, dried over Na<sub>2</sub>SO<sub>4</sub>, and concentrated to give the crude oxime as a brown oil. Without further purification, the crude oxime (1.0 equiv, 13.5 g, 42.7 mmol) was added to EtOH (143 mL) with NH<sub>4</sub>OAc (1.3 equiv, 4.92 g, 64.0 mmol) and NH<sub>4</sub>OH (154.6 mL, 25% v/v in H<sub>2</sub>O). This solution was heated at reflux and zinc powder (5.0 equiv, 14.78 g, 213.0 mmol) was added portion wise over 2 h every 15 min. After refluxing for an additional 24 h, the reaction mixture was cooled to room temperature. The EtOH was removed by rotary evaporation and EtOAc was added. This heterogeneous mixture was Buchner funnel filtered with celite and the undissolved material was further treated with small portions of EtOAc to remove any remaining amine. The filtrate was treated with 1.0 N NaOH, the EtOAc was removed, and the basic aqueous was further extracted with EtOAc. The organic phases were combined, washed with brine, dried over Na<sub>2</sub>SO<sub>4</sub>, filtered, and concentrated. After column chromatography, first with EtOAc/pet ether (1:4), and then with 100 % EtOAc, and removal of the solvent, a pure viscous oil of racemic PicAm-1 (8.5 g, 60% yield) was obtained.

**HPLC:** Chiralcel OD-H, *i*-PrOH/heptane 5/95, flow rate = 1 mL/min,  $\lambda$  = 254 nm): *t*<sub>r</sub> = 10.2 min [(R)-PicAm-1], *t*<sub>r</sub> = 13.5 min [(S)-PicAm-1].

**<sup>1</sup>H NMR** (400 MHz, CDCl<sub>3</sub>) (ppm): 1.75 (br s, 2H), 2.46-2.54 (m, 2H), 2.58-2.66 (m, 2H), 2.70-2.78 (m, 1H), 4.00 (d, *J* = 3.9 Hz, 1H), 7.05-7.29 (m, 12H), 7.55-7.61 (m, 1H), 8.52-8.54 (m, 1H);

**<sup>13</sup>C NMR** (100 MHz, CDCl<sub>3</sub>) (ppm): 34.5, 36.8, 49.2, 56.69, 121.71, 125.73, 125.83, 125.94, 128.31, 128.45, 129.18, 129.24, 136.16, 141.14, 144.17, 148.7, 163.9.

### Resolution of Racemic PicAm-1

Racemic PicAm-1 was analyzed by HPLC (Chiralcel OD-H, *i*-PrOH/heptane 5/95, flow rate = 1 mL/min,  $\lambda$  = 254 nm): *t*<sub>r</sub> = 10.2 min [(R)-PicAm-1], *t*<sub>r</sub> = 13.5 min [(S)-PicAm-1], *i*-PrOH: Roth Art.-Nr. 7343.1, *n*-heptane: Roth.-Nr. 7337.1. Before beginning the resolution, the enantiomeric ratio was shown to be 50.1:49.9.

THF/CH<sub>3</sub>CN (72 mL, 1:5) was added to racemic free amine PicAm-1 (1.0 equiv, 8.05 g, 26.6 mmol) and the flask (250 mL) was heated to 75 °C. The mixture was stirred and natural tartaric acid, (*R,R*)-L-tartaric acid, (0.50 equiv, 1.99 g, 13.26 mmol) was added. The mixture was refluxed until the tartaric acid was fully dissolved, approximately 5 min.

The mixture was then cooled down to room temperature and the solvent was evaporated. The ensuing salt was high vacuum dried producing an off-white solid. This high vacuum drying step may be important because it possibly removes trace amounts of solvent that may have been trapped in the isolated racemic free amine of PicAm-1, which is a rather viscous oil.

The obtained salt was again dissolved in a mixture of THF/CH<sub>3</sub>CN (72 mL, 1:5) and the temperature was gently raised to reflux (75 °C). After another 15-20 min at gentle reflux, the salt fully dissolved and a transparent, slightly yellow, solution was observed. Oil bath heating was discontinued, and with the round bottom flask remained in the oil bath with continuous stirring, the solution cooled down to room temperature over approximately 45 min. Note, usually within minutes of discontinuation of heating, white solids start to crystallize out of solution. After stirring for an additional 3 h at room temperature the white precipitate was Buchner funnel filtered under vacuum and the resulting solid salt was air dried for several hours providing a white solid (5.7 g). The ratio of the two enantiomers for this material was 43:57 (HPLC).

The solid white salt (5.7 g) was dissolved in 25 mL of an EtOH (Sigma-Aldrich, cat. # 32205)/H<sub>2</sub>O (distilled water) [95:5 v/v] mixture. The solution was heated to 75 °C, and became homogeneous after approximately 10-15 min of stirring. Heating of the oil bath was discontinued, the round bottom flask remained in the oil bath, and under continuous stirring, the solution cooled down to room temperature over approximately 45 min. Note, at this stage, crystallization did not occur until the solution was close to room temperature. After stirring for an additional 3 h at room temperature the white precipitate was Buchner funnel filtered under vacuum and the resulting solid salt was air dried for several hours providing a white solid (3.7 g). The ratio of the two enantiomers was 30:70 (HPLC).

The above noted white salt (3.7 g) was again dissolved in EtOH/H<sub>2</sub>O (15 mL in total, 95:5), and after stirring at 75 °C (gentle reflux) for approximately 10 min., the solution became transparent and was colorless. The heater was turned off and once the solution was allowed to come to room temperature and then stirred for approximately 3 h at room temperature providing a white precipitate, which was Buchner funnel filtered under vacuum and air dried for several hours providing a white solid (2.5 g). The ratio of the two enantiomers was 11:89 (HPLC).

The above white salt (2.5 g) was dissolved in EtOH/H<sub>2</sub>O (20 mL in total, 95:5) by stirring at 75 °C under reflux and the solution became homogenous after 10 min. Note: for the prior recrystallization 15 mL of the solvent were used, but here we use 20 mL. The heater was turned off and once the solution was at room temperature, it stirred for approximately 3 h providing a white precipitate, which was Buchner funnel filtered under vacuum and air dried for several hours providing a white solid (1.5 g). The ratio of the two enantiomers was 2:98 (HPLC).

The above white salt (1.5 g) was dissolved in 15 mL of EtOH/H<sub>2</sub>O (95:5) by stirring at 75 °C under reflux, the solution became homogenous after 10 min. The heater was turned off

and after reaching room temperature (over 45 min), the stirring was continued for approximately 3 h. The precipitate was filtered, and air dried for several hours, providing a white solid salt (1.0 g). The ratio of the two enantiomers was 0.24:99.75 (HPLC).

After these five resolutions (one with THF/CH<sub>3</sub>CN and four with EtOH/H<sub>2</sub>O), high vacuum drying furnished the (*S*)-PicAm-1 salt as a white powder (~10% weight recovery from the beginning racemic PicAm-1 (8.05 g) and L-tartaric acid (1.99 g)). Thus, 1.0 g of ≥99% *ee* (*S*)-PicAm-1 was isolated, which represent an ~20% yield for the (*S*) enantiomer, when using natural tartaric acid: (*R,R*)-L-tartaric acid.

#### **(S)-PicAm-1 Salt Preparation (Catalyst for Reactions).**

Before use in reactions, the above salt (1.0 g) was first converted to the free amine by addition to EtOAc (75 mL) and NaOH (75 mL, 0.5 M). Further extraction (EtOAc, 30 mL x 2) of the basic aqueous layer, followed by combination of the organic extracts, drying (Na<sub>2</sub>SO<sub>4</sub>), filtration, concentration (rotary evaporator), and high vacuum drying until a constant weight was achieved, provided the free amine (*S*)-PicAm-1 (MW = 302.41) as a viscous clear oil (760 mg, 2.51 mmol, 19% yield from racemic material), this was dissolved in MeOH (30 mL) and 2,4-dinitrobenzenesulfonic acid (Sigma-Aldrich Cat # 556971, MW = 248.17, 1.00 equiv, 622.9 mg, 2.51 mmol) was added to form the 1:1 salt with (*S*)-PicAm-1. Important Note: 2,4-dinitrobenzenesulfonic acid is sold and described by Sigma-Aldrich as an unspecified hydrate, it is therefore clear that less than 1.0 equiv of the acid has been added for salt formation. Regardless, this is the procedure that should be used for salt formation. Further note that addition of more than 1.0 equiv of the acid is detrimental to the diastereoselectivity (product epimerization) of the aldol products in particular.

For clarity regarding the absolute stereochemistry of the catalyst described above, in the supporting information of our *Org. Biomol. Chem.* **2010**, 8, 4085-4089 paper, we demonstrated that when one uses unnatural (*S,S*)-D-tartaric acid, for the resolution, the (*R*)-PicAm-1 enantiomer, as judged by X-ray analysis of the salt (see Supp Info of *Org. Biomol. Chem.* **2010**, 8, 4085-4089), is obtained. Further note that the crystals used for the X-ray crystallographic analysis were that of a 1:1 (*S,S*)-D-tartaric acid/(*R*)-PicAm-1 salt. This was accomplished by taking the >99% *ee* PicAm-1 from the resolution, splitting this salt (which has an undefined stoichiometry) in EtOAc/NaOH (0.5 M), isolating the free amine, and then adding 1.0 equiv of (*S,S*)-D-tartaric acid. This 1:1 defined salt was used for crystal growth. As a consequence, the absolute configuration of the catalyst resolved here (see above) with L-tartaric acid provides the (*S*)-PicAm-1 catalyst. It should be further noted that for our first publication (*Org. Biomol. Chem.* **2010**, 8, 4085-4089) we mostly used the (*S*)-PicAm-1 catalyst.

## Procedure for Synthesis of PicAm-2

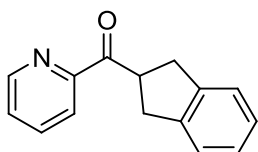

**Precursor ketone synthesis: 2,3-dihydro-1H-inden-2-yl(pyridin-2-yl)methanone.** To a 100 mL round bottom flask was added NaH (3.00 equiv, 0.72 g, 30 mmol) in anhydrous toluene (30 mL), followed by the addition of 18-C-6 (0.10 equiv, 0.264 gm, 1 mmol), acetyl pyridine (1.00 equiv, 1.12 g, 10 mmol). After stirring for 15 min,  $\alpha,\alpha$ -dibromoxylene (1.50 equiv, 3.96 g, 15 mmol) was added over 5 min. The reaction mixture was stirred at 45 °C, and after 12 h the reaction was complete (GC and TLC). The reaction mixture was quenched with H<sub>2</sub>O and extracted with EtOAc (3×20 mL). The combined organic layers were dried (anhydrous sodium sulfate), filtered, and concentrated under low vacuum, providing a yellow oil (crude product). The crude product was submitted to flash chromatography (EtOAc/hexane, 1:9) to give the desired precursor ketone **2** (51% yield, 1.12 g) as a yellow oil.

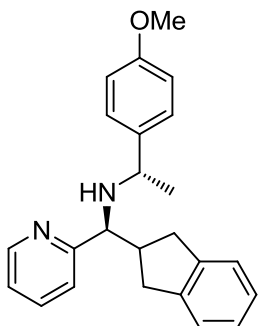

**Imine formation and reduction: (S)-N-((S)-(2,3-dihydro-1H-inden-2-yl)(pyridin-2-yl)methyl)-1-(4-methoxyphenyl)ethanamine.** To a glass vessel was added the above synthesized ketone (1.00 equiv, 1.12 g, 5.0 mmol), OMe- $\alpha$ -MBA (1.2 equiv, 0.89 mL, 6 mmol) and Ti(O*i*Pr)<sub>4</sub> (2.00 equiv, 2.98 mL, 10 mmol). The reaction mixture was stirred neat at 60 °C for 24 h under nitrogen. To this reaction mixture was added Pd/C (5 mol %) and isopropyl acetate (0.5 M), and this solution was pressurized with hydrogen (10 bars, 145 psi) at 60 °C. Conversion of the imine to the secondary amine product was evident after 36 h (GC analysis). The reaction was transferred to an Erlenmeyer flask with the aid of EtOAc (~70 mL) and then NaOH (~50 mL, 1.0 N) was added. It is important to rigorously stir this solution for about 1 h before filtration through a bed of celite (subsequently wash celite with EtOAc). Phase separation, and further extraction with EtOAc, followed by drying (Na<sub>2</sub>SO<sub>4</sub>) of the combined organic layers, filtration, and concentration under low and then high vacuum provided the crude product. GC analysis showed the crude product to have a 63:37 diastereomeric ratio. Slow chromatography eluting with 3% EtOAc/petroleum ether gave the major secondary amine product in 20% yield with a dr of 99.6: 0.4 by GC analysis (Shimadzu GC-2010 instrument with a



Rtx-5 amine column was used for reaction progress and diastereomeric excess measurements for this amine. Rtx-5 amine column (Restec, 30 m x 0.25 mm);  $T_{inj}$  = 300 °C and  $T_{det}$  = 300 °C, and carrier gas He @ 24 psi were always constant).

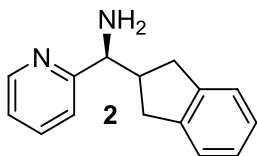

**PicAm-2 from secondary amine: (S)-(2,3-dihydro-1H-inden-2-yl)(pyridin-2-yl)methanamine (2).** To a round bottom flask (10 mL) was added the above synthesized secondary amine (1.00 equiv, 570 mg, 1.6 mmol) and anhydrous 1,2-dichloromethane (0.5 M), followed by NaI (0.50 equiv, 120 mg, 0.8 mmol) and boron trichloride (2.50 equiv, 360  $\mu$ L, 4.0 mmol). The reaction mixture was stirred at room temperature. [Note: this procedure is a modification of one reported earlier, here we added NaI and were successful with the reaction, without NaI the reaction provided very poor yields and more by-products. For the original method description, see: S. D. Boggs, J. D. Cobb, K. S. Gudmundsson, L. A. Jones, R. T. Matsuoka, A. Millar, D. E. Patterson, V. Samano, M. D. Trone, S. Xie, X.-M. Zhou, *Org. Process Res. Dev.* **2007**, *11*, 539 – 545.] The progress of the reaction was monitored by GC analysis and full conversion of starting material into product was observed within 21 h. Aqueous NaOH (1.0 N) was added and separatory funnel separation and further extraction with 1,2-dichloromethane (3 x 15 mL), followed by drying ( $\text{Na}_2\text{SO}_4$ ) of the combined organic extracts and concentration, low and then high vacuum, gave the crude product. Flash chromatography, eluting with 30% EtOAc in petroleum ether and then with 10% MeOH in  $\text{CH}_2\text{Cl}_2$  gave the desired primary free amine, PicAm-2, as a brown oil 98% yield (350 mg) in >99% *ee* (see below for *ee* determination).

$^1\text{H}$  NMR (400 MHz,  $\text{CDCl}_3$ ) (ppm): 2.11 (bs, 2H), 2.66-2.68 (m, 2H), 2.85-2.99 (m, 2H), 3.12-3.18 (m, 1H), 4.01 (d,  $J$  = 7.6 Hz, 1H), 7.09-7.14 (m, 3H), 7.19-7.22 (m, 2H), 7.28 (d,  $J$  = 7.8 Hz, 1H), 7.65-7.70 (m, 1H), 8.59 (d,  $J$  = 4.2 Hz, 1H).

$^{13}\text{C}$  NMR (100 MHz,  $\text{CDCl}_3$ ) (ppm): 36.3, 36.4, 46.6, 60.8, 124.3, 124.5, 126.2, 126.3, 136.8, 142.5, 142.6, 149.3, 161.9; FT-IR: (KBr)  $\nu_{\text{max}}$ : 1168, 1542, 2851, 2859, 3356, 3382  $\text{cm}^{-1}$ ; MS (EI),  $m/z$  (relative intensity): 225  $[\text{M}+\text{H}]^+$ ; HRMS (ESI-TOF) calculated for  $\text{C}_{15}\text{H}_{17}\text{N}_2$   $[\text{M}+\text{H}]^+$  is 225.1386; found: 225.1392.

#### Ee determination for PicAm-2:

In a pressure vessel (glass) was added anhydrous  $\text{CH}_2\text{Cl}_2$  (2.0 mL). Note: for reasons that are not currently clear, it appears to be important to perform this reaction in a sealed vessel. Add PicAm-2 (1.0 equiv, 1.0 mmol), triethylamine (7.0 equiv, 7.0 mmol) and trifluoroacetic anhydride (4.0 equiv). Stir in the sealed vessel for 15 h at room temperature. Work-up: add saturated aqueous  $\text{Na}_2\text{CO}_3$  and more  $\text{CH}_2\text{Cl}_2$  and stir for 30 min. Extract with  $\text{CH}_2\text{Cl}_2$  (2x30 mL) and dry with the combined organic layers with anhydrous  $\text{Na}_2\text{SO}_4$ . Concentrate the extracts and purify the crude reaction product using silica gel chromatography (EtOAc and petroleum ether). The *ee* of the diamine was found to be >99% and determined using chiral HPLC (Chiralcel AS-H, *i*-propanol/heptane 5/95, flow rate = 0.4 mL/min,  $\lambda$  = 210 nm):<sup>1</sup>  $t_{\text{major}}$  = 24.5 min,  $t_{\text{minor}}$  = 27.5 min.

### PicAm-3 Synthesis (previously reported, see citations within the manuscript)

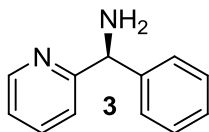

**(S)-phenyl(pyridin-2-yl)methanamine (PicAm-3).** The product was obtained as brown oil in enantiopure form with >99% *ee*. The *ee* was determined by Chiral HPLC (Chiralcel OD-H, *i*-propanol/heptane 2/98, flow rate = 0.5 mL/min,  $\lambda$  = 210 nm):  $t_{\text{major}}$  = 55.6 min,  $t_{\text{minor}}$  = 60.9 min;  $[\alpha]_{\text{D}}^{22}$  +63.6 (*c* 1.9, CHCl<sub>3</sub>). The previously reported optical rotation was  $[\alpha]_{\text{D}}^{20}$  +67.1 (*c* 1.9, CHCl<sub>3</sub>) which was determined to be the (S) enantiomer, see: G. Alvaro, G. Martelli, D. Savoia, *J. Chem. Soc. Perkin Trans. 1*. **1998**, 4, 775-784.

<sup>1</sup>H NMR (400 MHz, CDCl<sub>3</sub>) (ppm): 2.17 (bs, 2H), 5.20 (s, 1H), 7.07-7.11 (m, 1H), 7.19-7.31 (m, 4H), 7.39-7.41 (m, 2H), 7.53-7.58 (m, 1H), 8.55 (d, *J* = 4.3 Hz, 1H).

### Michael Section (carbonyl additions to unsaturated nitrocompounds)

#### General Procedure for synthesizing the racemic Michael adducts with cyclopentanone.

To a mixture of nitroolefin (1.00 equiv) and 2-picolyamine (20 mol %) in the presence of 2,4-dinitrobenzenesulfonic acid hydrate (10 mol %) in chloroform (0.5 M) was added cyclopentanone (20.0 equiv). The reaction was stirred at room temperature and monitored by TLC. At maximum conversion the reaction was quenched with 1.0 N HCl, extracted with dichloromethane and the combined organics dried under reduced pressure. The crude product was purified by column chromatography on silica gel (Pet Ether/EtOAc, 95:5, with slowly increasing polarity as needed).

#### General procedure for synthesis of racemic Michael adducts (aldehydes).

To a mixture of the nitroolefin (1.00 equiv) and aldehyde (20.0 equiv) in chloroform (0.5 M) was added glycine (15 mol %) and dimethylaminopyridine (15 mol %). The reaction was stirred at room temperature and monitored by TLC. At maximum conversion the reaction mixture was filtered, and the solution was concentrated reduced pressure and subsequently purify by column chromatography.

#### General procedure for enantioselective Michael reactions.

To a mixture of the nitroolefin (1.00 equiv), PicAm catalyst (free amine, 10 mol% unless otherwise stated) in the presence of dodecylbenzenesulfonic acid sodium salt (10 mol%), and 2,4-dinitrobenzene sulfonic acid hydrate (2.5 mol%) in chloroform (2.0 M) was added the ketone or aldehyde (5.00 equiv). The reactions were performed at room temperature and monitored by HPLC and/or TLC. At the indicated reaction time (Tables in manuscript text) the reaction was concentrated (low vacuum, then short exposure to high vacuum) and the resulting crude Michael product was purified by column chromatography. For all products, the yield, dr, and ee are given below. Note: PicAm-3 overlaps with  $\beta$ -nitrostyrene in the HPLC. We tried working up the crude reaction material with dilute HCl to remove the catalyst, but in our hands this was not completely



successful and thus we did not use an acid work-up. For the new Michael compounds identified here, **4b-d**, we assumed that the same stereochemical trend prevails as found in **4a**.

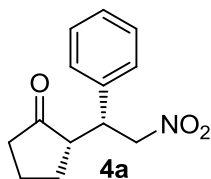

**(S)-2-((R)-2-nitro-1-phenylethyl)cyclopentanone (4a).** White solid, 76% isolated yield, *syn/anti* = 81/19, 87 % *ee* (*syn*).

The *ee* was determined by two different methods:

Method A: [Reported method (REF)] The *ee* was determined by chiral HPLC (Chiralcel AS-H, *i*-propanol/hexane 25/75, flow rate = 1.0 mL/min,  $\lambda$  = 210 nm):  $t_{\text{major}}$  = 16.7 min,  $t_{\text{minor}}$  = 10.7 min

Method B: The *ee* was determined by chiral HPLC (Chiralcel OD-H, *i*-propanol/heptane 5/95, flow rate = 1.0 mL/min,  $\lambda$  = 210 nm):  $t_{\text{major}}$  = 24.1 min,  $t_{\text{minor}}$  = 31.7 min.

$R_f$  = 0.37 EtOAc/pet ether (1:4).

$^1\text{H}$  NMR (400 MHz,  $\text{CDCl}_3$ ) (ppm) (major diastereomer): 1.43-1.54 (m, 2H), 1.61-1.76 (m, 1H), 1.82-1.96 (m, 2H), 2.06-2.18 (m, 1H), 2.31-2.43 (m, 2H), 3.66-3.73 (m, 1H), 4.73 (dd,  $J$  = 10.0, 12.9 Hz, 1H), 5.35 (dd,  $J$  = 5.6, 12.9 Hz, 1H), 7.15-7.20 (m, 2H), 7.24-7.34 (m, 3H).

Y. Xiong, Y. Wen, F. Wang, B. Gao, X. Liu, X. Huang, X. Fenga, *Adv. Synth. Catal.* **2007**, 349, 2156-2166.

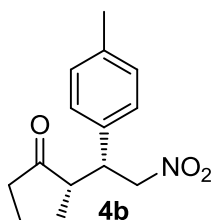

**(S)-2-((R)-2-nitro-1-p-tolyethyl)cyclopentanone (4b).** Yellow oil, 92% isolated yield, *syn/anti* = 76/24, 88 % *ee* (*syn*), >99 % *ee* (*anti*). The *ee* was determined by chiral HPLC (Chiralcel OD-H, *i*-propanol/heptane 15/85, flow rate = 1.0 mL/min,  $\lambda$  = 190 nm):  $t_{\text{minor}}$  (*anti*) = 9.2 min,  $t_{\text{major}}$  (*syn*) = 9.7 min,  $t_{\text{minor}}$  (*syn*) = 11.4 min,  $t_{\text{major}}$  (*anti*) = 15.4 min,  $R_f$  = 0.41 EtOAc/pet ether (1:4).

$^1\text{H}$  NMR (400 MHz,  $\text{CDCl}_3$ ) (ppm) (major diastereomer): 1.42-1.53 (m, 1H), 1.58-1.77 (m, 2H), 1.83-1.93 (m, 2H), 2.07-2.16 (m, 1H), 2.31 (s, 3H), 2.30-2.40 (m, 1H), 3.63-3.69 (m, 1H), 4.70 (dd,  $J$  = 10.0, 12.8 Hz, 1H), 5.31 (dd,  $J$  = 12.8, 5.6 Hz, 1H), 7.03-7.07 (m, 2H), 7.10-7.12 (m, 2H).

V. G. Saraswathy, S. Sankararaman, *J. Org. Chem.* **1995**, 60, 5024-5028.

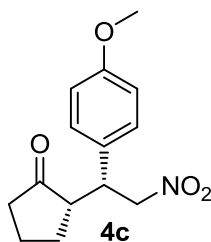

**(S)-2-((R)-1-(4-methoxyphenyl)-2-nitroethyl)cyclopentanone (4c).** Yellowish solid, 85% isolated yield, *syn/anti* = 88/12, 77 % *ee* (*syn*). The *ee* was determined by chiral HPLC (Chiralcel OD-H, *i*-propanol/heptane 20/80, flow rate = 1.0 mL/min,  $\lambda$  = 190 nm):  $t_{\text{major}}$  = 15.0 min,  $t_{\text{minor}}$  = 16.6 min,  $R_f$  = 0.29 EtOAc/pet ether (1:4).

$^1\text{H}$  NMR (400 MHz,  $\text{CDCl}_3$ ) (ppm) (major diastereomer): 1.44-1.54 (m, 1H), 1.64-1.76 (m, 1H), 1.85-1.96 (m, 2H), 2.07-2.16 (m, 1H), 2.31-2.39 (m, 2H), 3.63-3.69 (m, 1H), 3.78 (s, 3H), 4.68 (dd,  $J$  = 10.0, 12.6 Hz, 1H), 5.29 (dd,  $J$  = 5.6, 12.6), 6.84 (d,  $J$  = 8.7 Hz, 2H), 7.08 (d,  $J$  = 8.7 Hz, 2H).

M. C. Moorjani, g. K. Trivedi, *Ind. J. Chem.* **1978**, 16B, 405.

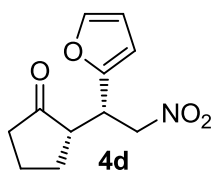

**(S)-2-((S)-1-(furan-2-yl)-2-nitroethyl)cyclopentanone (4d).** Dark yellow oil, 89% yield, *syn/anti* = 57/43, 81 % *ee* (*syn*). The *ee* was determined by chiral HPLC (Chiralcel AS-H, *i*-propanol/heptane 10/90, flow rate = 0.5 mL/min,  $\lambda$  = 230 nm):  $t_{\text{minor}}$  = 37.6 min,  $t_{\text{major}}$  = 67.5 min,  $R_f$  = 0.30 EtOAc/pet ether (1:4).

$^1\text{H}$  NMR (400 MHz,  $\text{CDCl}_3$ ) (ppm) (major diastereomer): 1.51-1.61 (m, 1H), 1.67-1.78 (m, 1H), 1.89-1.95 (m, 1H), 2.00-2.14 (m, 2H), 2.29-2.43 (m, 1H), 3.95-4.02 (m, 1H), 4.78 (dd,  $J$  = 9.2, 12.9 Hz, 1H), 5.06 (dd,  $J$  = 6.2, 12.9 Hz, 1H), 6.13 (d, 3.24 Hz, 1H), 6.28-6.29 (m, 1H), 7.33 (s, 1H).

$^{13}\text{C}$  NMR (100MHz,  $\text{CDCl}_3$ ) (ppm) (major diastereomer): 20.2, 27.0, 37.7, 38.3, 49.5, 75.9, 108.8, 110.4, 142.4, 150.6, 217.9.

FT-IR: (KBr)  $\nu_{\text{max}}$ : 3122, 2968, 2882, 1729, 1378, 1150, 1013, 917, 817, 742, 599  $\text{cm}^{-1}$ .

MS (EI),  $m/z$  (relative intensity): 246  $[\text{M}+\text{Na}]^+$ ; HRMS (ESI-TOF) calculated for  $\text{C}_{11}\text{H}_{13}\text{NO}_4$   $[\text{M}+\text{Na}]^+$  246.0742; found: 246.0739.

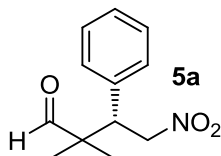

**(S)-2,2-dimethyl-4-nitro-3-phenylbutanal (5a).** Clear oil, 58% isolated yield, 78 % *ee*. The *ee* was determined by chiral HPLC (Chiralcel OD-H, *i*-propanol/heptane 8/92, flow rate = 1 mL/min,  $\lambda$  = 210 nm),  $t_{\text{minor}}$  = 21.1 min,  $t_{\text{major}}$  = 33.7 min,  $R_f$  = 0.38 EtOAc/pet ether (1:4).

$^1\text{H}$  NMR (400 MHz,  $\text{CDCl}_3$ ) (ppm): 1.00 (s, 3H), 1.13 (s, 3H), 3.78 (dd,  $J$  = 4.2, 11.3 Hz, 1H), 4.69 (dd,  $J$  = 4.2, 13.1 Hz, 1H), 4.86 (dd,  $J$  = 11.3, 13.1 Hz, 1H), 7.16-7.21 (m, 2H), 7.27-7.35 (m, 3H), 9.52 (s, 1H).

REF: S. H. McCooley, S. J. Connon, *Org. Lett.* **2007**, 9, 599-602.

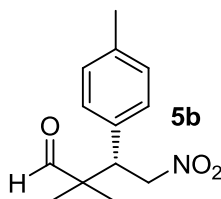

**(S)-2,2-dimethyl-4-nitro-3-p-tolylbutanal (5b).** Yellow oil, 53% isolated yield, 80 % *ee*. The *ee* was determined by chiral HPLC (Chiralcel OD-H, *i*-propanol/heptane 20/80, flow rate = 1 mL/min,  $\lambda$  = 215 nm),  $t_{\text{minor}}$  = 12.0 min,  $t_{\text{major}}$  = 16.7 min,  $R_f$  = 0.39 EtOAc/pet ether (1:4).

$^1\text{H}$  NMR (400 MHz,  $\text{CDCl}_3$ ) (ppm): 1.00 (s, 3H), 1.12 (s, 3H), 2.32 (s, 3H), 3.74 (dd,  $J$  = 4.2, 11.3 Hz, 1H), 4.66 (dd,  $J$  = 4.2, 13.3 Hz, 1H), 4.83 (dd,  $J$  = 11.3, 13.3 Hz, 1H), 7.07 (d,  $J$  = 8.1 Hz, 2H), 7.13 (d,  $J$  = 8.0 Hz, 2H), 9.52 (s, 1H).

W. Wang, J. Wang, H. Li, *Angew. Chem. Int. Ed.* **2005**, 44, 1369-1371.

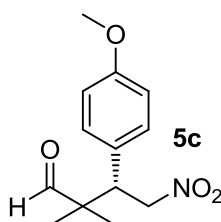

**(S)-3-(4-methoxyphenyl)-2,2-dimethyl-4-nitrobutanal (5c).** Colourless solid, 59% isolated yield, 90 % *ee*. The *ee* was determined by chiral HPLC (Chiralcel OD-H, *i*-propanol/heptane 10/90, flow rate = 1 mL/min,  $\lambda$  = 210 nm),  $t_{\text{minor}}$  = 13.3 min,  $t_{\text{major}}$  = 18.2 min,  $R_f$  = 0.33 EtOAc/ pet ether (1:4).

$^1\text{H}$  NMR (400 MHz,  $\text{CDCl}_3$ ) (ppm): 0.99 (s, 3H), 1.11 (s, 3H), 3.78 (s, 3H), 3.73 (dd,  $J$  = 4.2, 11.5 Hz, 1H), 4.66 (dd,  $J$  = 4.3, 12.9 Hz, 1H), 4.80 (dd,  $J$  = 11.5, 12.8 Hz, 1H), 6.85 (d,  $J$  = 8.8 Hz, 2H), 7.11 (d,  $J$  = 8.7 Hz, 2H), 9.51 (s, 1H).

X.-J. Zhang, S.-P. Liu, X.-M. Li, M. Yan, A. S. C. Chan, *Chem. Commun.* **2009**, 7, 833-835.

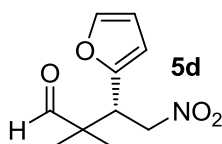

**(S)-3-(furan-2-yl)-2,2-dimethyl-4-nitrobutanal (5d).** Yellow oil, 70% isolated yield, 90 % *ee*. The *ee* was determined by chiral HPLC (Chiralcel OD-H, *i*-propanol/heptane 25/75, flow rate = 0.8 mL/min,  $\lambda$  = 190 nm),  $t_{\text{minor}}$  = 12.3 min,  $t_{\text{major}}$  = 18.1 min,  $R_f$  = 0.34 EtOAc/pet ether (1:4).

$^1\text{H}$  NMR (400 MHz,  $\text{CDCl}_3$ ) (ppm): 1.05 (s, 3H), 1.18 (s, 3H), 3.92 (dd,  $J$  = 3.9, 11.1 Hz, 1H), 4.59 (dd,  $J$  = 4.0, 12.9 Hz, 1H), 4.76 (dd,  $J$  = 11.1, 12.9 Hz, 1H), 6.22 (d,  $J$  = 3.24 Hz, 1H), 6.31-6.32 (m, 1H), 7.37 (d,  $J$  = 1.75 Hz, 1H), 9.52 (s, 1H).

S. H. McCooney, S. J. Connon, *Org. Lett.* **2007**, 9, 599-602.

## Aldol Section (carbonyl additions to aromatic aldehydes)

### General Procedure for Racemic Aldol product

To a solution of water/methanol (4 mL, 1:1), picolylamine (0.4 mmol), and ketone (6.5 mmol), was added the aldehyde (2 mmol). Depending on the substrate, the reaction was stirred at room temperature for a 12-24 h period. The reaction was monitored by TLC, and in most instances the starting material was fully consumed. The reactions were quenched by the addition of saturated aqueous  $\text{NH}_4\text{Cl}$  (20-25 mL) and the resulting mixture was extracted 3x with ethyl acetate (25 mL). The combined organic layers were dried over anhydrous sodium sulfate, evaporated, and filtered to obtain the crude aldol product. Column chromatography on silica gel using 5-10% ethyl acetate-hexane provided the pure aldol products.

### General Procedure for Enantioselective Aldol Reaction

The (*S*)-PicAm-1/2,4-dinitrobenzenesulfonic acid 1:1 salt (MW = 550.58) was added (0.035 mmol, 7.0 mol%) to a mixture of the aldehyde (0.5 mmol, 1.0 equiv) and ketone (1.65 mmol, 3.3 equiv) in distilled water (1.0 mL), and the reaction mixture was stirred at 45 °C for the specified reaction time period. Note, all aldol products reported here were obtained by using 7 mol% of the catalyst and 3.3 equiv of the ketone donor, and extended reactions can lead to epimerization of the product. Work-up involved simply adding EtOAc and extracting with this solvent. The organic layers were collected and concentrated (no drying agent was used), and the  $^1\text{H}$  NMR and HPLC of the crude product were recorded. The crude sample was then purified by chromatography (petroleum ether/EtOAc) for yield and *ee* assessment. Relative and absolute configurations of the products were determined by comparison with the known  $^1\text{H}$  NMR data and chiral HPLC traces. For new aldol compound identified here, **9c**, we assumed that the same stereochemical trend prevails.

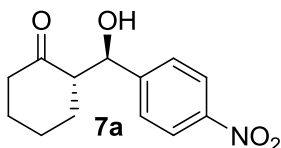

**(S)-2-((R)-hydroxy(4-nitrophenyl)methyl)cyclohexanone (7a).**

The reaction media was brine.

Reaction time: 16 h; The crude product was purified by flash column chromatography (EtOAc/pet ether = 10:90); yield: 92%; The *ee* was determined by chiral HPLC (Chiralcel OD-H, *i*-PrOH/heptane 5/95, flow rate = 1 mL/min,  $\lambda$  = 210 nm):  $t_{\text{major}}$  = 24.2 min,  $t_{\text{minor}}$  = 36.5 min, *ee* = 99%, *dr* = 22:1 (*anti/syn*).  $R_f$  = 0.29, 40% EtOAc/pet ether.

<sup>1</sup>H NMR (400 MHz, CDCl<sub>3</sub>) (ppm) (major diastereomer): 1.36-1.44 (m, 1H), 1.55-1.72 (m, 3H), 1.80-1.88 (m, 1H), 2.09-2.16 (m, 1H), 2.33-2.41 (m, 1H), 2.47-2.52 (m, 1H), 2.56-2.64 (m, 1H), 4.12 (s, 1H), 4.91 (d, *J* = 8.4 Hz, 1H), 7.52 (d, *J* = 8.6 Hz, 2H), 8.21 (d, *J* = 8.6 Hz, 2H).

N. Mase, Y. Nakai, N. Ohara, H. Yoda, K. Takabe, F. Tanaka, C. F. Barbas III, *J. Am. Chem. Soc.* **2006**, 128, 734-735.

T. Miura, K. Imai, M. Ina, N. Tada, N. Imai, A. Itoh, *Org. Lett.* **2010**, 12, 1620-1623.

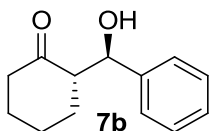

**(S)-2-((R)-hydroxy(phenyl)methyl)cyclohexanone (7b).**

Reaction time: 9 h; The crude product was purified by flash column chromatography (EtOAc/pet ether = 7:93); yield: 50%; The *ee* was determined by chiral HPLC (Chiralcel OD-H, *i*-PrOH/heptane 5/95, flow rate = 0.5 mL/min,  $\lambda$  = 210 nm):  $t_{\text{major}}$  = 23.2 min,  $t_{\text{minor}}$  = 39.0 min, *ee* = 96%, *dr* = 6:1 (*anti/syn*),  $R_f$  = 0.27, 20% EtOAc/pet ether.

<sup>1</sup>H NMR (400 MHz, CDCl<sub>3</sub>) (ppm) (major diastereomer): 1.47-1.60 (m, 3H), 1.64-1.70 (m, 1H), 1.74-1.80 (m, 1H), 2.05-2.12 (m, 1H), 2.32-2.40 (m, 1H), 2.46-2.50 (m, 1H), 2.58-2.66 (m, 1H), 3.96 (s, 1H), 4.79 (d, *J* = 8.8 Hz, 1H), 7.26-7.35 (m, 5H).

Y. Hayashi, T. Sumiya, J. Takahashi, H. Gotoh, T. Urushima, M. Shoji, *Angew. Chem. Int. Ed.* **2006**, 45, 958-961.

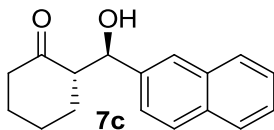

**(S)-2-((R)-hydroxy(naphthalen-3-yl)methyl)cyclohexanone (7c).**

Reaction time: 14 h; The crude product was purified by flash column chromatography (EtOAc/pet ether = 10:90); yield: 85%; The *ee* was determined by HPLC analysis (Chiralcel OD-H, *i*-PrOH/heptane 10/90, flow rate = 1 mL/min,  $\lambda$  = 210 nm):  $t_{\text{major}}$  = 17.8 min,  $t_{\text{minor}}$  = 19.9 min, *ee* = 96%; *dr* = 34:1 (*anti/syn*);

<sup>1</sup>H NMR (400 MHz, CDCl<sub>3</sub>) (ppm) (major diastereomer): 1.30-1.36 (m, 1H), 1.47-1.52 (m, 1H), 1.54-1.57 (m, 1H), 1.63-1.70 (m, 1H), 1.73-1.78 (m, 1H), 2.06-2.12 (m, 1H),

2.34-2.43 (m, 1H), 2.48-2.54 (m, 1H), 2.69-2.76 (m, 1H), 4.06 (d,  $J = 2.6$  Hz, 1H), 4.97 (dd,  $J = 2.6, 8.8$  Hz, 1H), 7.45-7.50 (m, 3H), 7.76 (s, 1H), 7.82-7.86 (m, 3H).

X. Wu, Z. Jiang, H.-M. Shen, Y. Lu, *Adv. Synth. Catal.* **2007**, *349*, 812-816.

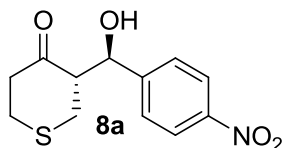

**(S)-tetrahydro-3-((R)-hydroxy(4-nitrophenyl)methyl)thiopyran-4-one (8a).**

Reaction time: 16 h; The crude product was purified by flash column chromatography (EtOAc/pet ether = 10:90); yield: 92%; The *ee* was determined by chiral HPLC (Chiralcel AS-H, *i*-PrOH/heptane 10/90, flow rate = 1 mL/min,  $\lambda = 210$  nm):  $t_{\text{major}} = 40.9$  min,  $t_{\text{minor}} = 55.8$  min, *ee* = 98%, *dr* = 20:1 (*anti/syn*),  $R_f = 0.37$ , 40 % EtOAc/pet ether.

$^1\text{H}$  NMR (400 MHz,  $\text{CDCl}_3$ ) (ppm) (major diastereomer): 2.51-2.56 (m, 1H), 2.63-2.70 (m, 1H), 2.77-2.85 (m, 2H), 2.93-3.06 (m, 3H), 5.07 (d,  $J = 8.1$  Hz, 1H), 7.54 (d,  $J = 8.6$  Hz, 2H), 8.22 (d,  $J = 8.7$  Hz, 2H).

In this reference the authors used the chiralpak AD column: J. Chen, X. Li, X. Xing, W. Xiao, *J. Org. Chem.* **2006**, *71*, 8198-8202.

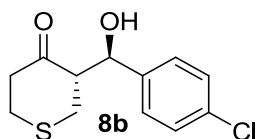

**(S)-3-((R)-(4-chlorophenyl)(hydroxy)methyl)-tetrahydrothiopyran-4-one (8b)**

Reaction time: 20 h; The crude product was purified by flash column chromatography (EtOAc/pet ether = 10:90); yield: 90%; The *ee* was determined by chiral HPLC (Chiralcel OD-H, *i*-PrOH/heptane 5/95, flow rate = 1 mL/min,  $\lambda = 210$  nm):  $t_{\text{major}} = 21.2$  min,  $t_{\text{minor}} = 26.2$  min, *ee* =  $\geq 99\%$ , *dr* = 15:1 (*anti/syn*),  $R_f = 0.30$ , 30% EtOAc/pet ether.

$^1\text{H}$  NMR (400 MHz,  $\text{CDCl}_3$ ) (ppm) (major diastereomer): 2.47-2.60 (m, 2H), 2.73-2.87 (m, 2H), 2.93-3.02 (m, 3H), 3.46 (s, 1H), 4.94 (d,  $J = 8.5$  Hz, 1H), 7.25-7.30 (m, 2H), 7.32-7.36 (m, 2H).

B. Rodriguez, A. Bruckmann, C. Bolm, *Chem. Eur. J.* **2007**, *13*, 4710-4722.

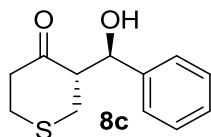

**(S)-tetrahydro-3-((R)-hydroxy(phenyl)methyl)thiopyran-4-one (8c).**

Reaction time: 26 h; The crude product was purified by flash column chromatography (EtOAc/pet ether = 10:90); yield: 40%; The *ee* was determined by chiral HPLC (Chiralcel OD-H, *i*-PrOH/heptane 5/95, flow rate = 1 mL/min,  $\lambda = 210$  nm):  $t_{\text{major}} = 19.5$  min,  $t_{\text{minor}} = 27.8$  min, *ee* = 95%, *dr* = 17:1 (*anti/syn*),  $R_f = 0.46$ , 40% EtOAc/pet ether.



$^1\text{H}$  NMR (400 MHz,  $\text{CDCl}_3$ ) (ppm) (major diastereomer): 2.47-2.59 (m, 2H), 2.73-2.89 (m, 2H), 2.95-3.04 (m, 3H), 3.40 (s, 1H), 4.97 (d,  $J = 8.8$  Hz, 1H), 7.30-7.39 (m, 5H). V. Maya, M. Raj, V. K. Singh, *Org. Lett.* **2007**, 9, 2593-2595.

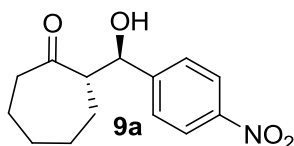

**(S)-2-((R)-hydroxy(4-nitrophenyl)methyl)cycloheptanone (9a).**

Reaction time: 24 h; The crude product was purified by flash column chromatography (EtOAc/pet ether = 7:93); yield: 94%; The *ee* was determined by chiral HPLC (Chiralcel AS-H, *i*-PrOH/heptane 5/95, flow rate = 0.5 mL/min,  $\lambda = 254$  nm):  $t_{\text{major}} = 32.6$  min,  $t_{\text{minor}} = 35.1$  min, *ee* = 96%, *dr* = 5:1 (*anti/syn*),  $R_f = 0.27$ , 20% EtOAc/pet ether.

$^1\text{H}$  NMR (400 MHz,  $\text{CDCl}_3$ ) (ppm) (major diastereomer): 1.28-1.41 (m, 3H), 1.56-1.89 (m, 5H), 2.43-2.57 (m, 3H), 2.96-3.01 (m, 1H), 3.80 (s, 1H), 4.92 (d,  $J = 7.5$  Hz, 1H), 7.53 (d,  $J = 8.5$  Hz, 2H), 8.21 (d,  $J = 8.5$  Hz, 2H).

Y. Wu, Y. Zhang, M. Yu, G. Zhao, S. Wang, *Org. Lett.* **2006**, 8, 4417-4420.

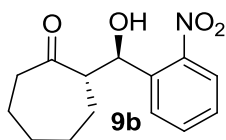

**(S)-2-((R)-hydroxy(2-nitrophenyl)methyl)cycloheptanone (9b).**

Reaction time: 30 h, The crude product was purified by flash column chromatography (EtOAc/pet ether = 8:92); yield: 85%; The *ee* was determined by chiral HPLC (Chiralcel AS-H, *i*-PrOH/heptane 5/95, flow rate = 0.5 mL/min,  $\lambda = 254$  nm):  $t_{\text{major}} = 31.4$  min,  $t_{\text{minor}} = 27.1$  min, *ee* = 94%, *dr* = 15:1 (*anti/syn*),  $R_f = 0.30$ , 20% EtOAc/pet ether.

The absolute stereochemistry of aldol product **9b** (Table 4, entry 8) was determined by comparison of the HPLC data reported by Córdova [G. Ma, A. Bartoszewicz, I. Ibrahim, A. Córdova, *Adv. Synth. Catal.* **2011**, 353, 3114 – 3122]. He used the AS HPLC column to separate the enantiomers of product **9b**. We used the AS-H HPLC column to separate the enantiomers of product **9b** and obtained the same retention time trend for the major and minor enantiomers as reported by Córdova. It is our understanding that the ‘hyphen H’ implies that column particle size is smaller resulting in greater resolution capabilities for the AS-H column verses the AS column. For a related discussion, regarding the OD and OD-H HPLC columns, see: F. Wang, T. Dowling, D. Ellison, J. Wyvratt, *J. Chromatography A*, **2004**, 1034, 117-123.

$^1\text{H}$  NMR (400 MHz,  $\text{CDCl}_3$ ) (ppm) (major diastereomer): 1.26-1.33 (m, 1H), 1.40-1.49 (m, 1H), 1.58-1.70 (m, 2H), 1.76-1.91 (m, 4H), 2.46-2.49 (m, 2H), 3.08-3.13 (m, 1H), 4.28 (s, 1H), 5.44 (d,  $J = 5.8$  Hz, 1H), 7.41-7.45 (m, 1H), 7.62-7.66 (m, 1H), 7.71-7.74 (m, 1H), 7.89-7.91 (m, 1H);  $^{13}\text{C}$  NMR (100 MHz,  $\text{CDCl}_3$ ) (ppm): 23.52, 28.53, 28.75, 29.35, 44.17, 56.60, 71.42, 124.34, 128.36, 129.02, 133.25, 137.59, 148.45, 217.60; FT-

IR: (KBr)  $\nu_{\max}$ : 3436, 2928, 1697, 1525, 1347,  $\text{cm}^{-1}$ ; MS (EI),  $m/z$  (relative intensity): 264  $[\text{M}+\text{H}]^+$ ; HRMS (ESI-TOF) calculated for  $\text{C}_{20}\text{H}_{29}\text{NO}_4$  ( $\text{M}+\text{Na}^+$ ): 286.1055, found 286.1054.

G. Ma, A. Bartoszewicz, I. Ibrahim, A. Córdova, *Adv. Synth. Catal.* **2011**, 353, 3114–3122.

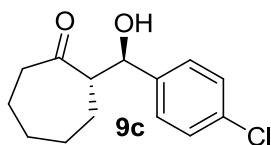

**(S)-2-((R)-(4-chlorophenyl)(hydroxy)methyl)cycloheptanone (9c).**

Reaction time: 30 h, The crude product was purified by flash column chromatography (EtOAc/pet ether = 8:92): yield: 86%; The *ee* was determined by chiral HPLC (Chiralcel AS-H, *i*-PrOH/heptane 15/85, flow rate = 0.5 mL/min,  $\lambda$  = 254 nm):  $t_{\text{major}}$  = 23.5 min,  $t_{\text{minor}}$  = 25.1 min, *ee* = 90%, *dr* = 4:1 (*anti/syn*),  $R_f$  = 0.32, 20% EtOAc/pet ether.

$^1\text{H}$  NMR (400 MHz,  $\text{CDCl}_3$ ) (ppm) (major diastereomer): 1.25-1.33 (m, 3H), 1.52-1.55 (m, 1H), 1.65-1.78 (m, 2H), 1.85-1.87 (m, 2H), 2.45-2.60 (m, 2H), 2.91-2.96 (m, 1H), 3.36 (s, 1H), 4.79 (d,  $J$  = 8.1 Hz, 1H), 7.26-7.34 (m, 4H);  $^{13}\text{C}$  NMR (100 MHz,  $\text{CDCl}_3$ ) (ppm): 23.57, 28.03, 28.64, 28.72, 44.04, 58.25, 74.78, 128.37, 128.62, 133.58, 140.23, 217.28; FT-IR: (KBr)  $\nu_{\max}$ : 3447, 2927, 1696, 1489, 830  $\text{cm}^{-1}$ ; MS (EI),  $m/z$  (relative intensity): 275  $[\text{M}+\text{Na}]^+$ ; HRMS (ESI-TOF) calculated for  $\text{C}_{20}\text{H}_{29}\text{NO}_4$  ( $\text{M}+\text{Na}^+$ ): 275.0814, found 275.0803.

HPLC and NMR data start on the next page.

## HPLC and NMR data for Catalysts: PicAm-1-3

### HPLC of racemic PicAm-1

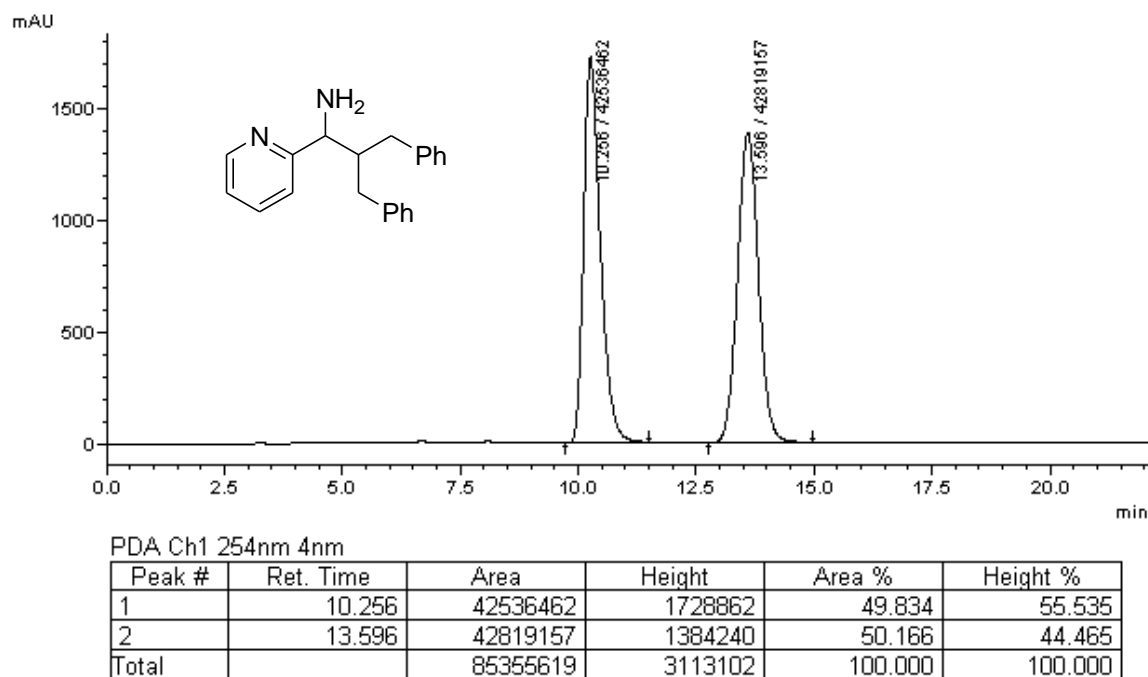

### HPLC of enantiopure PicAm-1

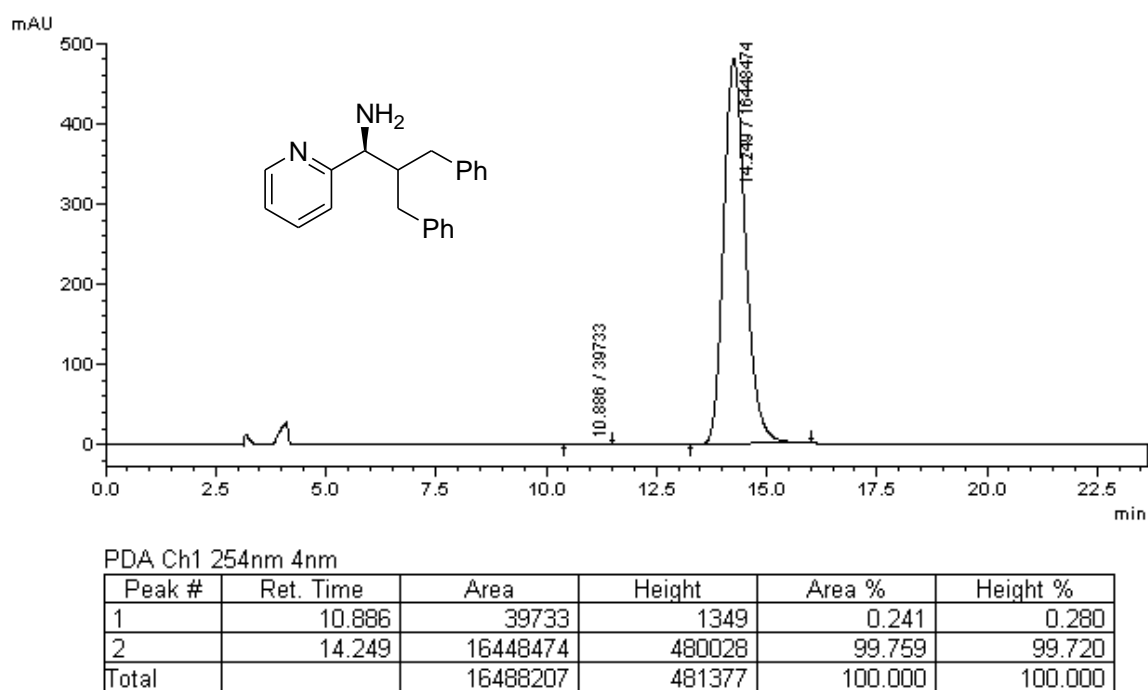

### HPLC of racemic PicAm-2 derivative

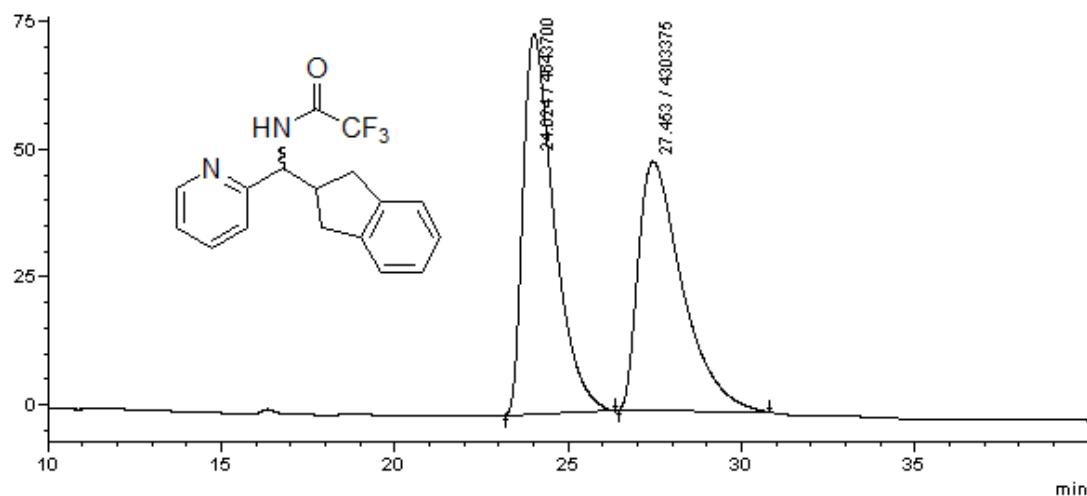

PDA Ch1 254nm 4nm

| Peak # | Ret. Time | Area    | Height | Area %  | Height % | Width at 10% Height | Mark |
|--------|-----------|---------|--------|---------|----------|---------------------|------|
| 1      | 24.024    | 4643700 | 74519  | 51.902  | 60.481   | 1.870               |      |
| 2      | 27.463    | 4303375 | 48692  | 48.098  | 39.519   | 2.664               |      |
| Total  |           | 8947075 | 123211 | 100.000 | 100.000  |                     |      |

### HPLC of enantiopure PicAm-2 derivative

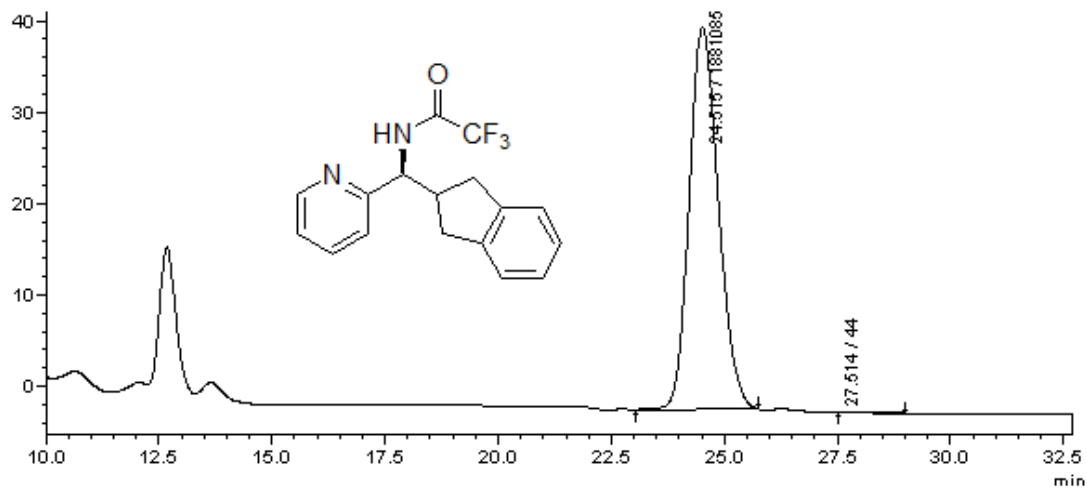

PDA Ch1 254nm 4nm

| Peak # | Ret. Time | Area    | Height | Area %  | Height % | Width at 10% Height | Mark |
|--------|-----------|---------|--------|---------|----------|---------------------|------|
| 1      | 24.515    | 1881085 | 41829  | 99.998  | 99.986   | 1.301               |      |
| 2      | 27.514    | 44      | 6      | 0.002   | 0.014    | 0.004               |      |
| Total  |           | 1881129 | 41835  | 100.000 | 100.000  |                     |      |

### HPLC of racemic phenyl(pyridin-2-yl)methanamine (PicAm-3)

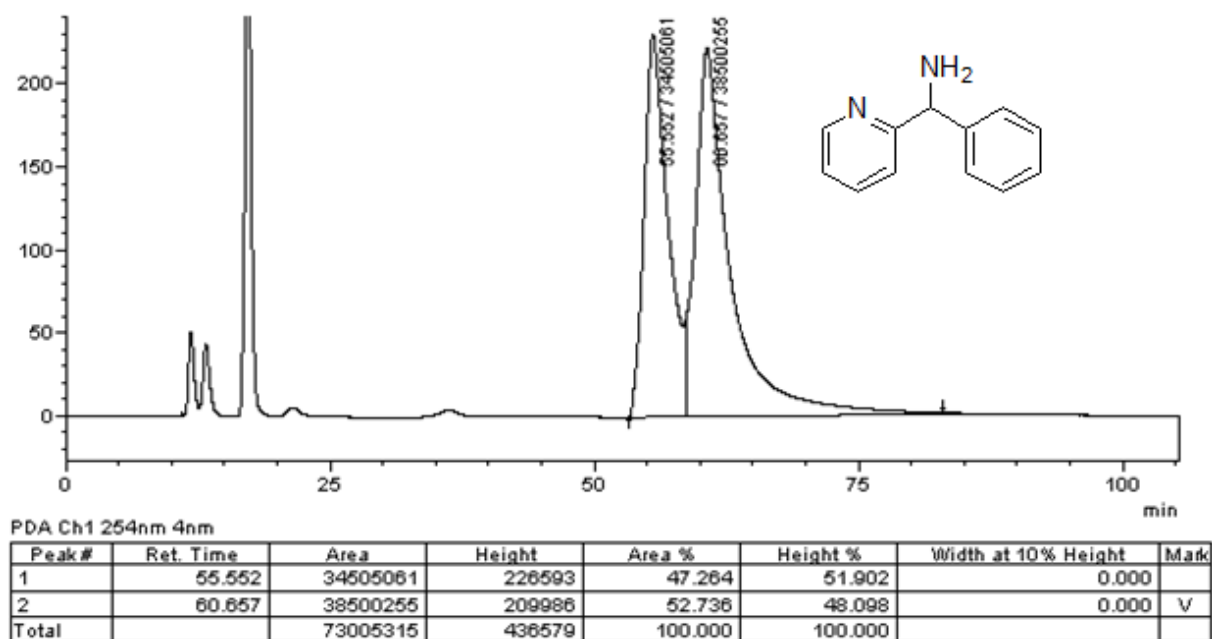

### HPLC of (*S*)-phenyl(pyridin-2-yl)methanamine (PicAm-3)

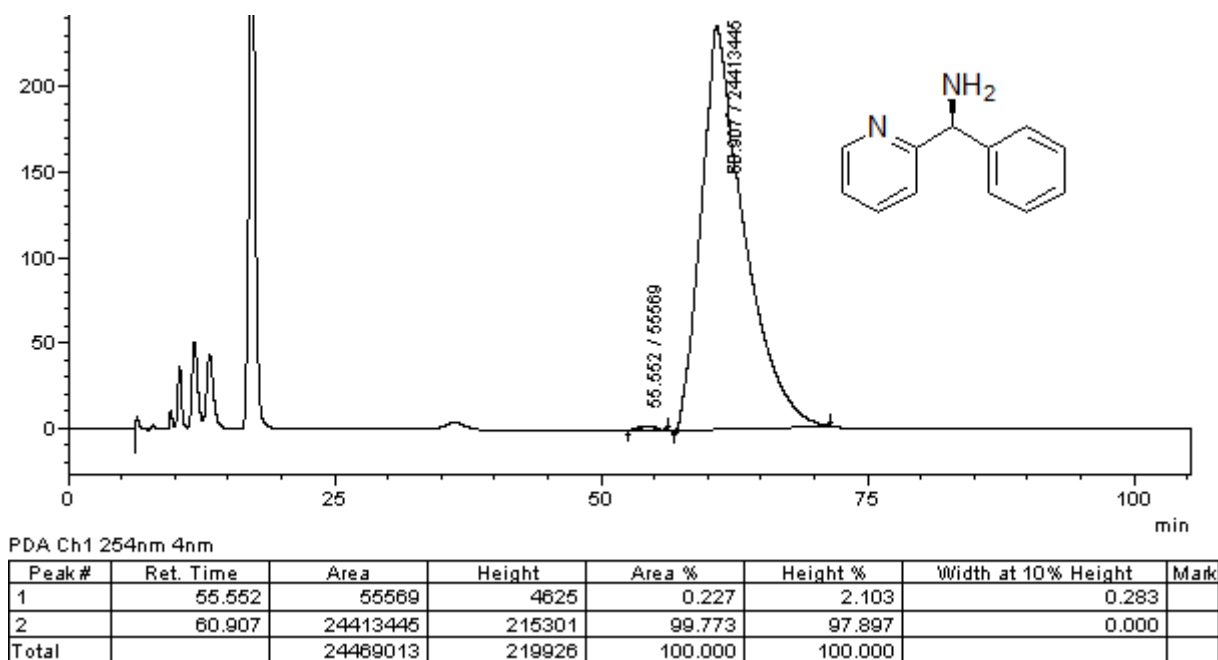

<sup>13</sup>C NMR of ketone

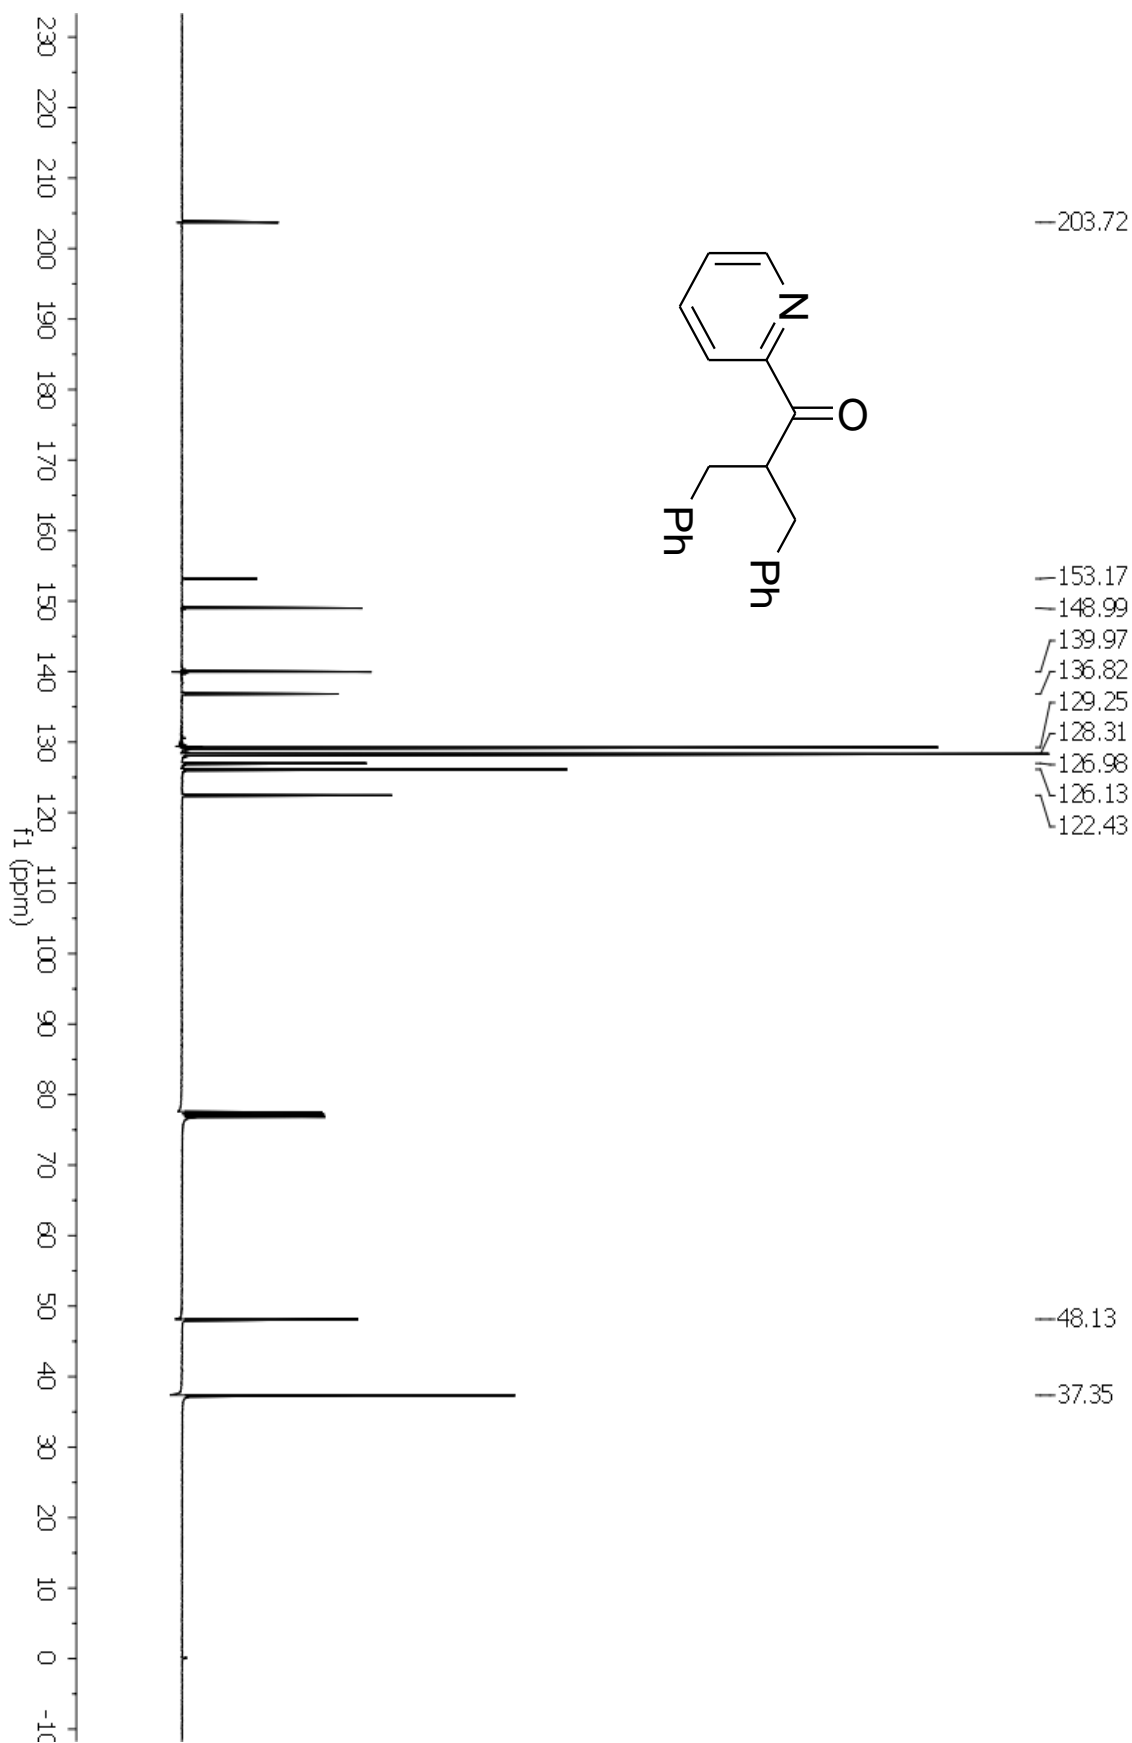



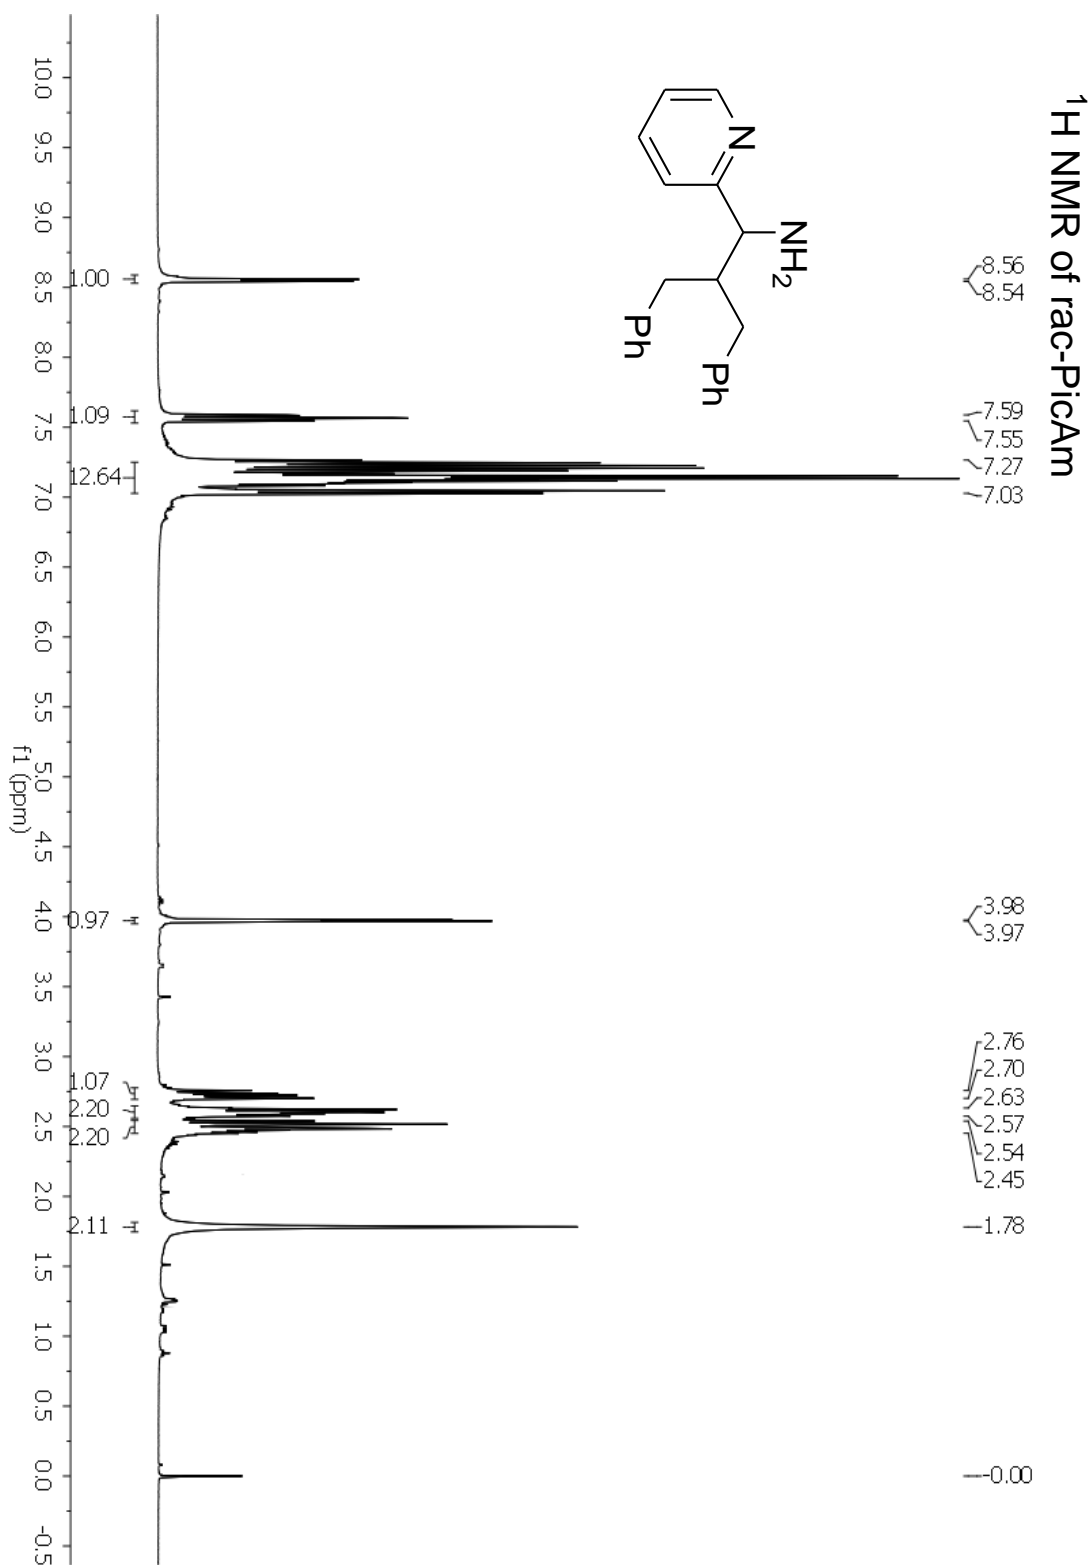

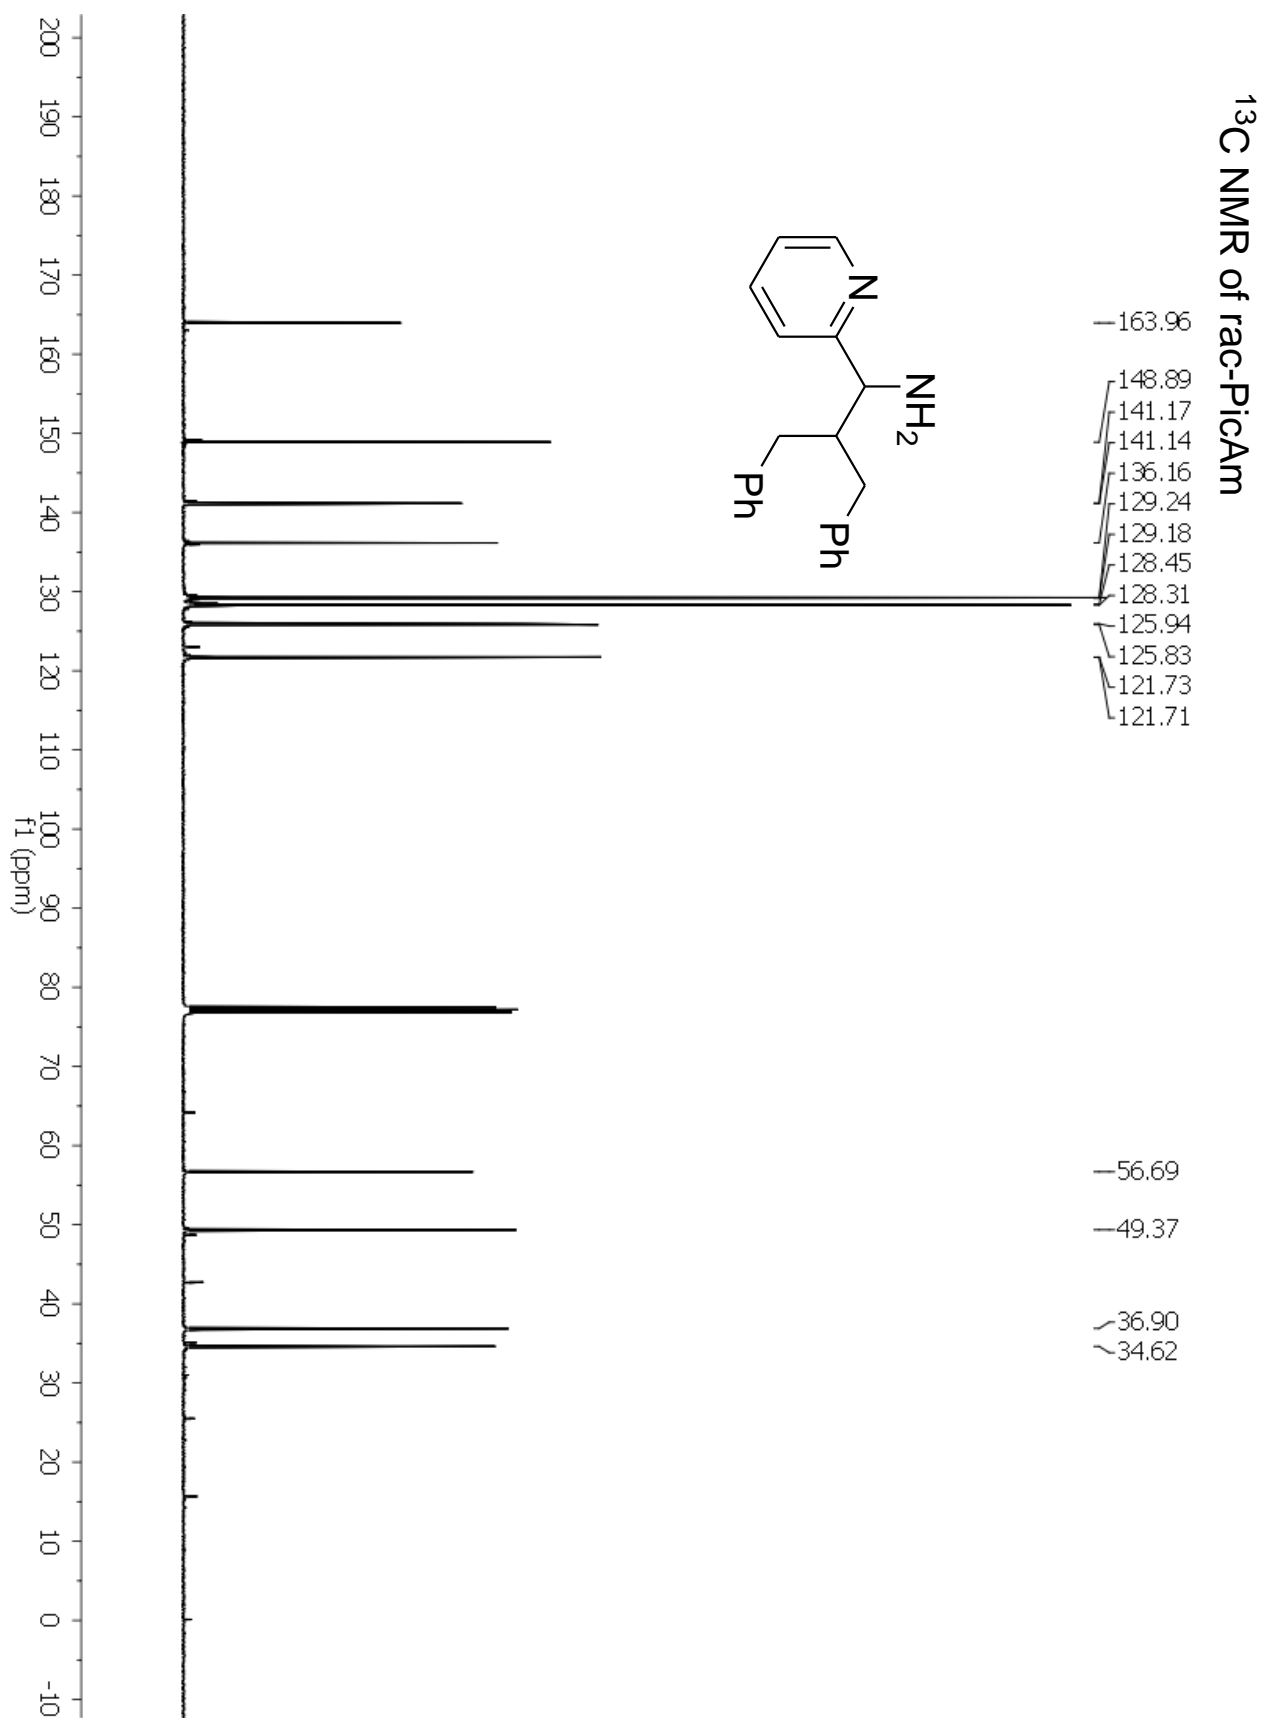

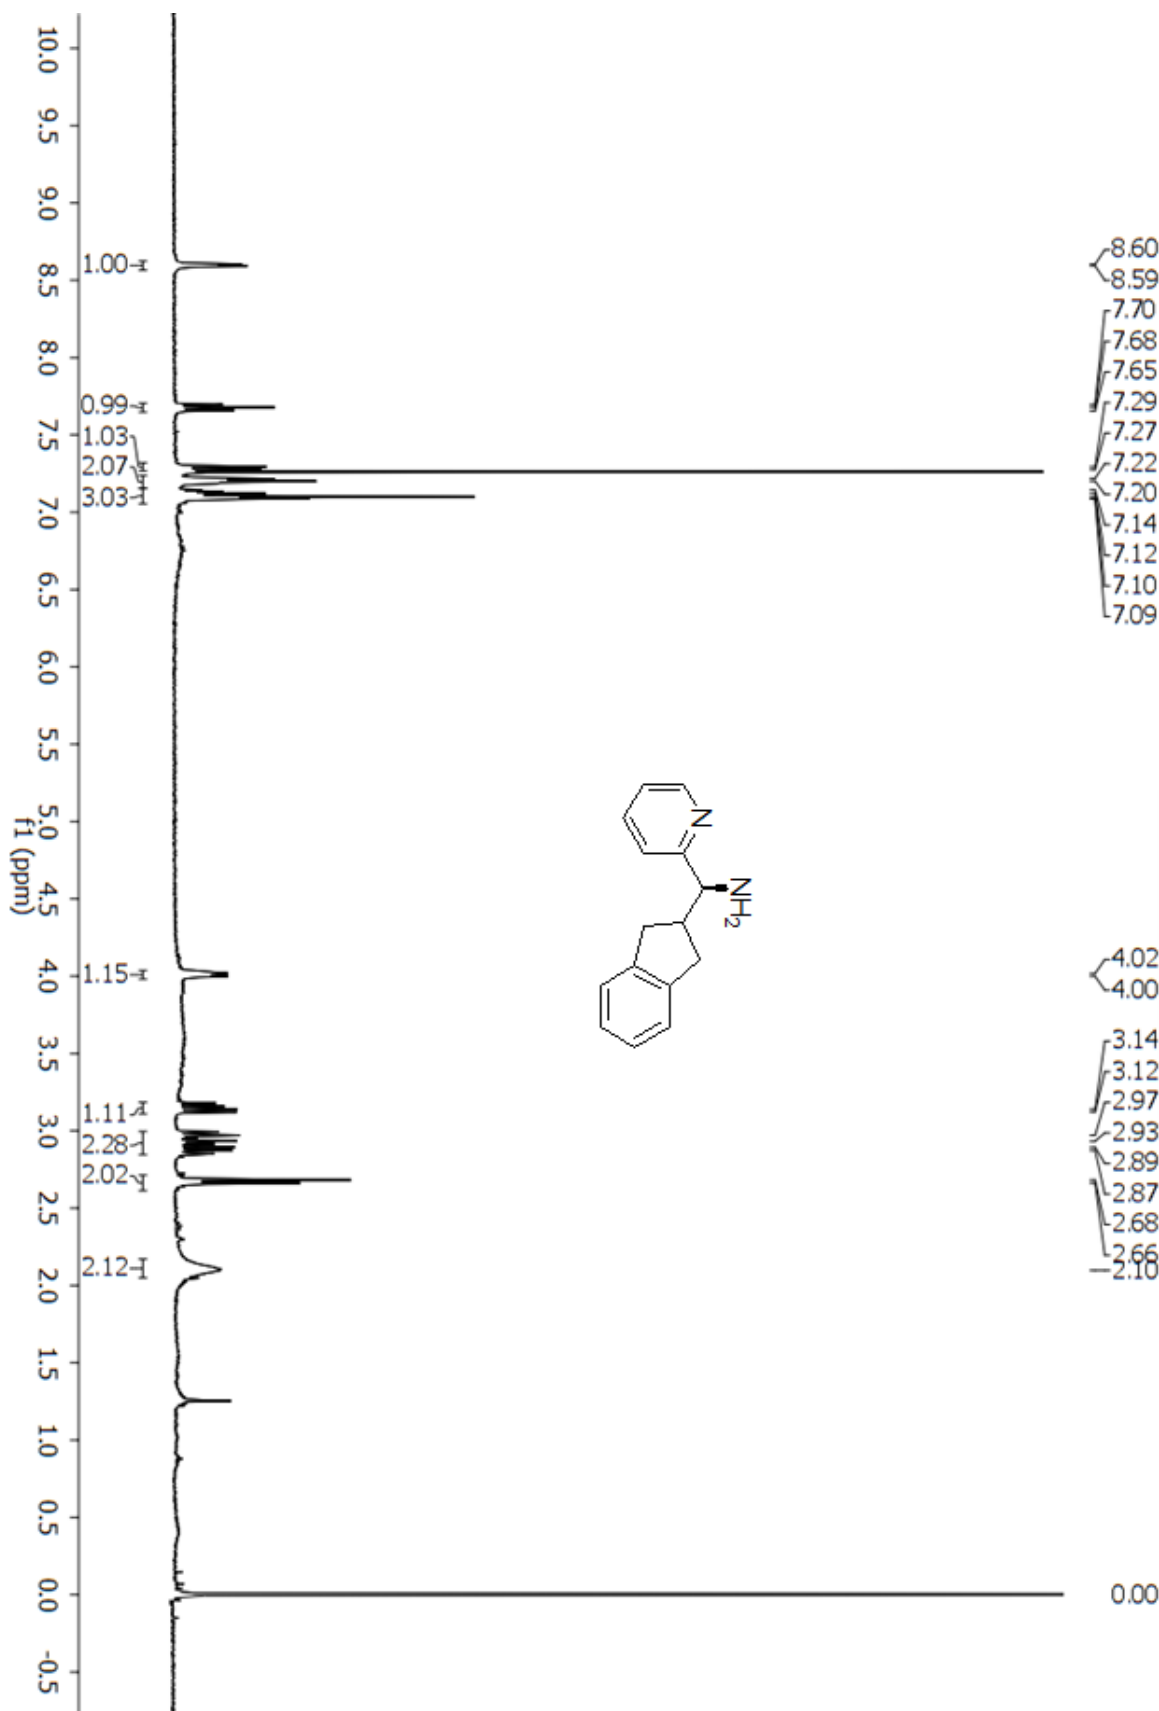

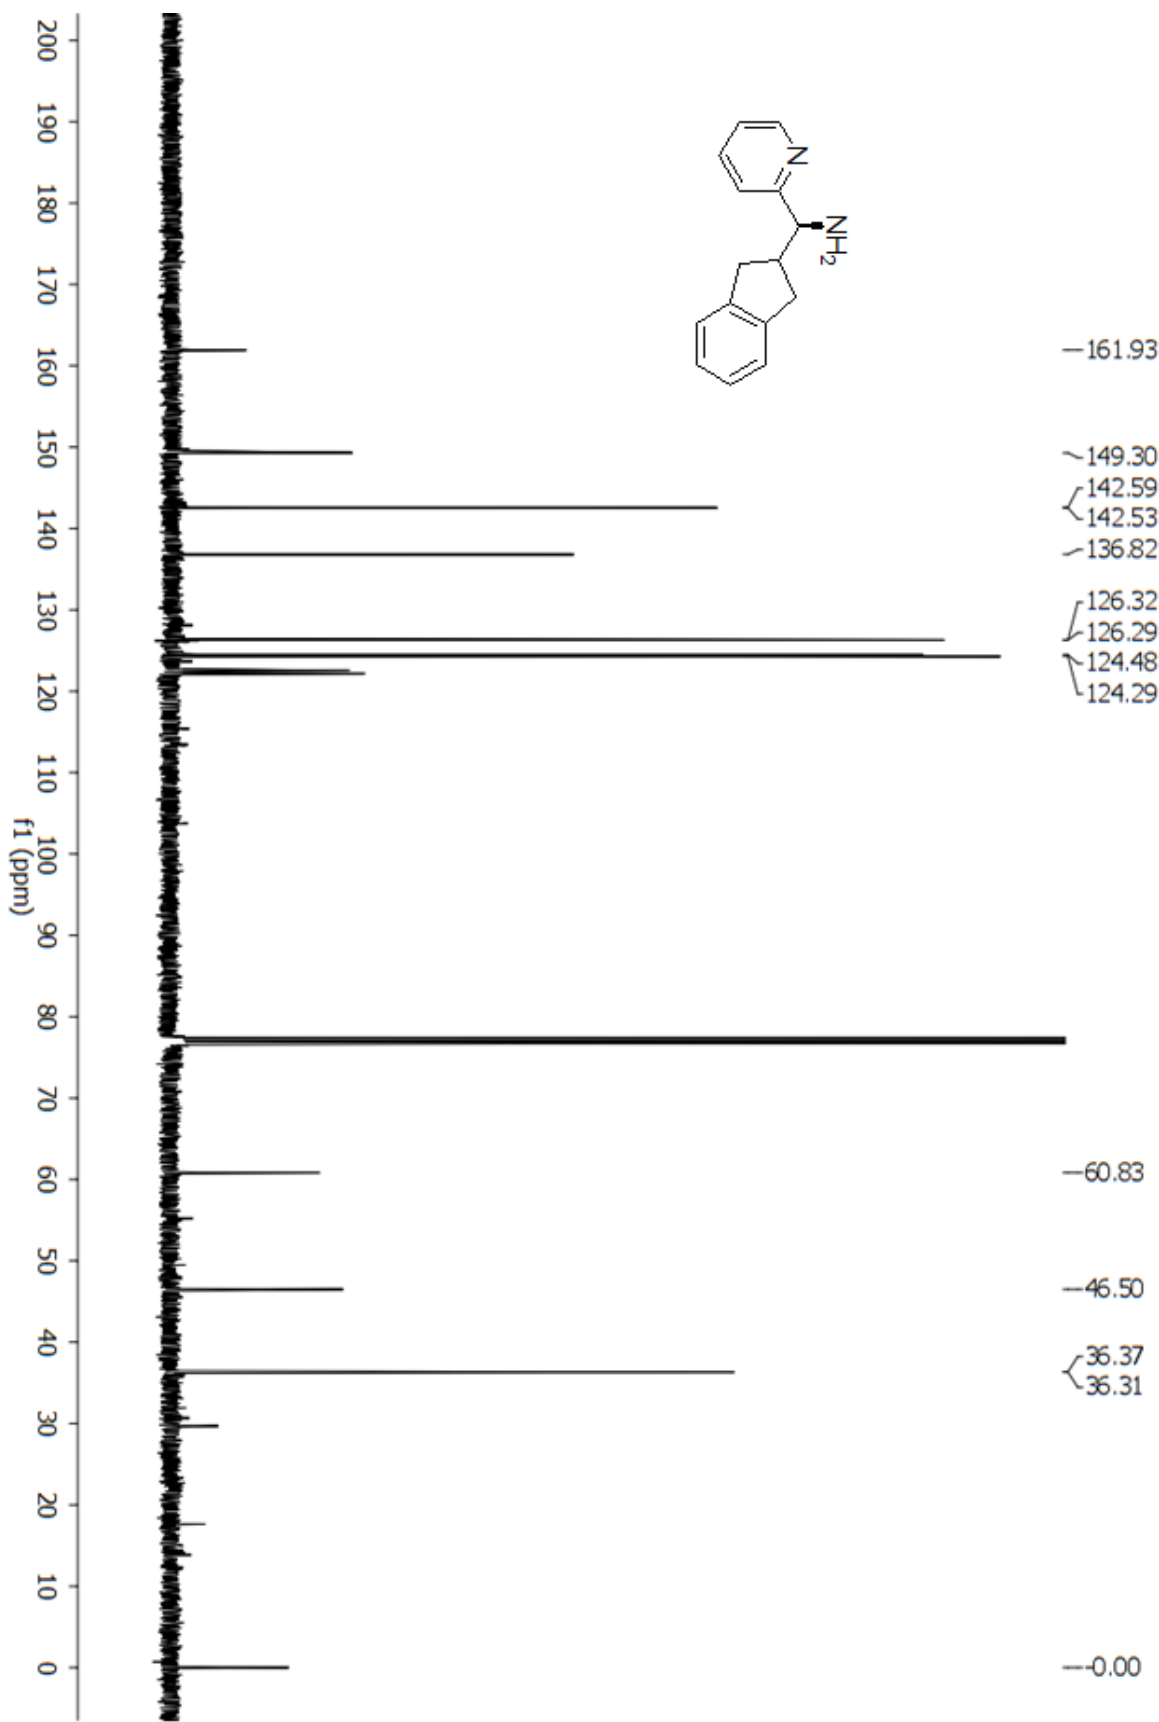

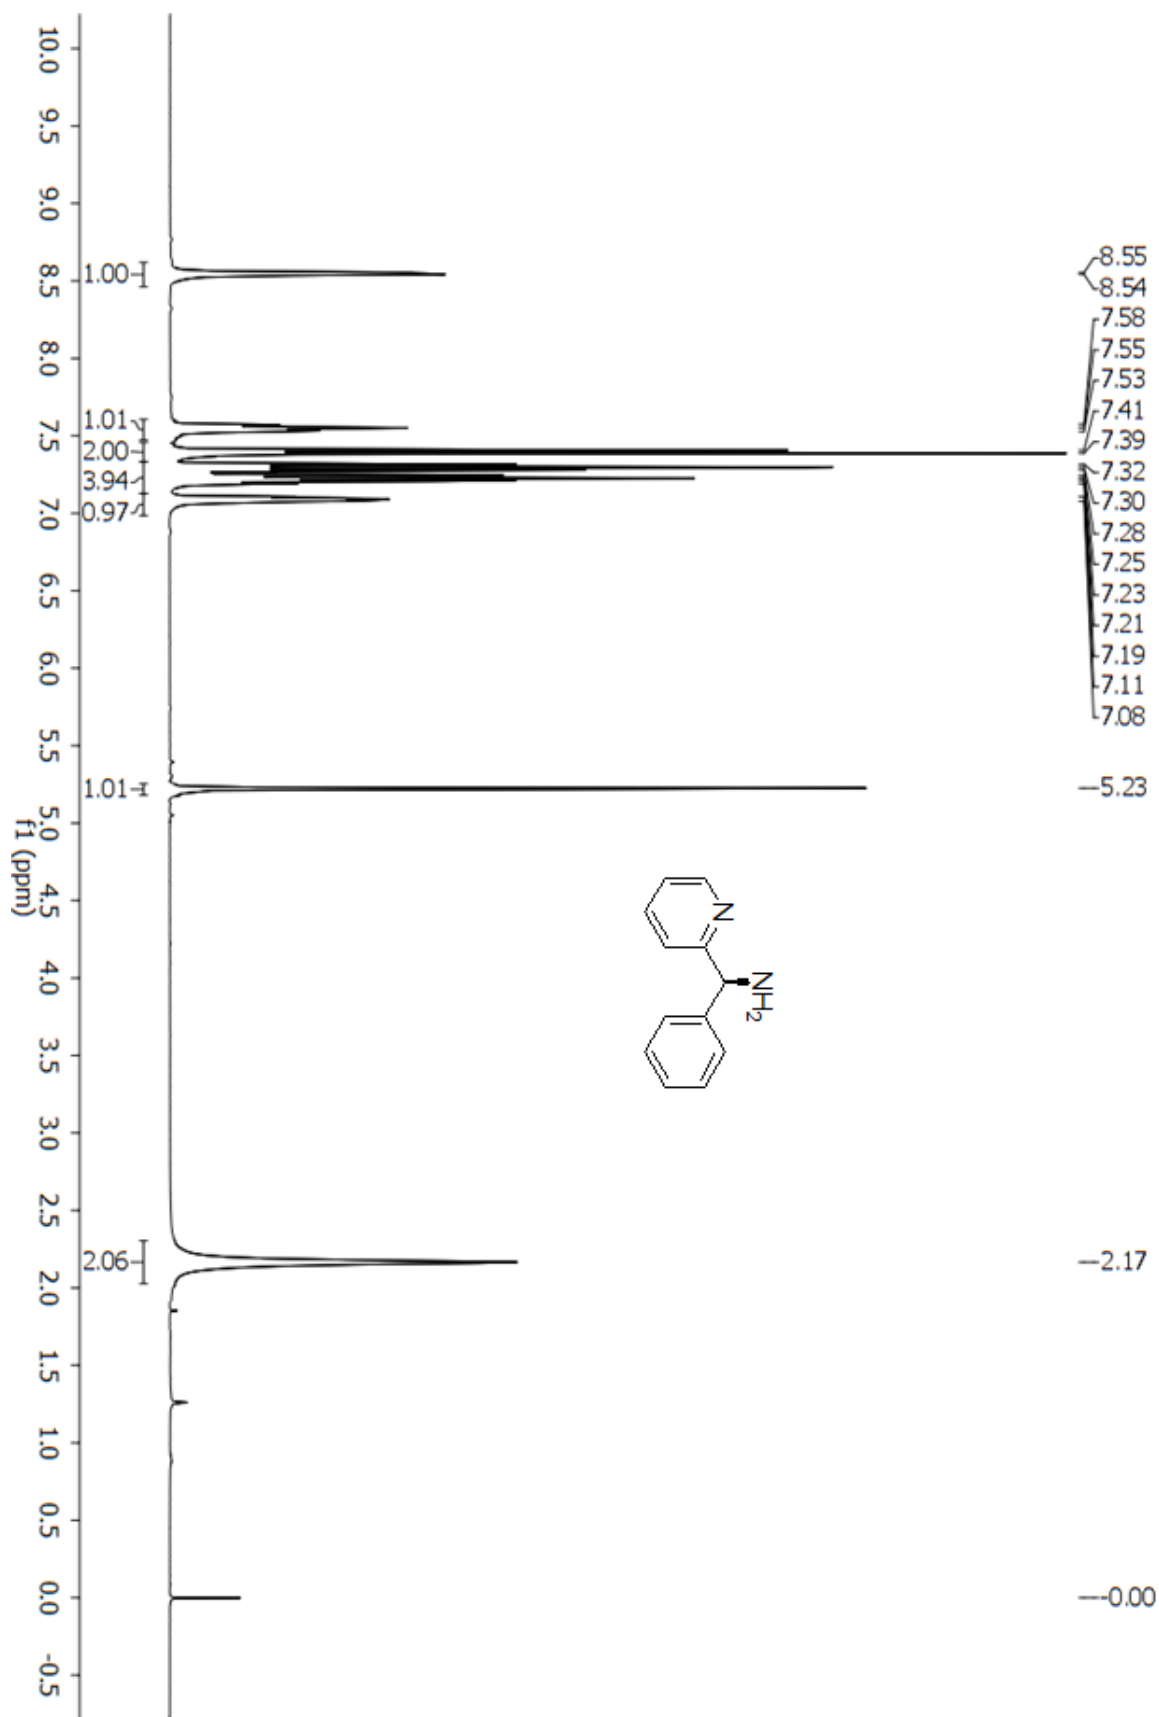

## HPLC and NMR data for Michael products

### HPLC of racemic 2-(2-nitro-1-phenylethyl)cyclopentanone (**4a**), Chiral AS-H

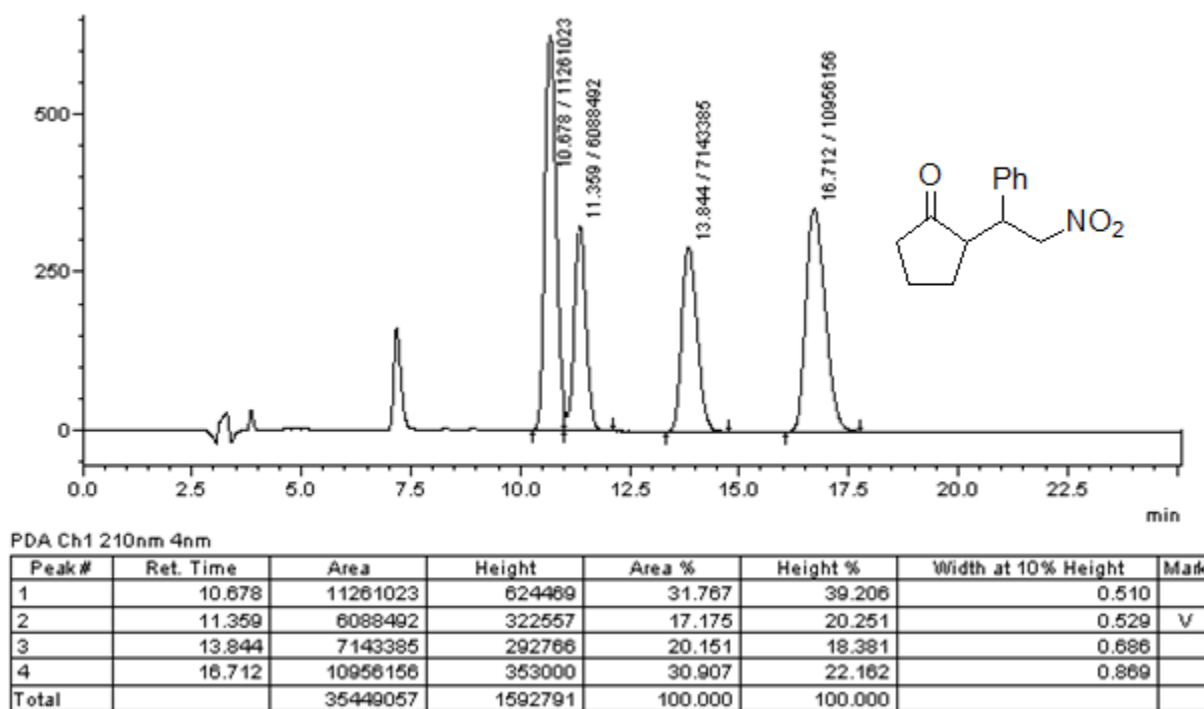

### HPLC of (*S*)-2-((*R*)-2-nitro-1-phenylethyl)cyclopentanone (**4a**), Chiral AS-H

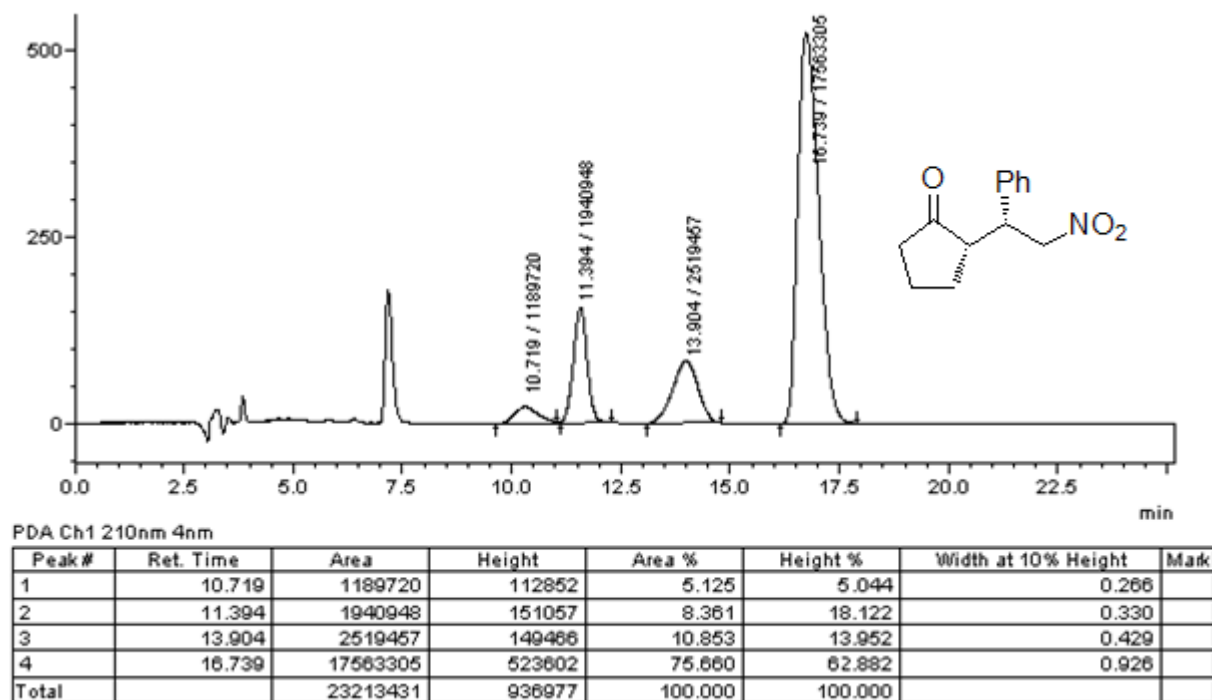



### HPLC of racemic 2-(2-nitro-1-phenylethyl)cyclopentanone (**4a**), Chiral OD-H

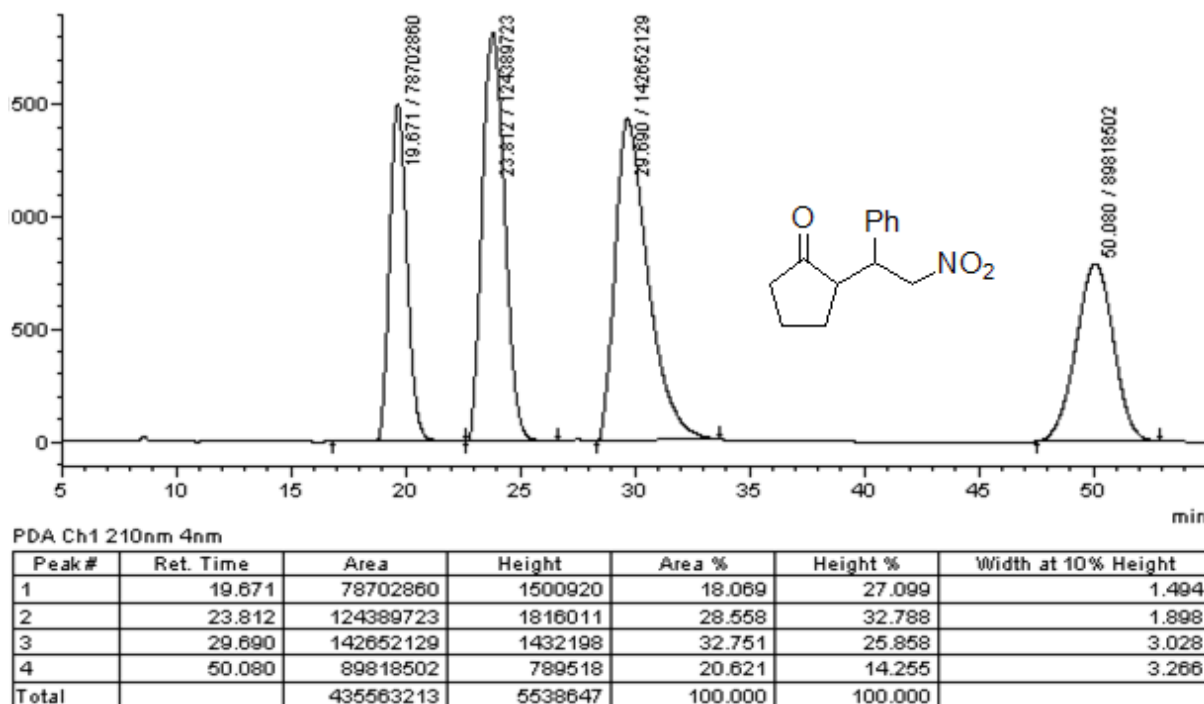

### HPLC of (*S*)-2-((*R*)-2-nitro-1-phenylethyl)cyclopentanone (**4a**), Chiral OD-H

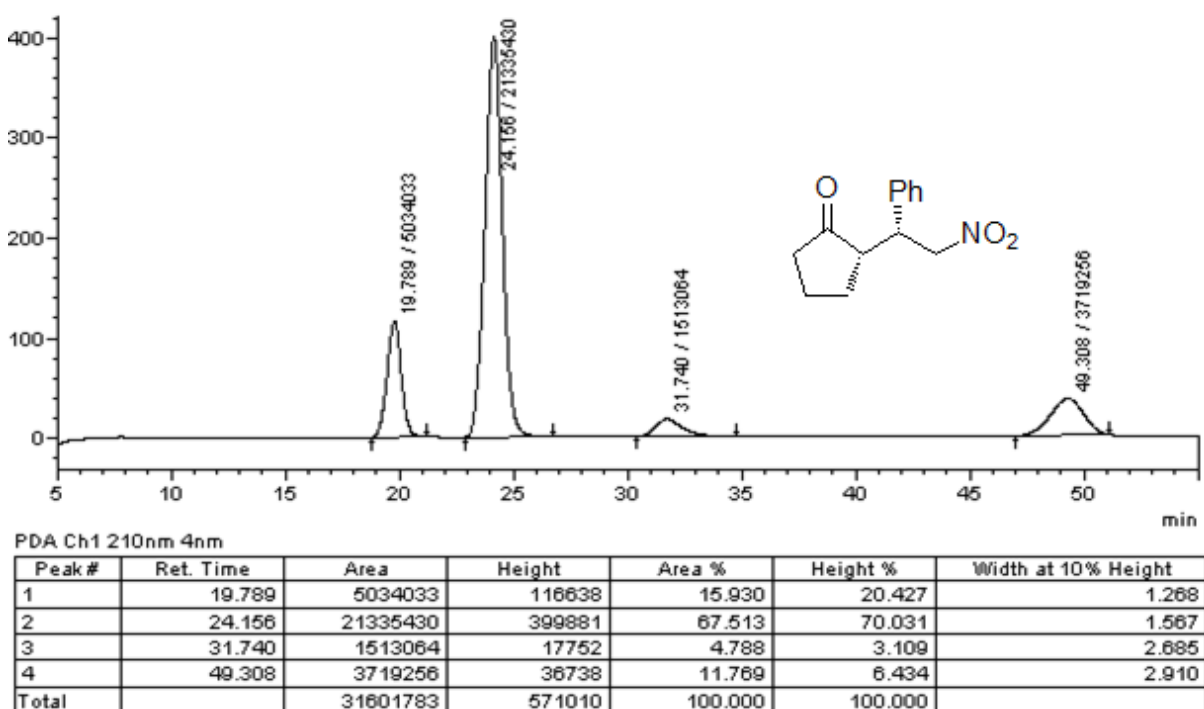

### HPLC of racemic 2-(2-nitro-1-p-tolyethyl)cyclopentanone (**4b**)

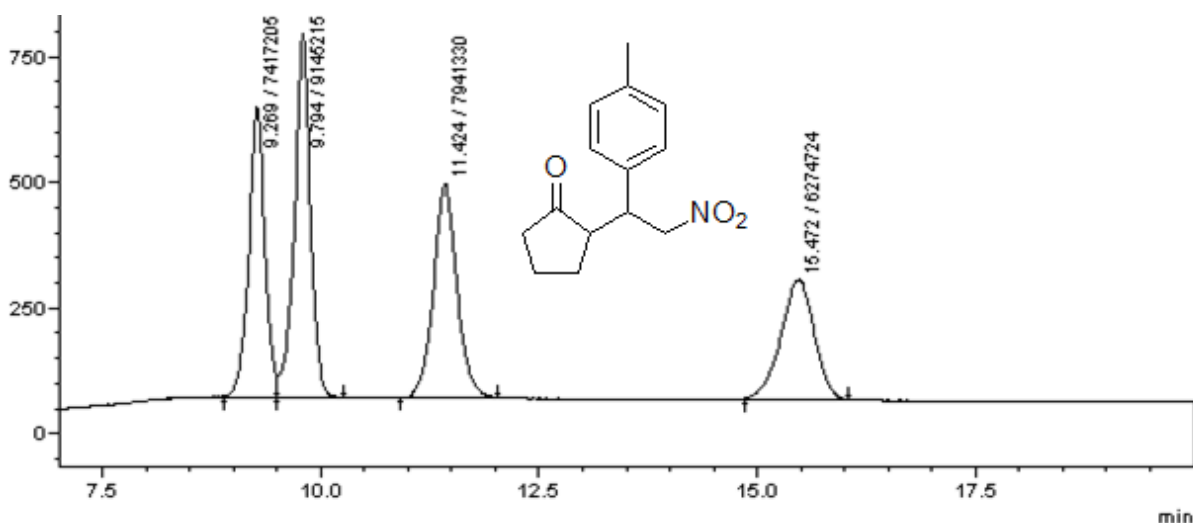

PDA Ch1 190nm 4nm

| Peak # | Ret. Time | Area     | Height  | Area %  | Height % | Width at 10% Height |
|--------|-----------|----------|---------|---------|----------|---------------------|
| 1      | 9.269     | 7417205  | 576852  | 24.099  | 29.398   | 0.407               |
| 2      | 9.794     | 9146215  | 723959  | 29.713  | 36.895   | 0.410               |
| 3      | 11.424    | 7941330  | 424339  | 25.802  | 21.626   | 0.577               |
| 4      | 15.472    | 6274724  | 237058  | 20.387  | 12.081   | 0.783               |
| Total  |           | 30778475 | 1962209 | 100.000 | 100.000  |                     |

### HPLC of (*S*)-2-((*R*)-2-nitro-1-p-tolyethyl)cyclopentanone (**4b**)

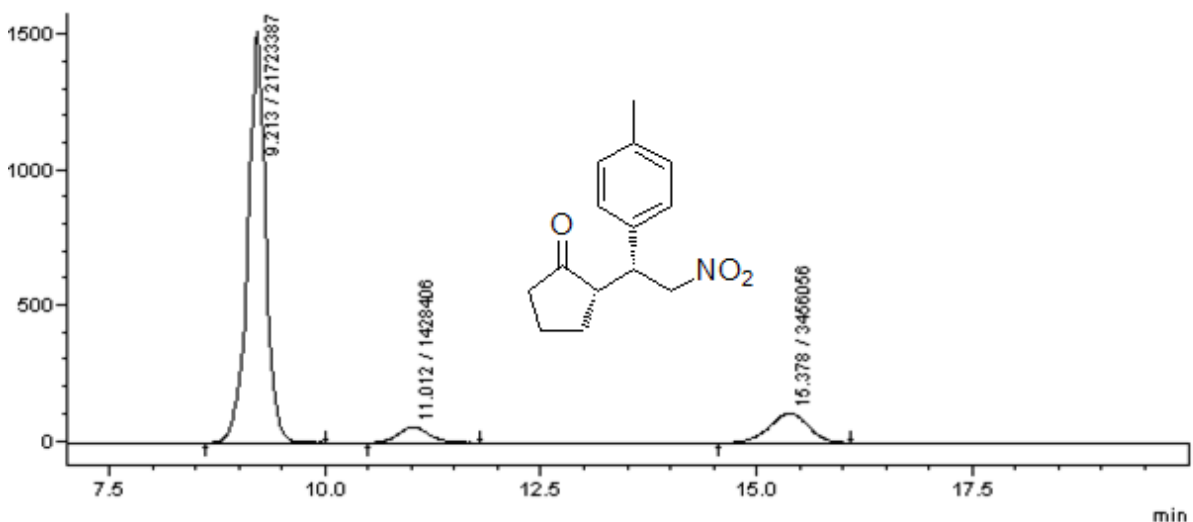

PDA Ch1 190nm 4nm

| Peak # | Ret. Time | Area     | Height  | Area %  | Height % | Width at 10% Height |
|--------|-----------|----------|---------|---------|----------|---------------------|
| 1      | 9.213     | 21723387 | 1516914 | 81.643  | 90.054   | 0.457               |
| 2      | 11.012    | 1428406  | 57886   | 5.368   | 3.437    | 0.732               |
| 3      | 15.378    | 3466056  | 109642  | 12.989  | 6.509    | 0.918               |
| Total  |           | 26607849 | 1684443 | 100.000 | 100.000  |                     |

### HPLC of racemic 2-(1-(4-methoxyphenyl)-2-nitroethyl)cyclopentanone (**4c**)

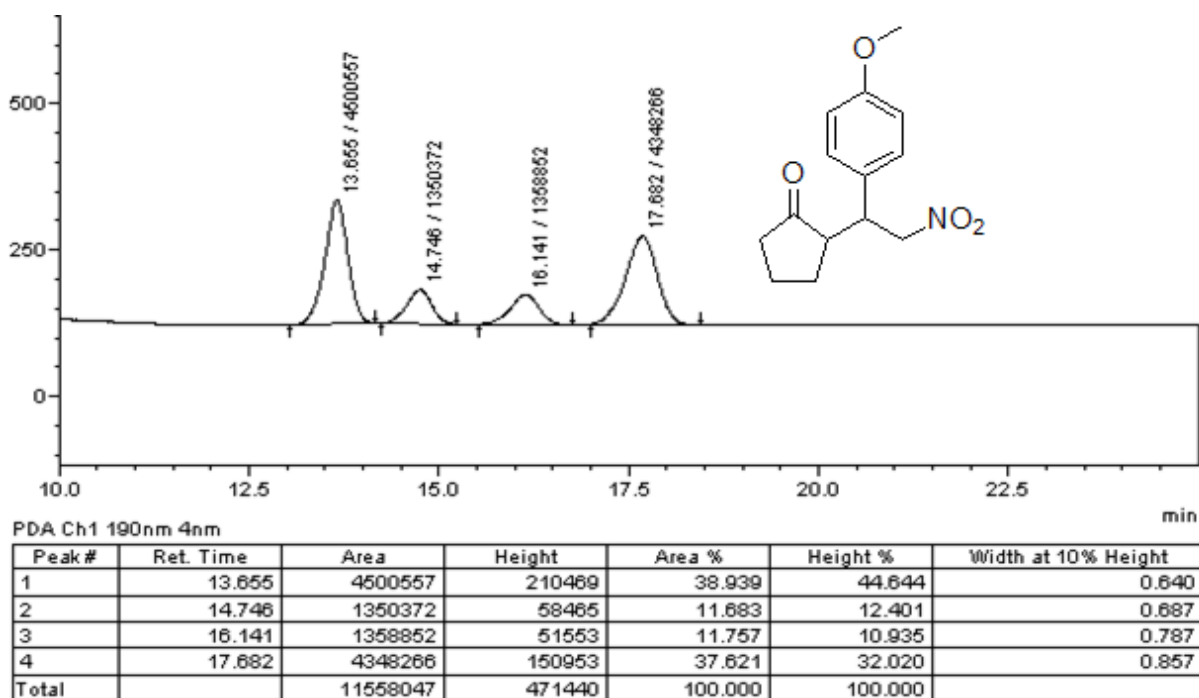

### HPLC of (*S*)-2-((*R*)-1-(4-methoxyphenyl)-2-nitroethyl)cyclopentanone (**4c**)

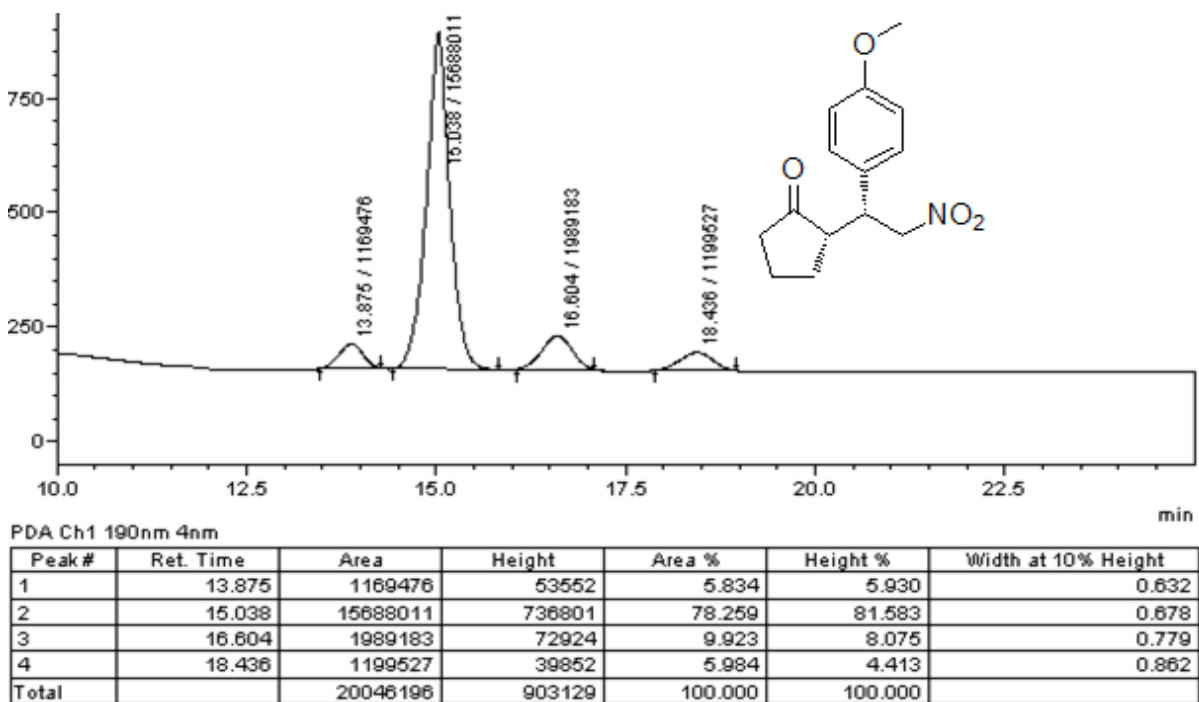

# HPLC of racemic 2-(1-(furan-2-yl)-2-nitroethyl)cyclopentanone (**4d**)

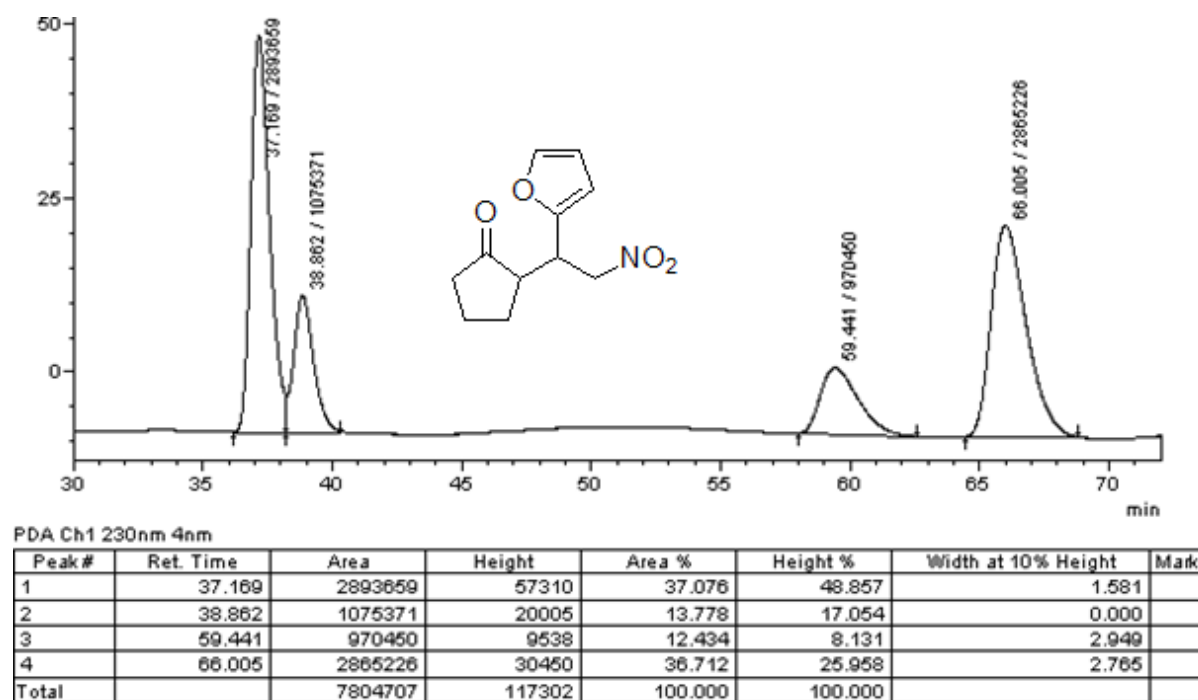

# HPLC of (*S*)-2-((*S*)-1-(furan-2-yl)-2-nitroethyl)cyclopentanone (**4d**)

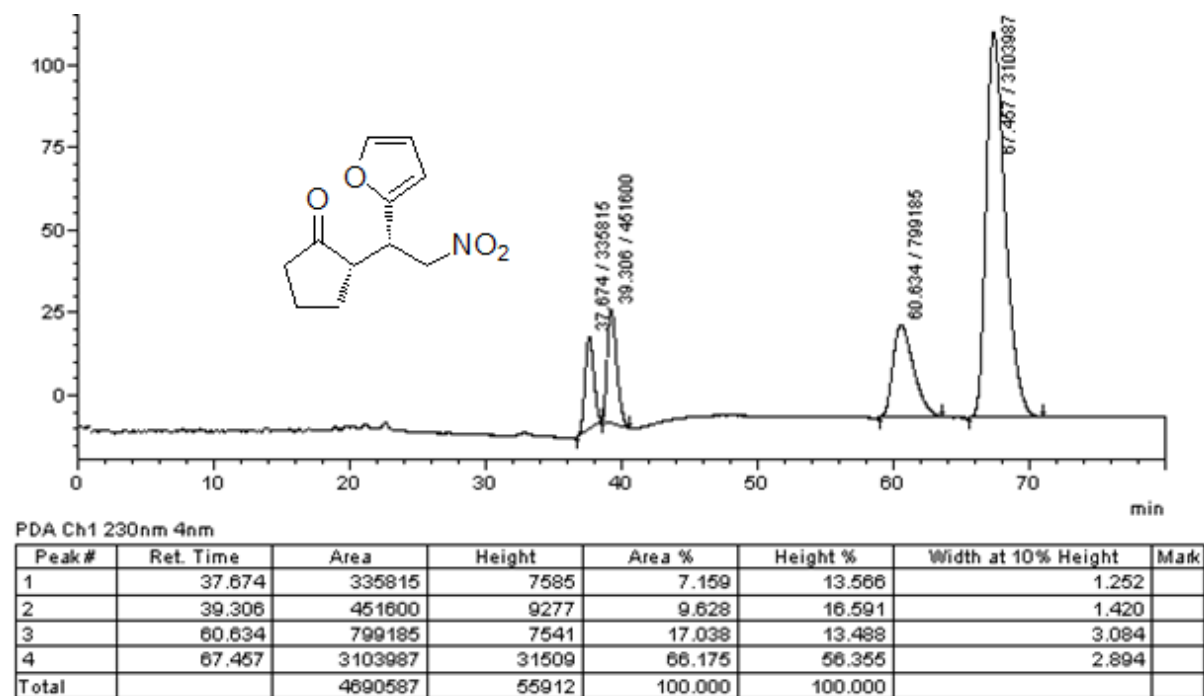

### HPLC of racemic 2,2-dimethyl-4-nitro-3-phenylbutanal (**5a**)

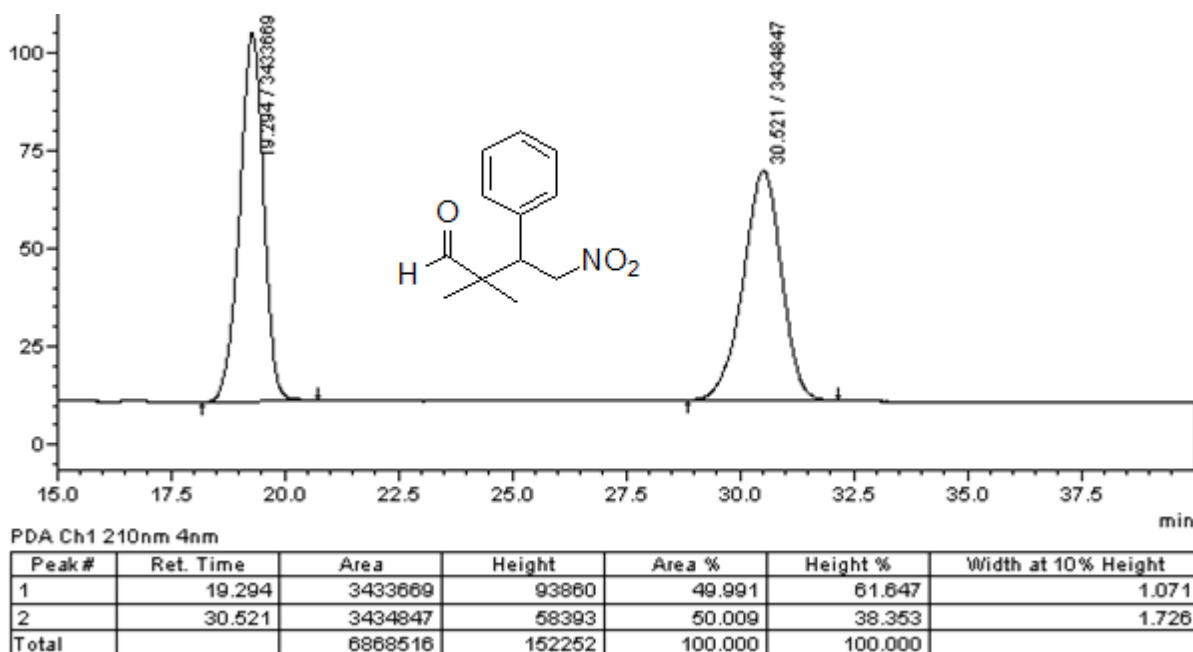

### HPLC of (*S*)-2,2-dimethyl-4-nitro-3-phenylbutanal (**5a**)

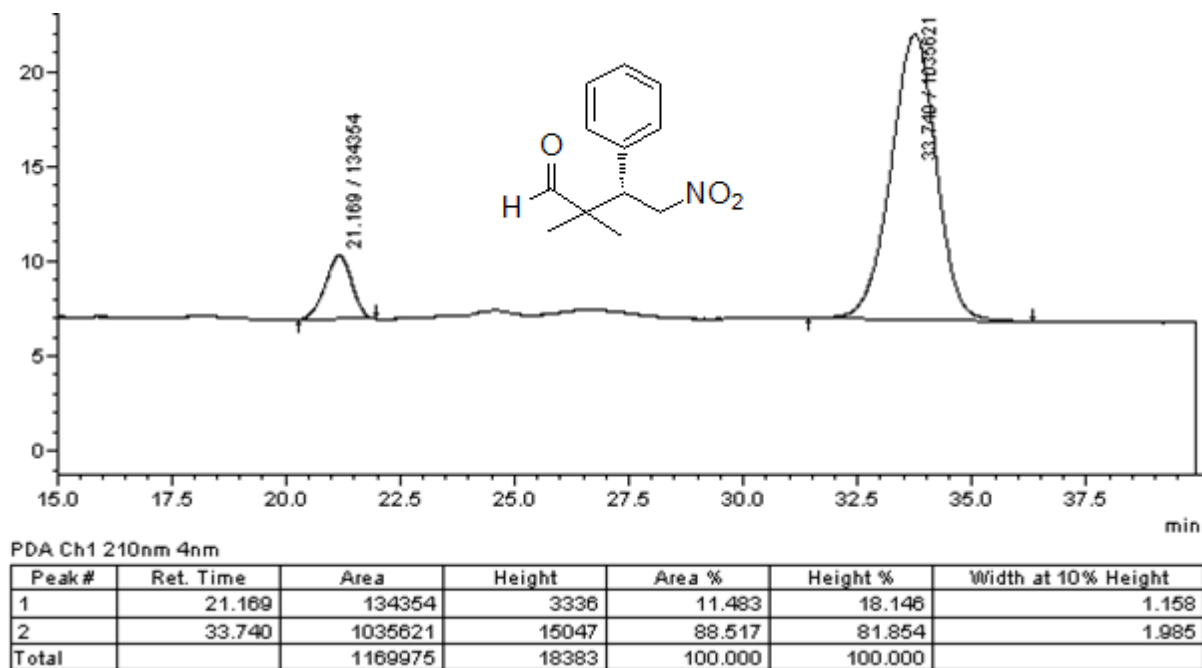

### HPLC of racemic 2,2-dimethyl-4-nitro-3-p-tolylbutanal (**5b**)

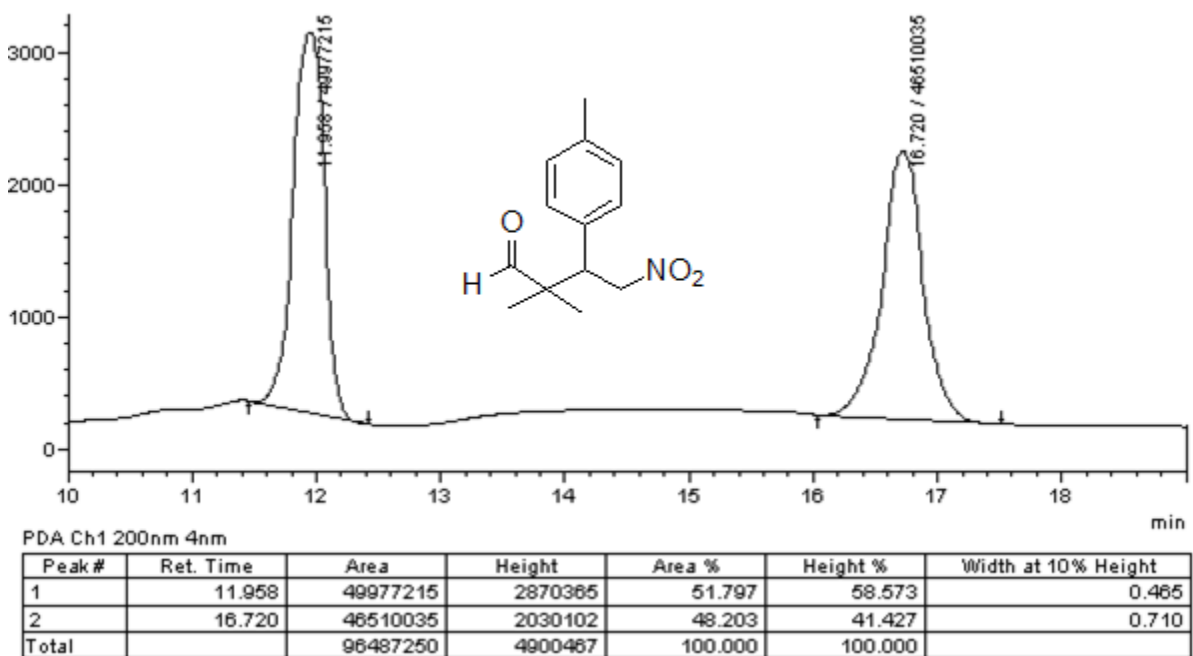

### HPLC of (*S*)-2,2-dimethyl-4-nitro-3-p-tolylbutanal (**5b**)

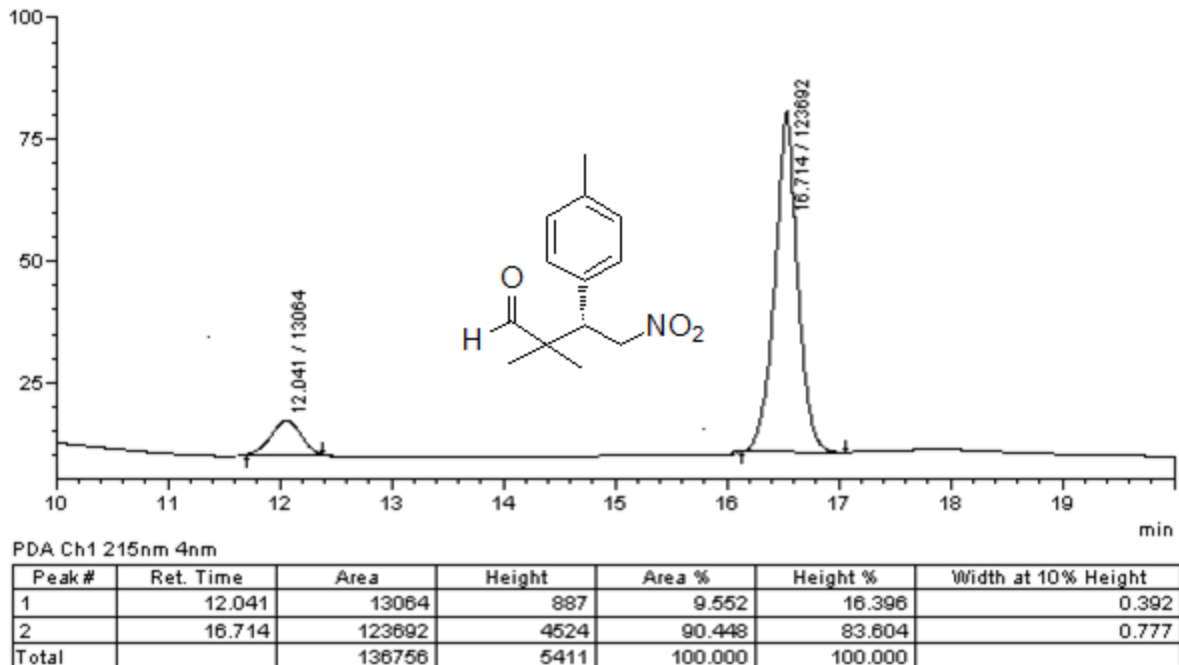



### HPLC of racemic 3-(4-methoxyphenyl)-2,2-dimethyl-4-nitrobutanal (**5c**)

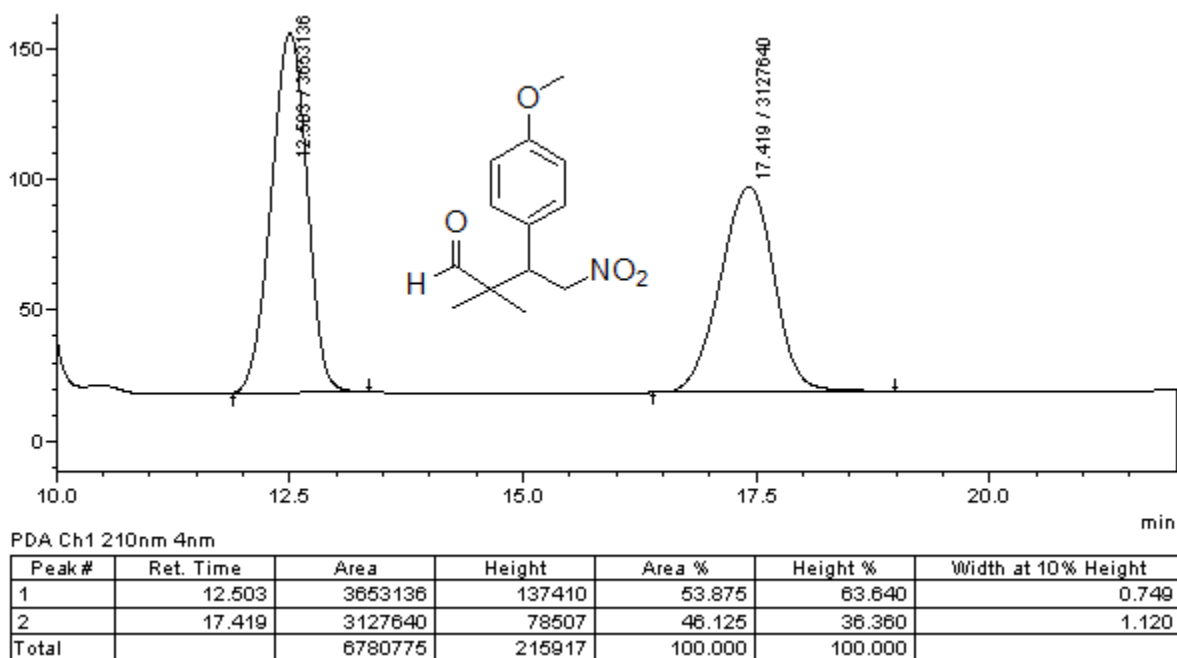

### HPLC of (*S*)-3-(4-methoxyphenyl)-2,2-dimethyl-4-nitrobutanal (**5c**)

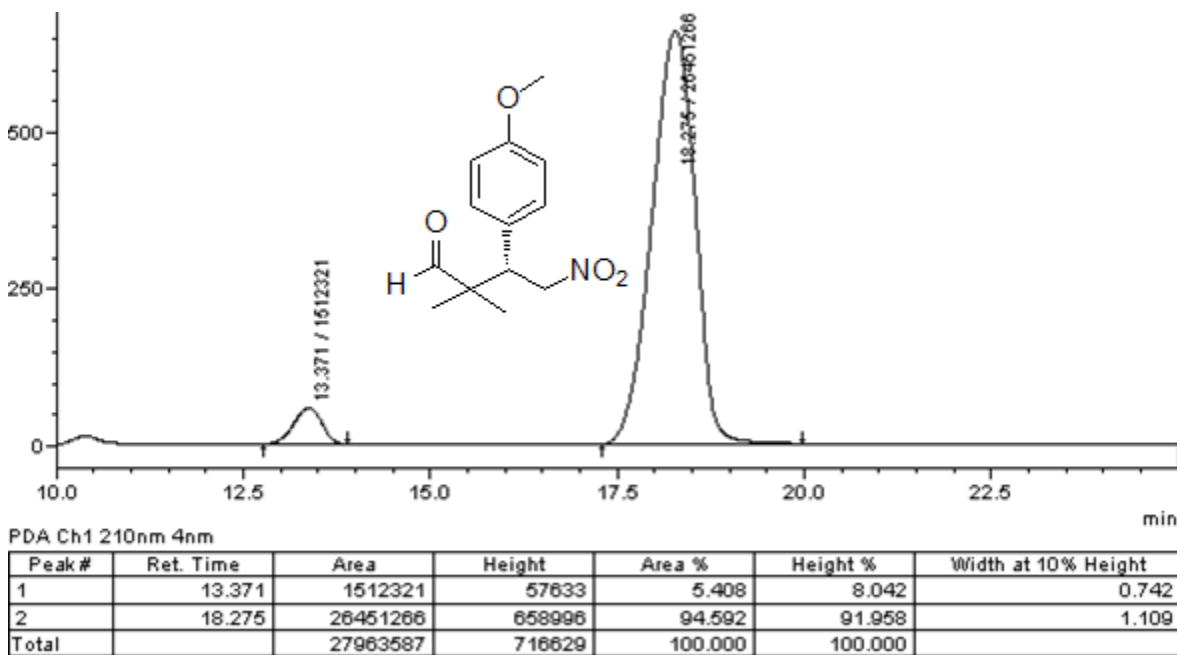

### HPLC of racemic 3-(furan-2-yl)-2,2-dimethyl-4-nitrobutanal (**5d**)

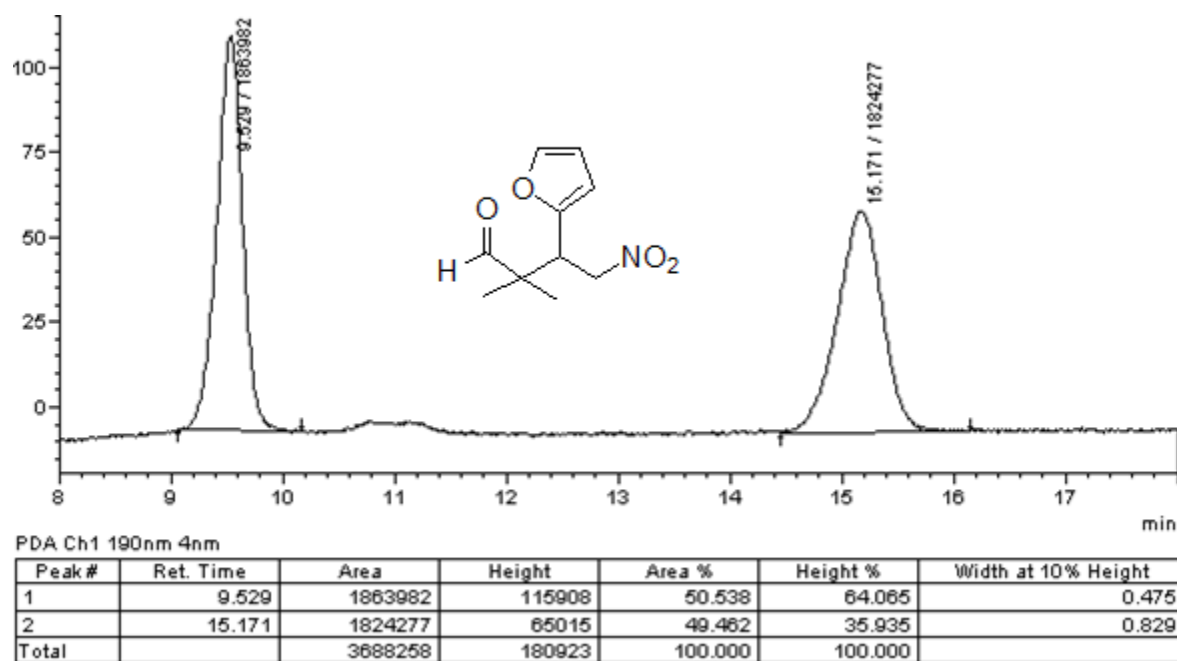

### HPLC of (*S*)-3-(furan-2-yl)-2,2-dimethyl-4-nitrobutanal (**5d**)

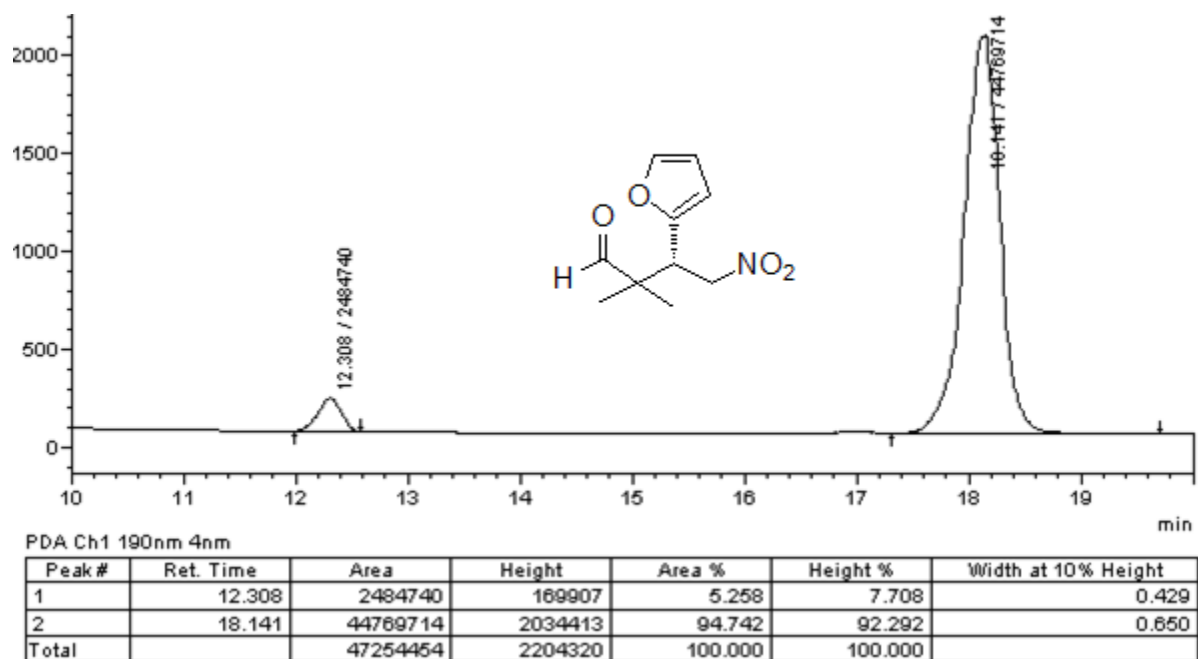

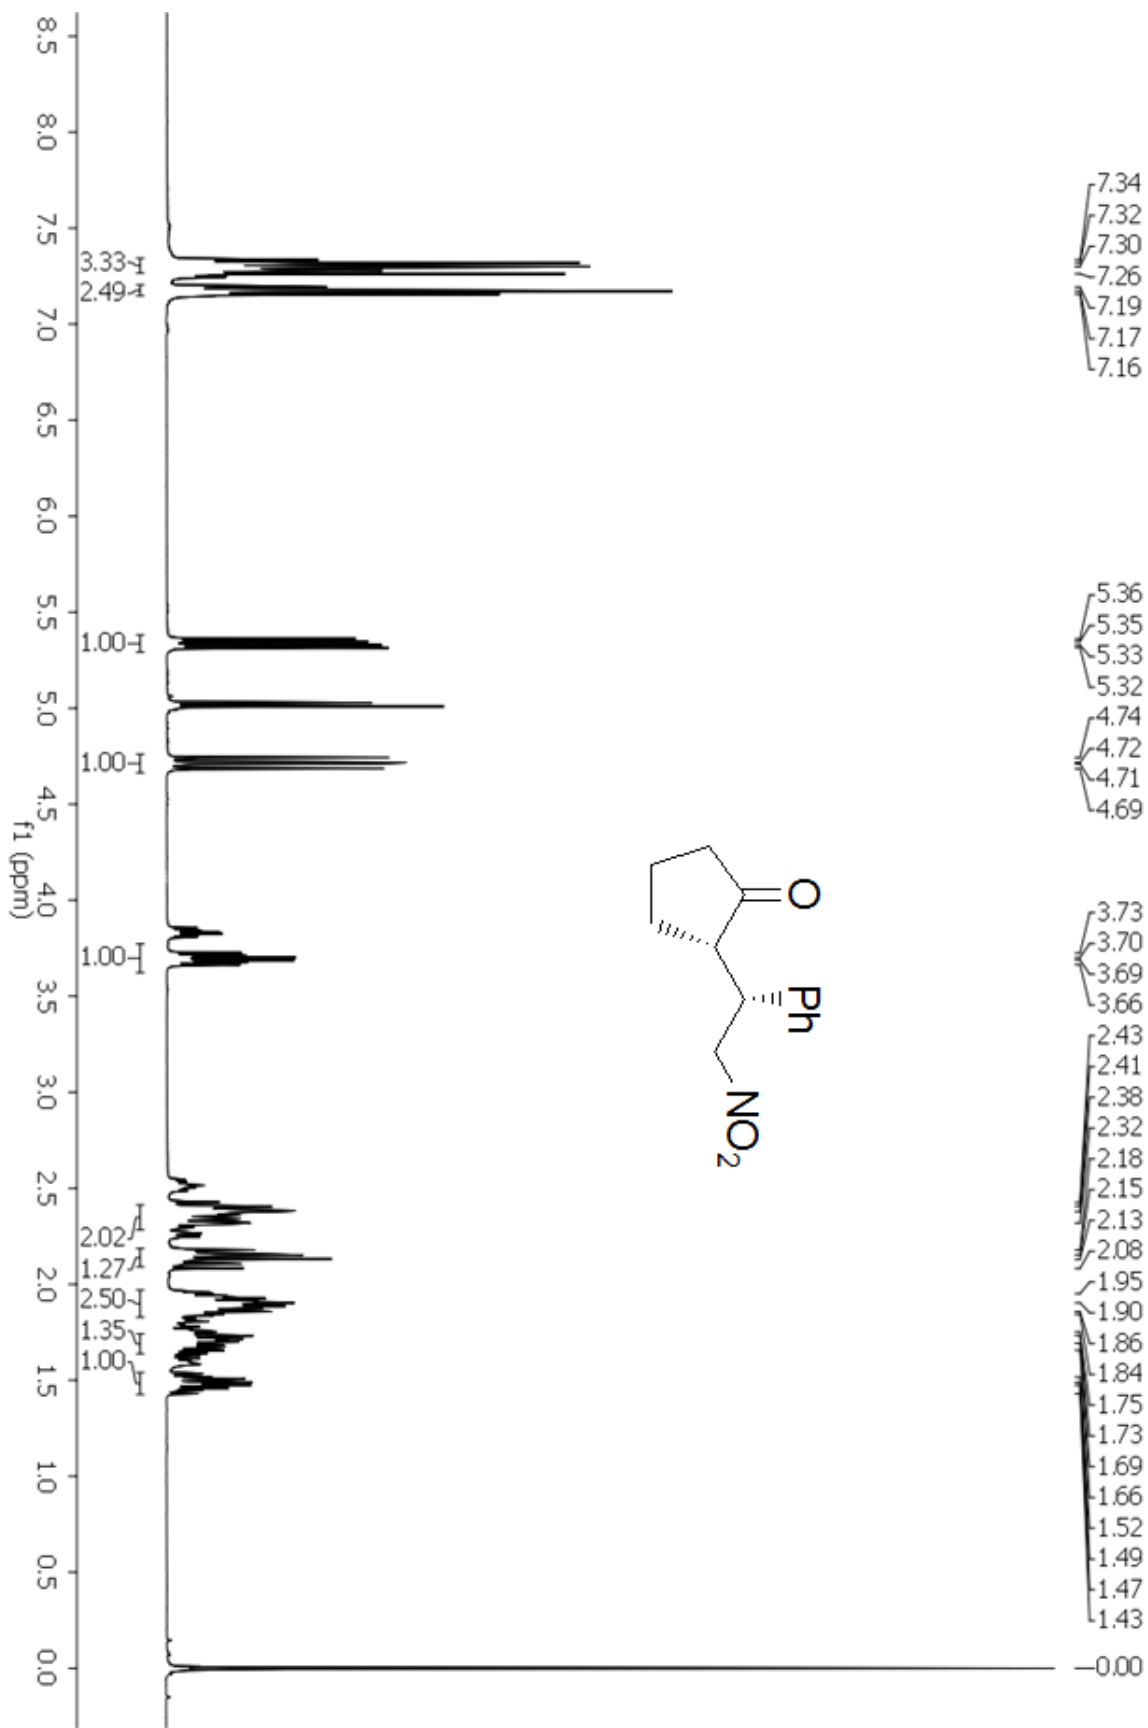

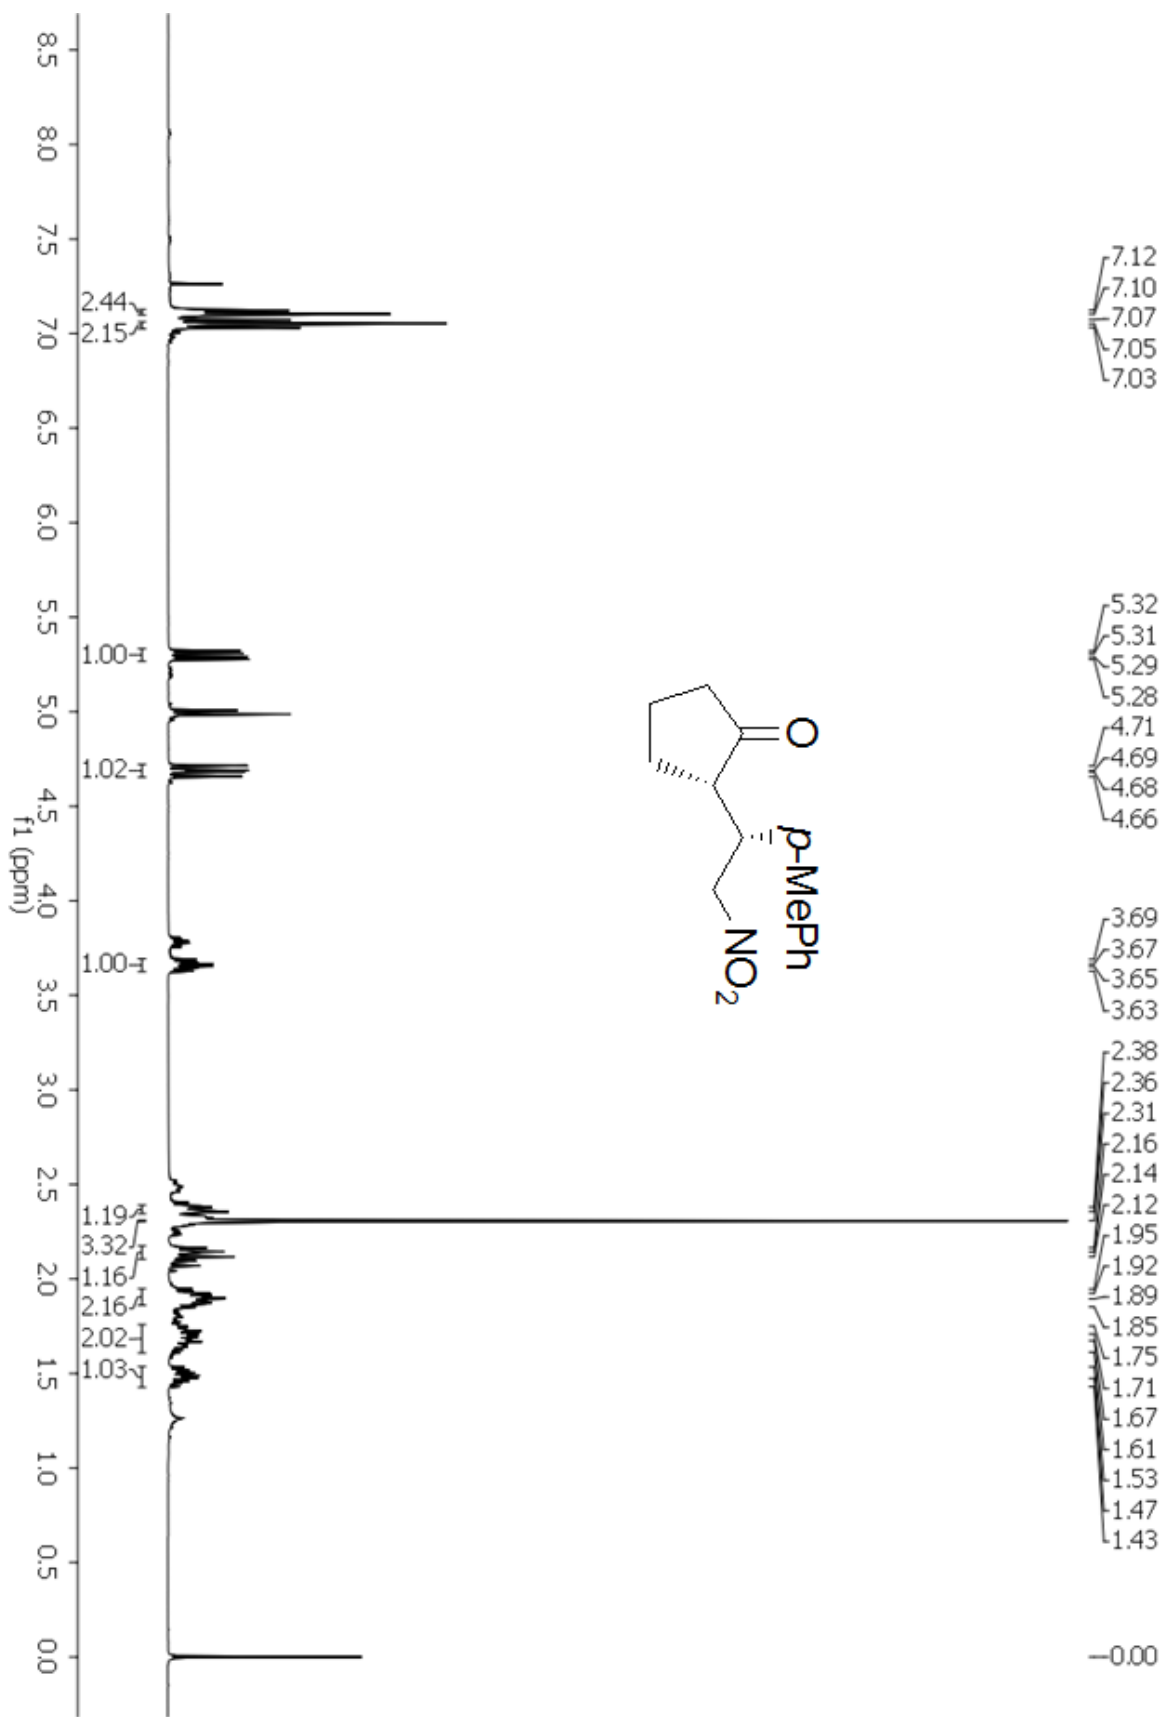

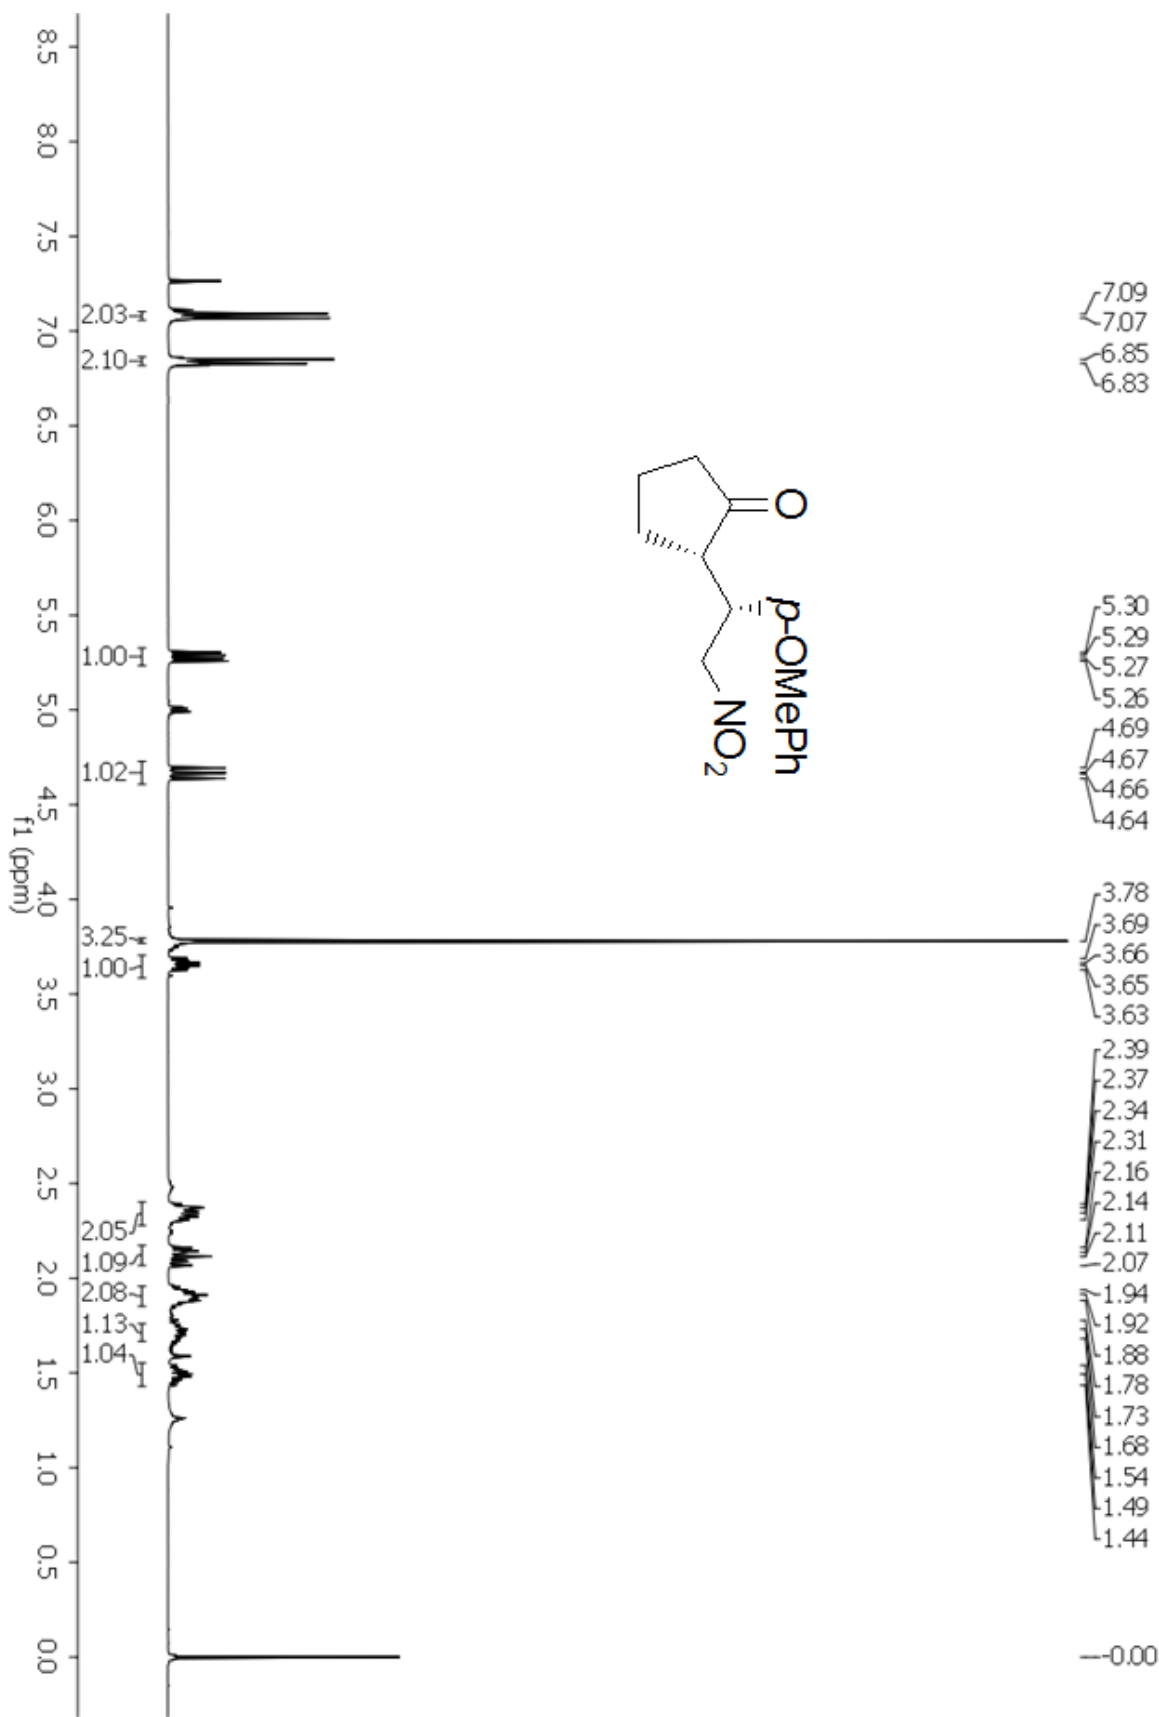

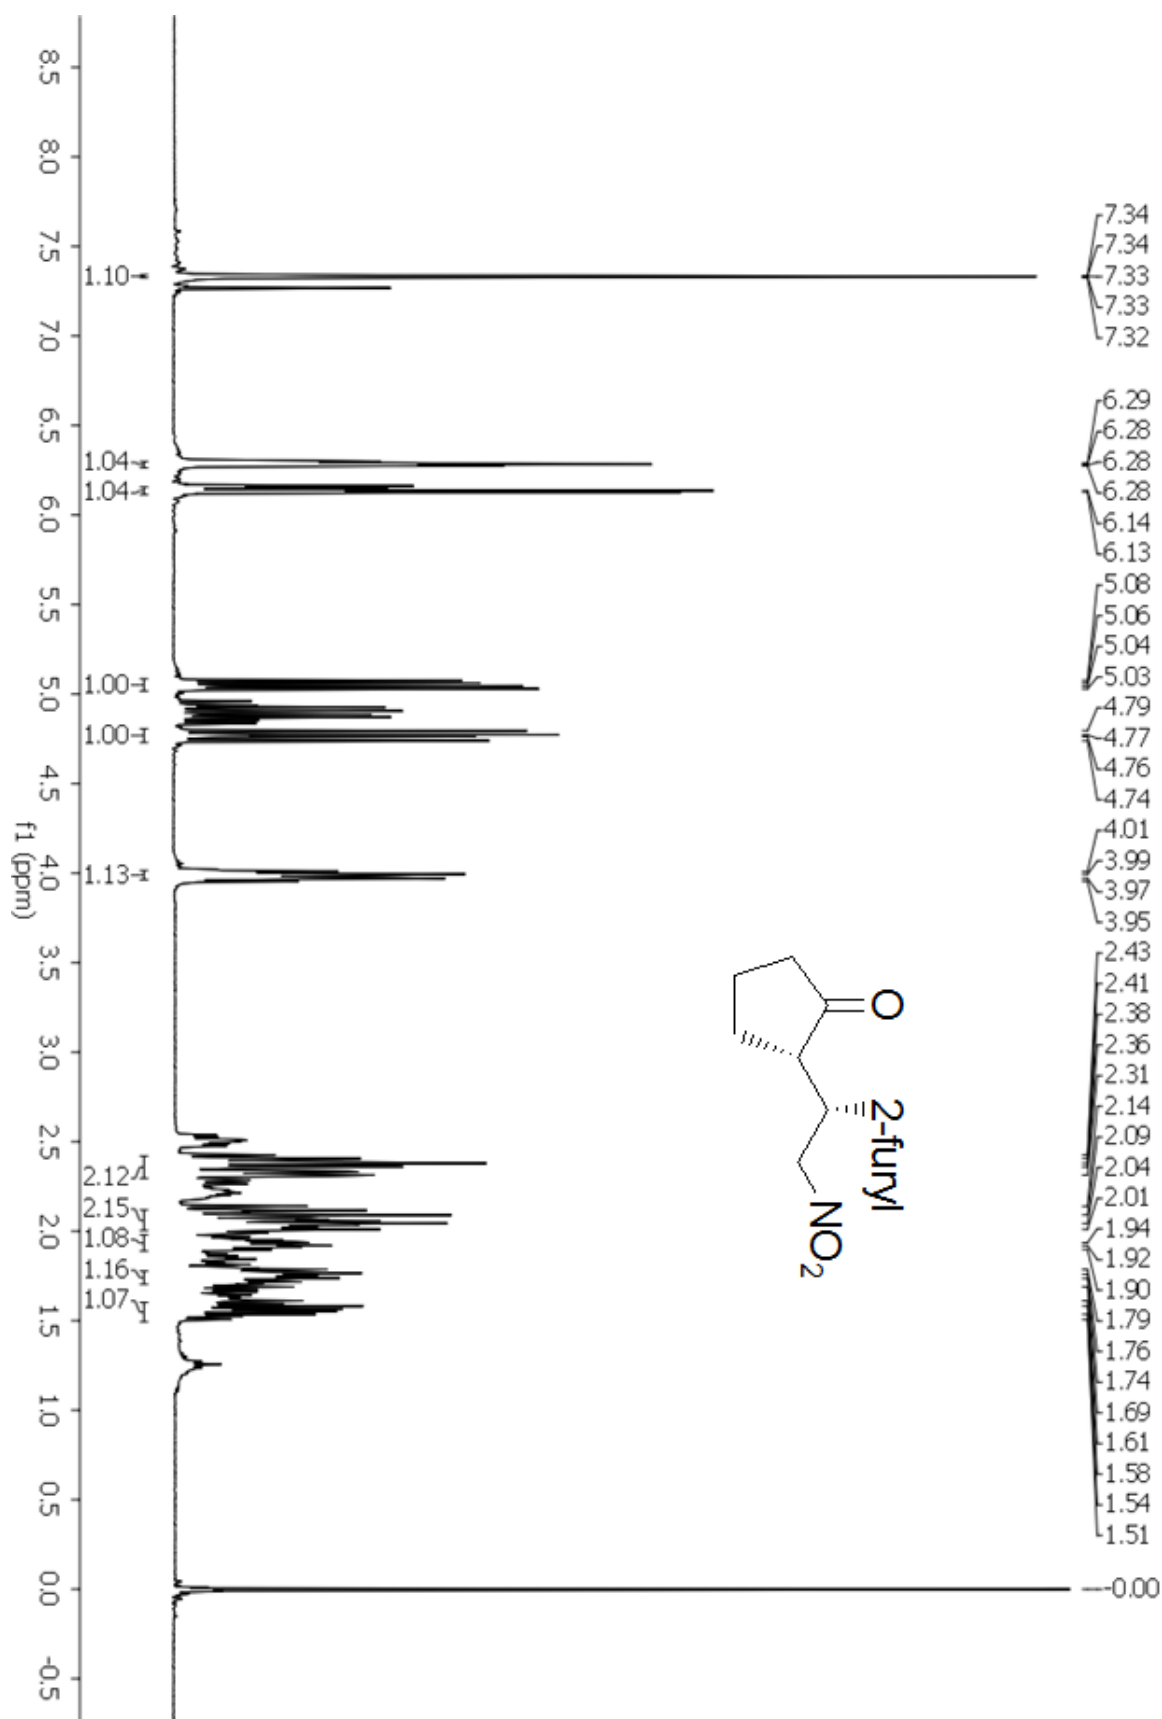

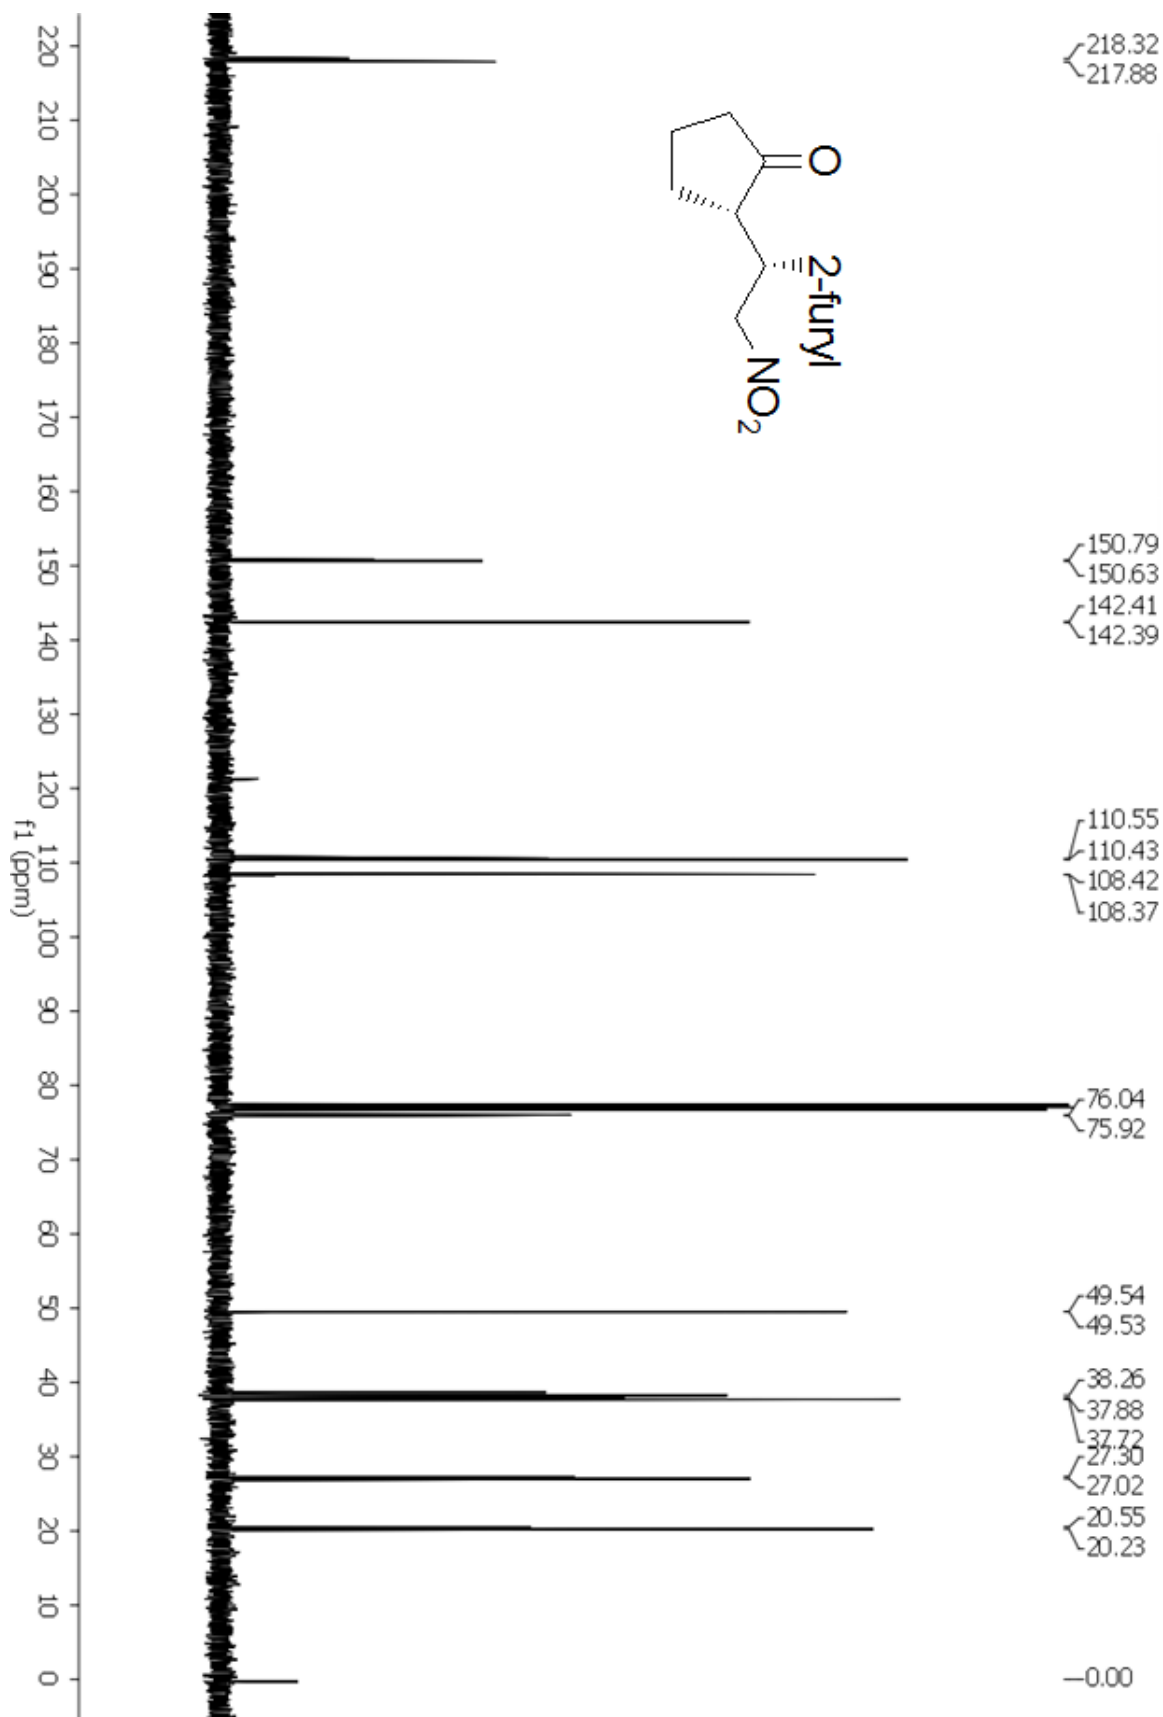

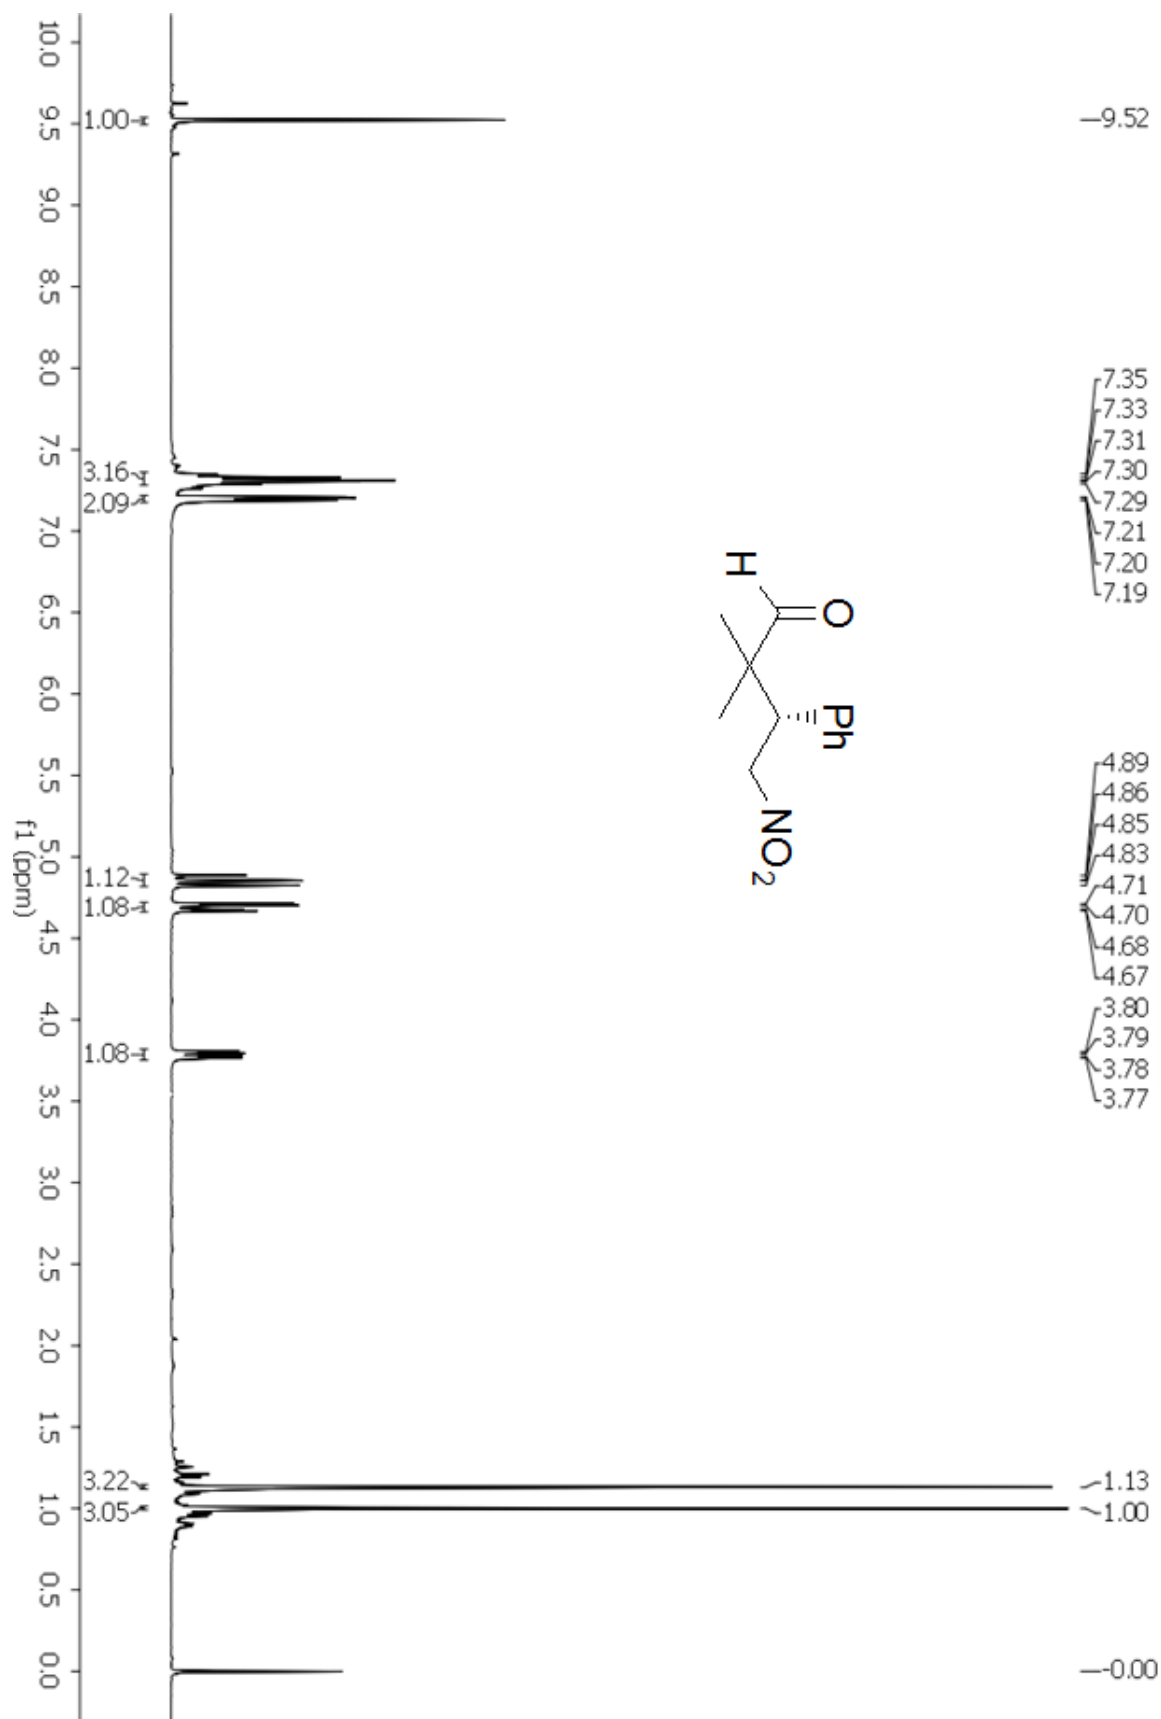



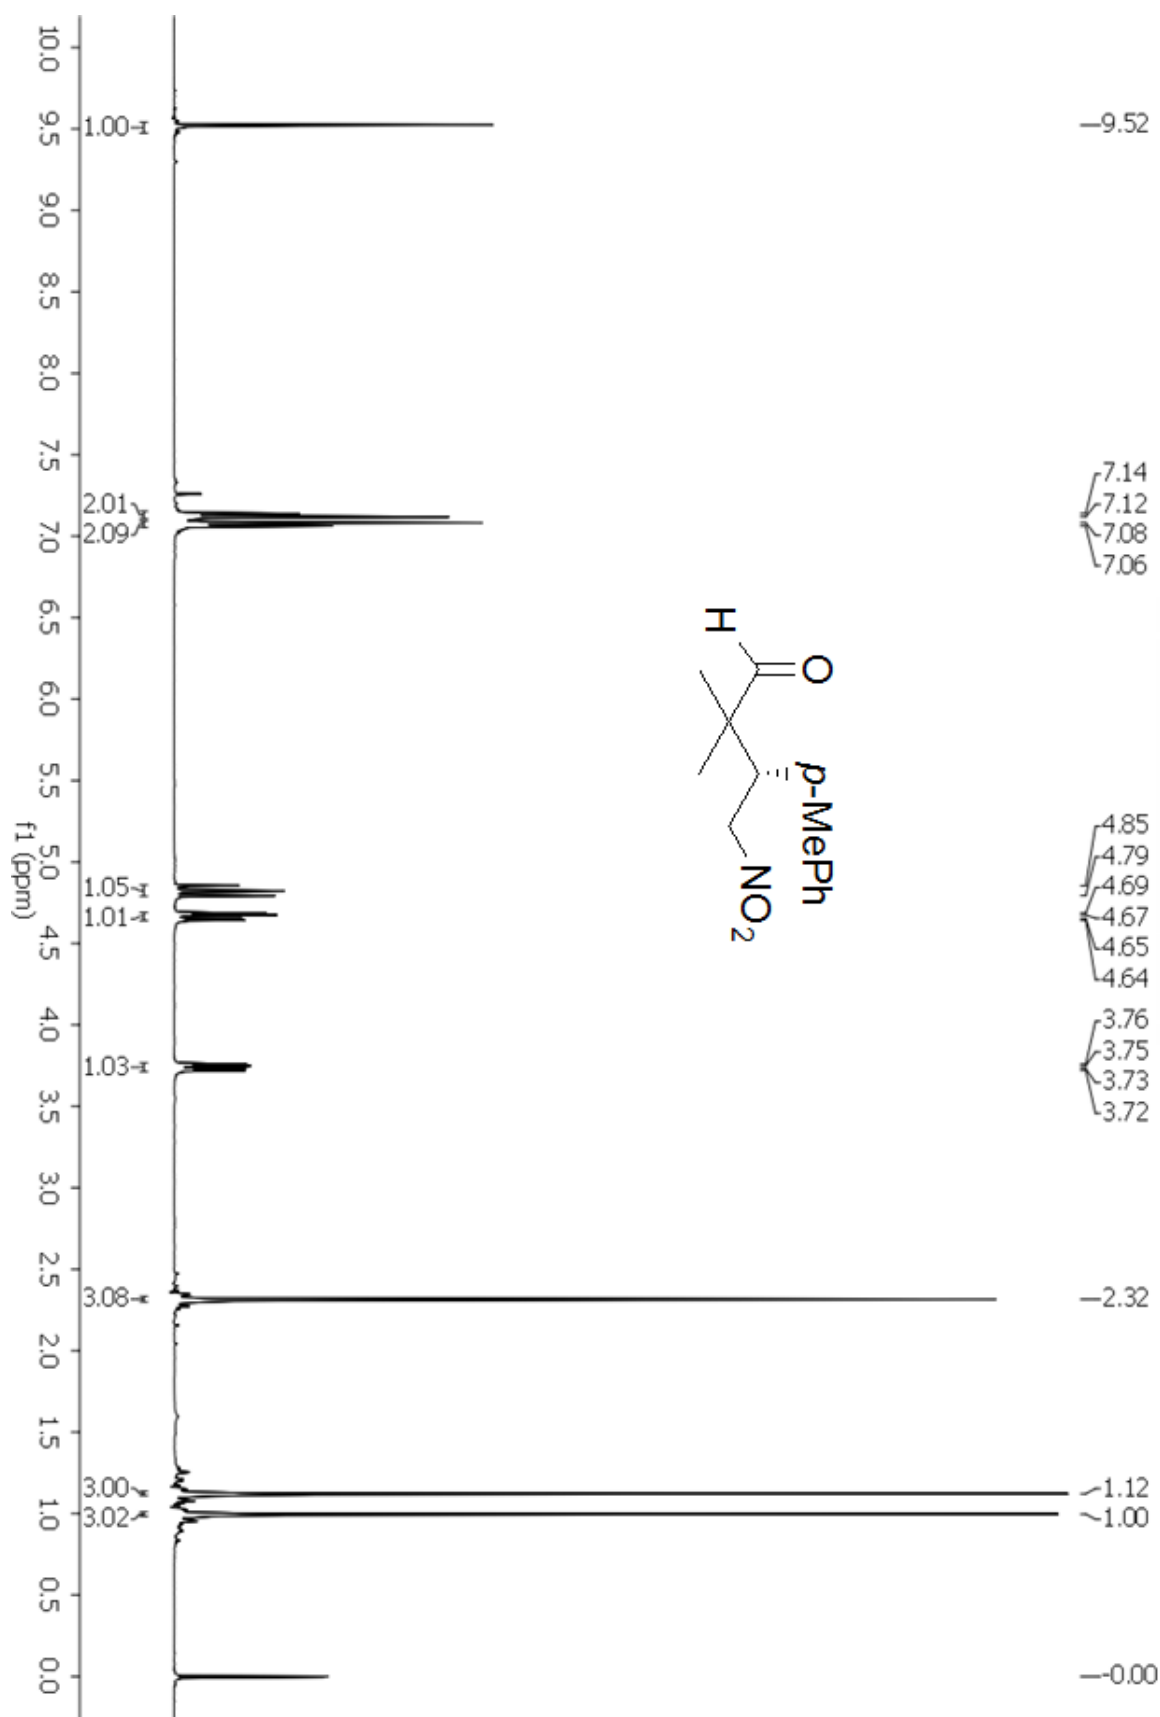

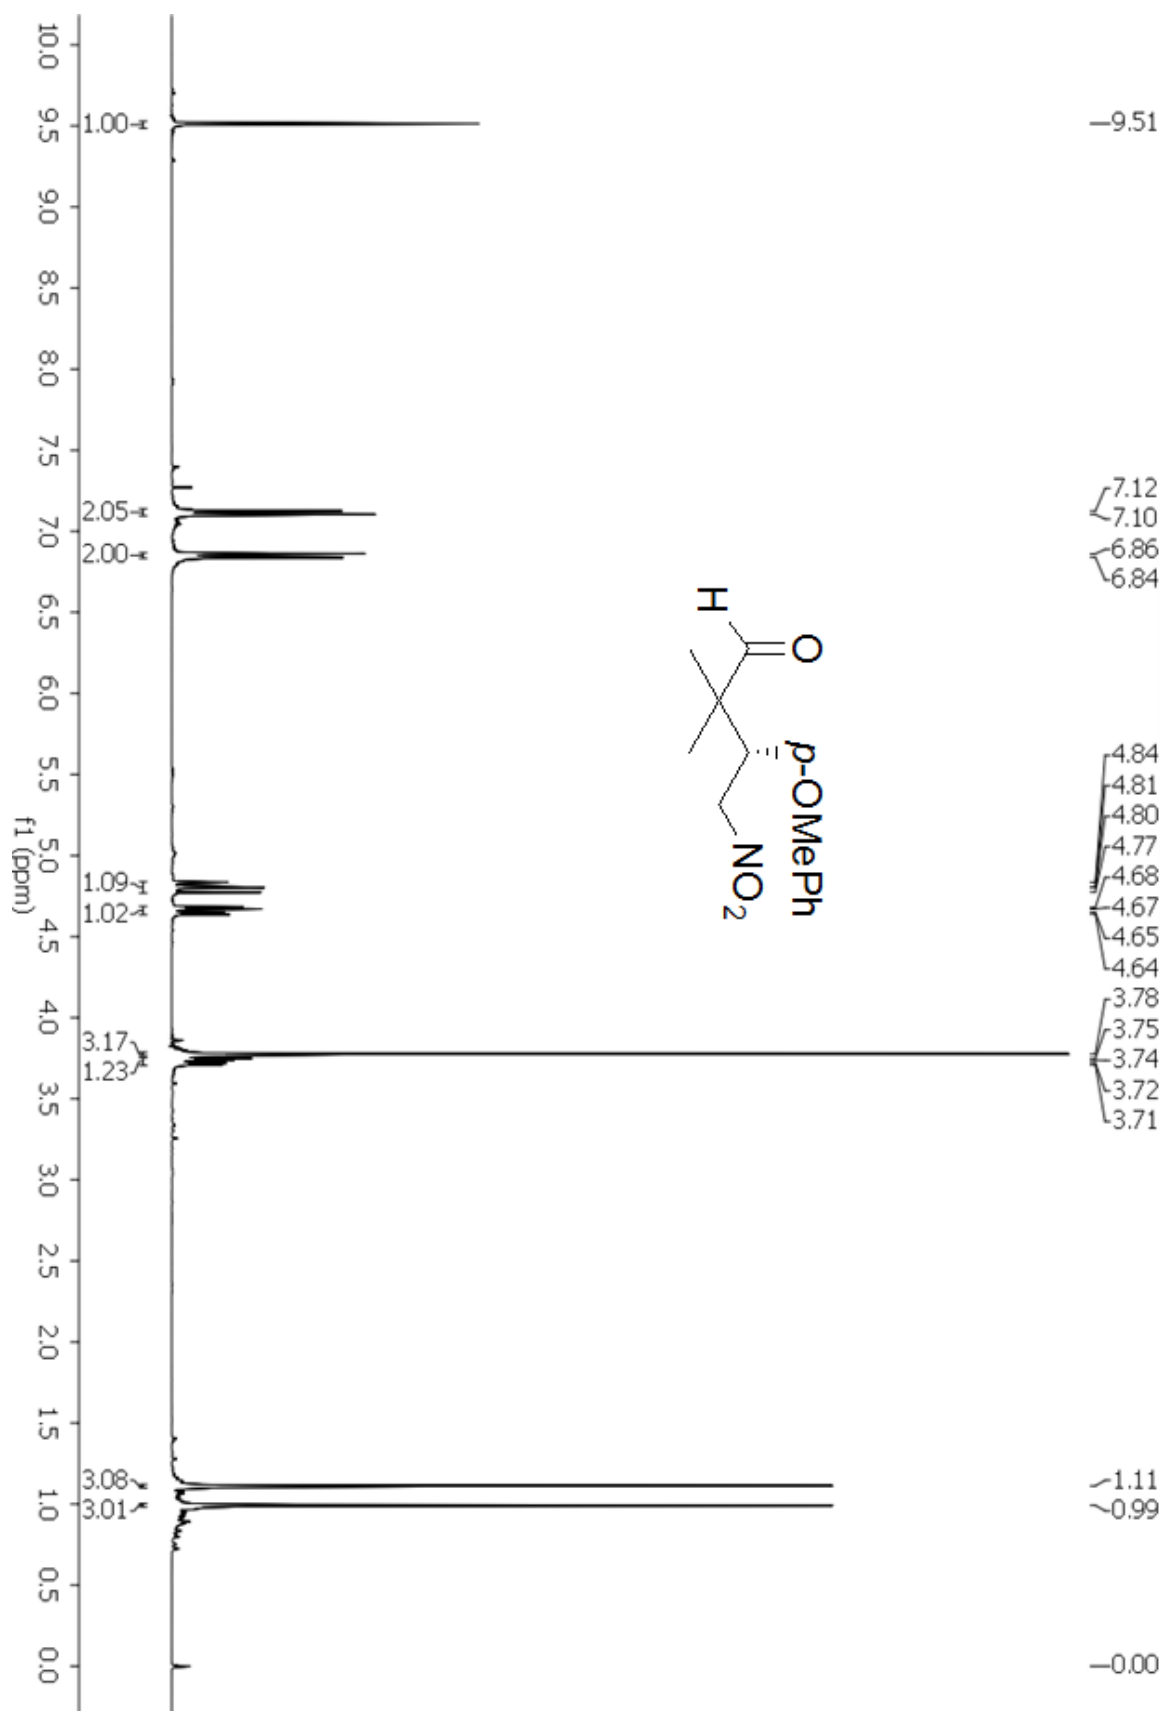

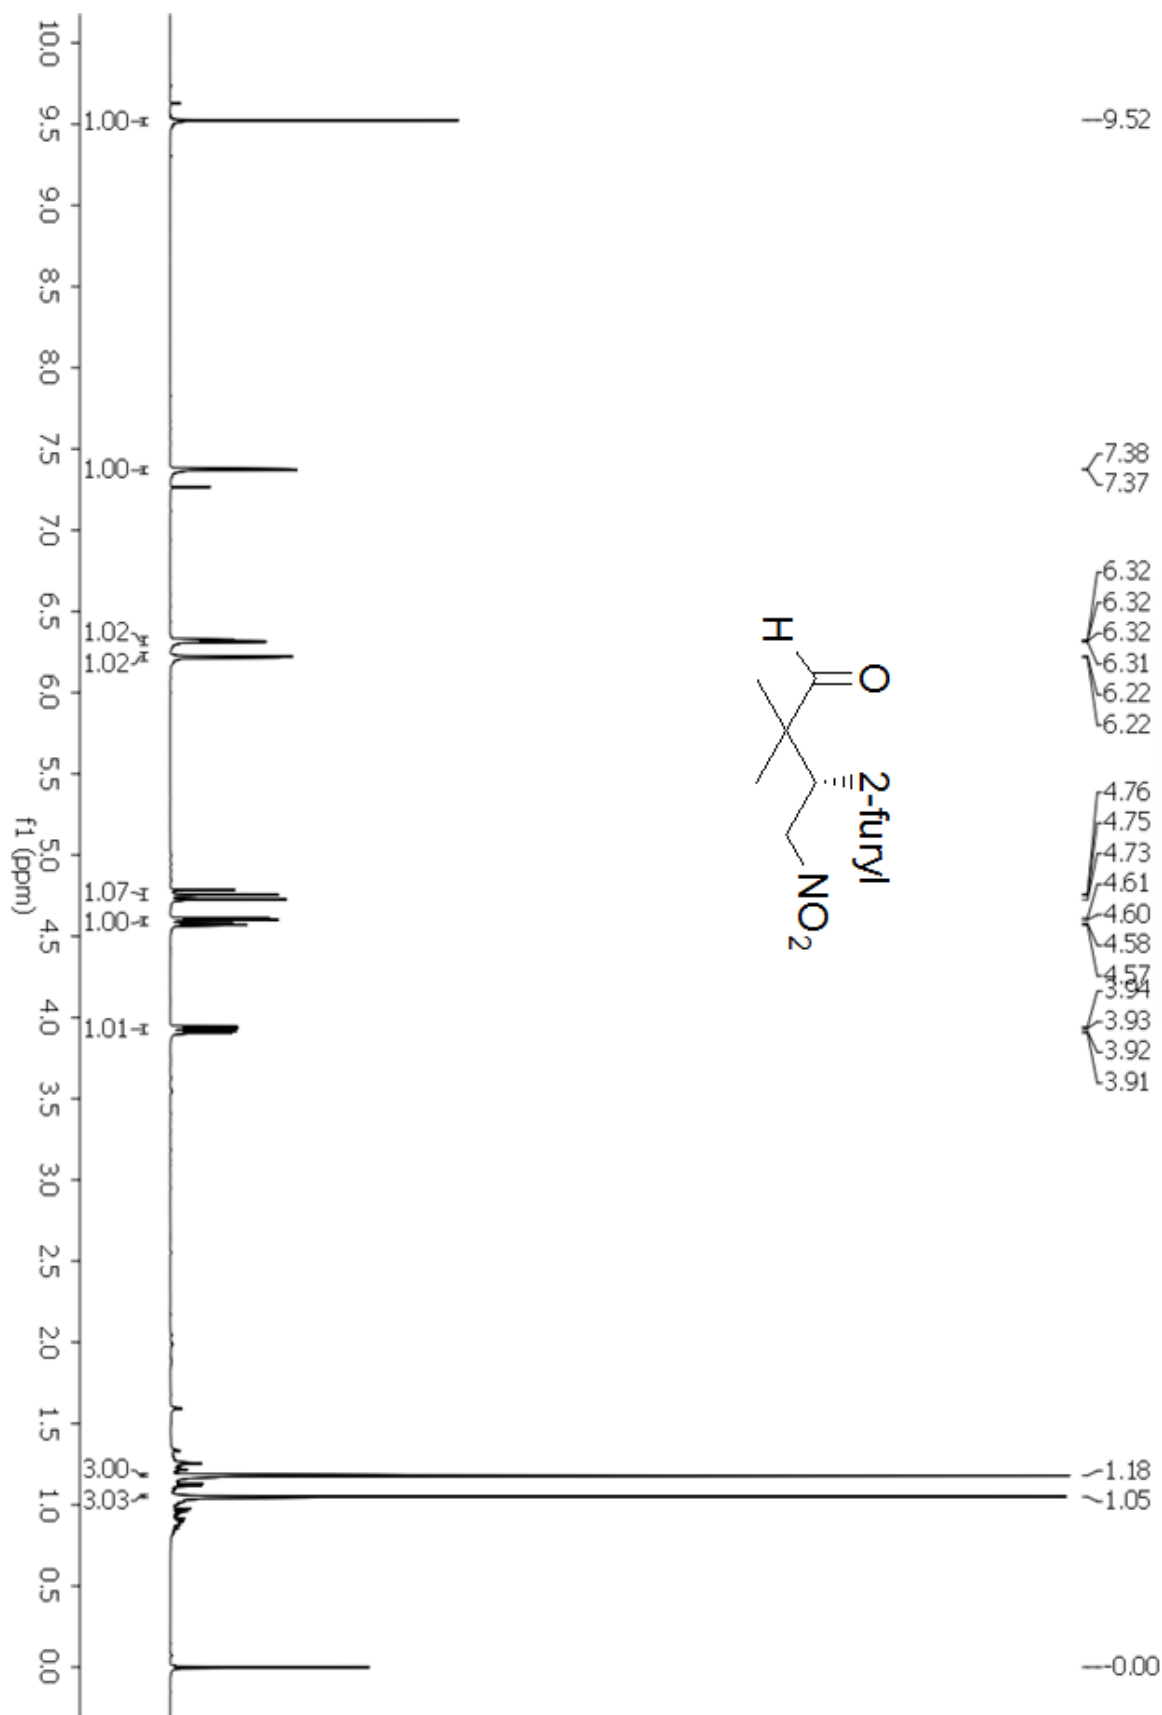

## HPLC and NMR data for aldol products

HPLC of racemic 2-hydroxy(4-nitrophenyl)methylcyclohexanone (**7a**)

Note **7a** is only included as a reference, we have previously reported **7a**.

**7b**, **7c**, **8a-c**, **9a-c** we report here for the first time.

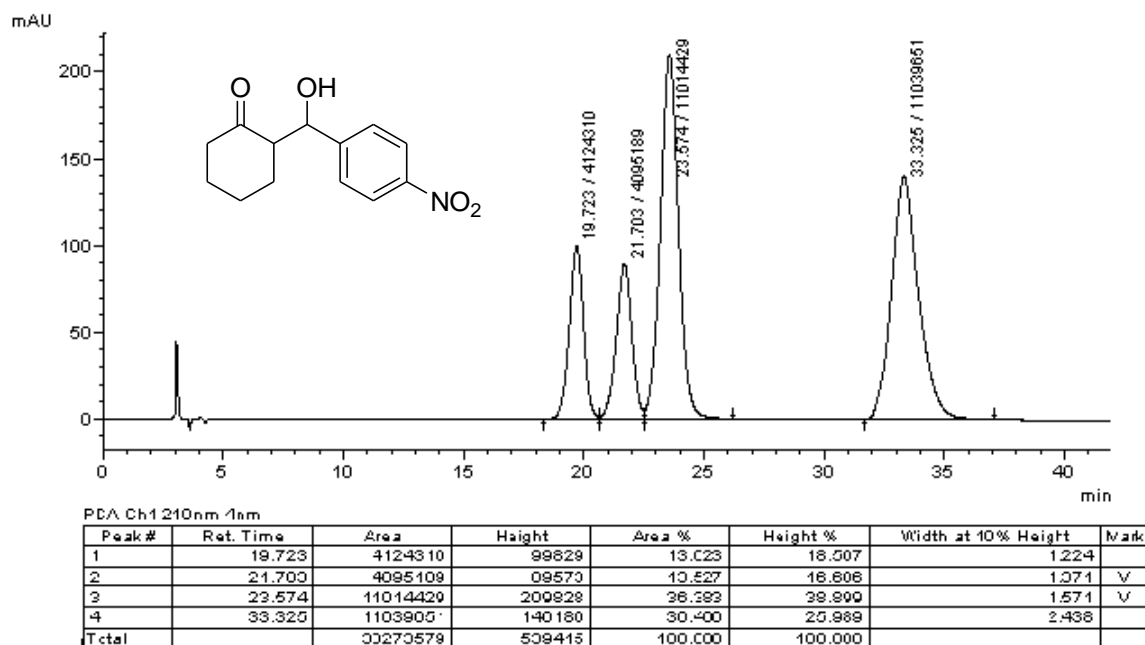

HPLC of (S)-2-((R)-hydroxy(4-nitrophenyl)methyl)cyclohexanone (**7a**)

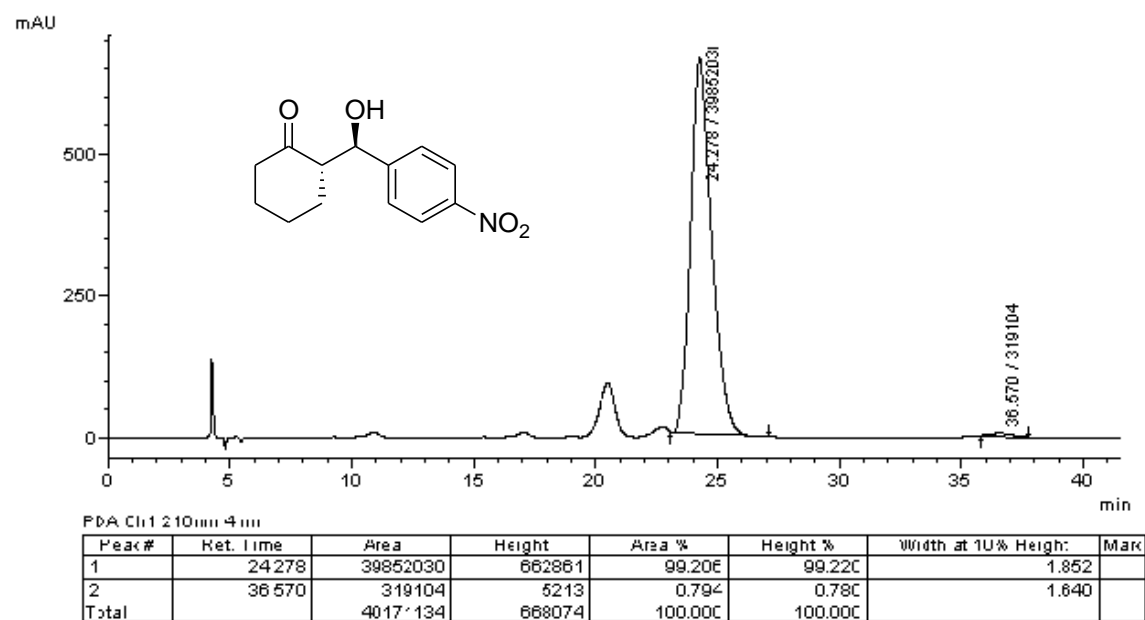

Crude <sup>1</sup>H NMR of (S)-2-((R)-hydroxy(4-nitrophenyl)methyl)cyclohexanone for dr assesement

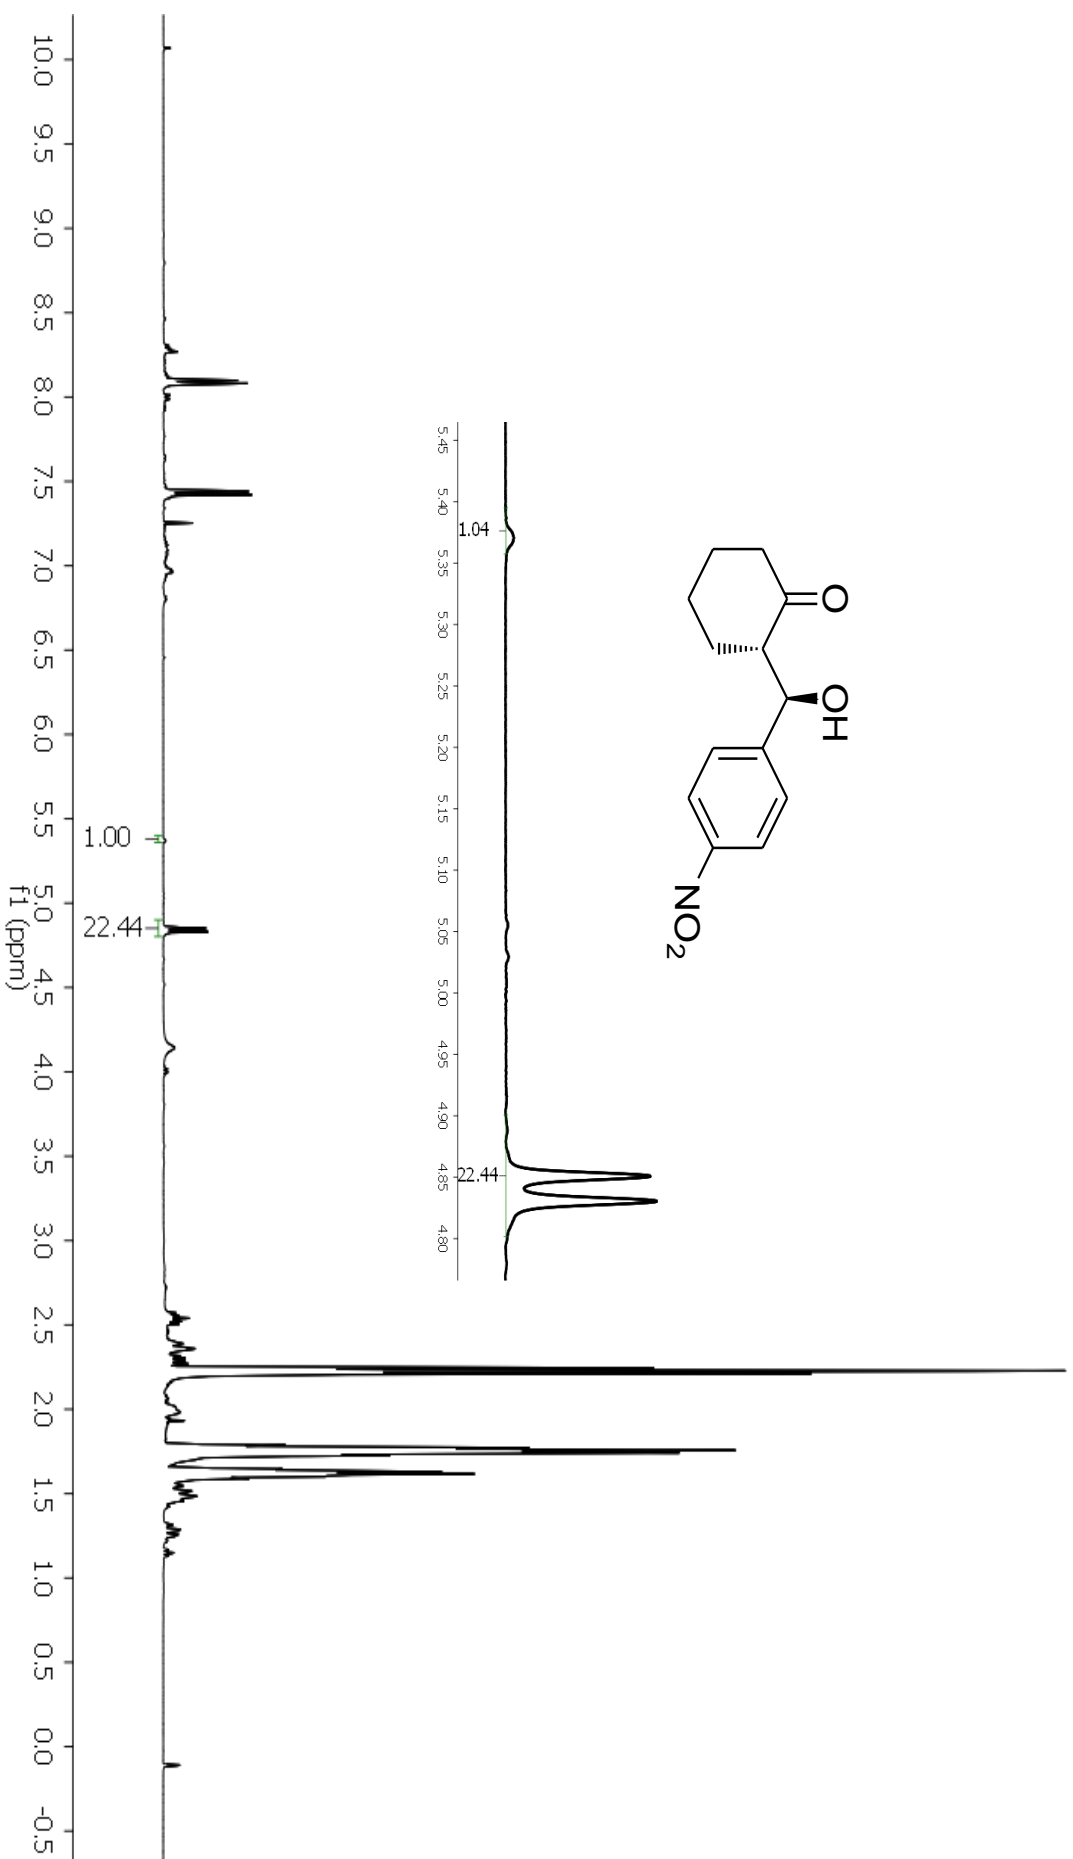

<sup>1</sup>H NMR of (S)-2-((R)-hydroxy(4-nitrophenyl)methyl)cyclohexanone after column chromatography

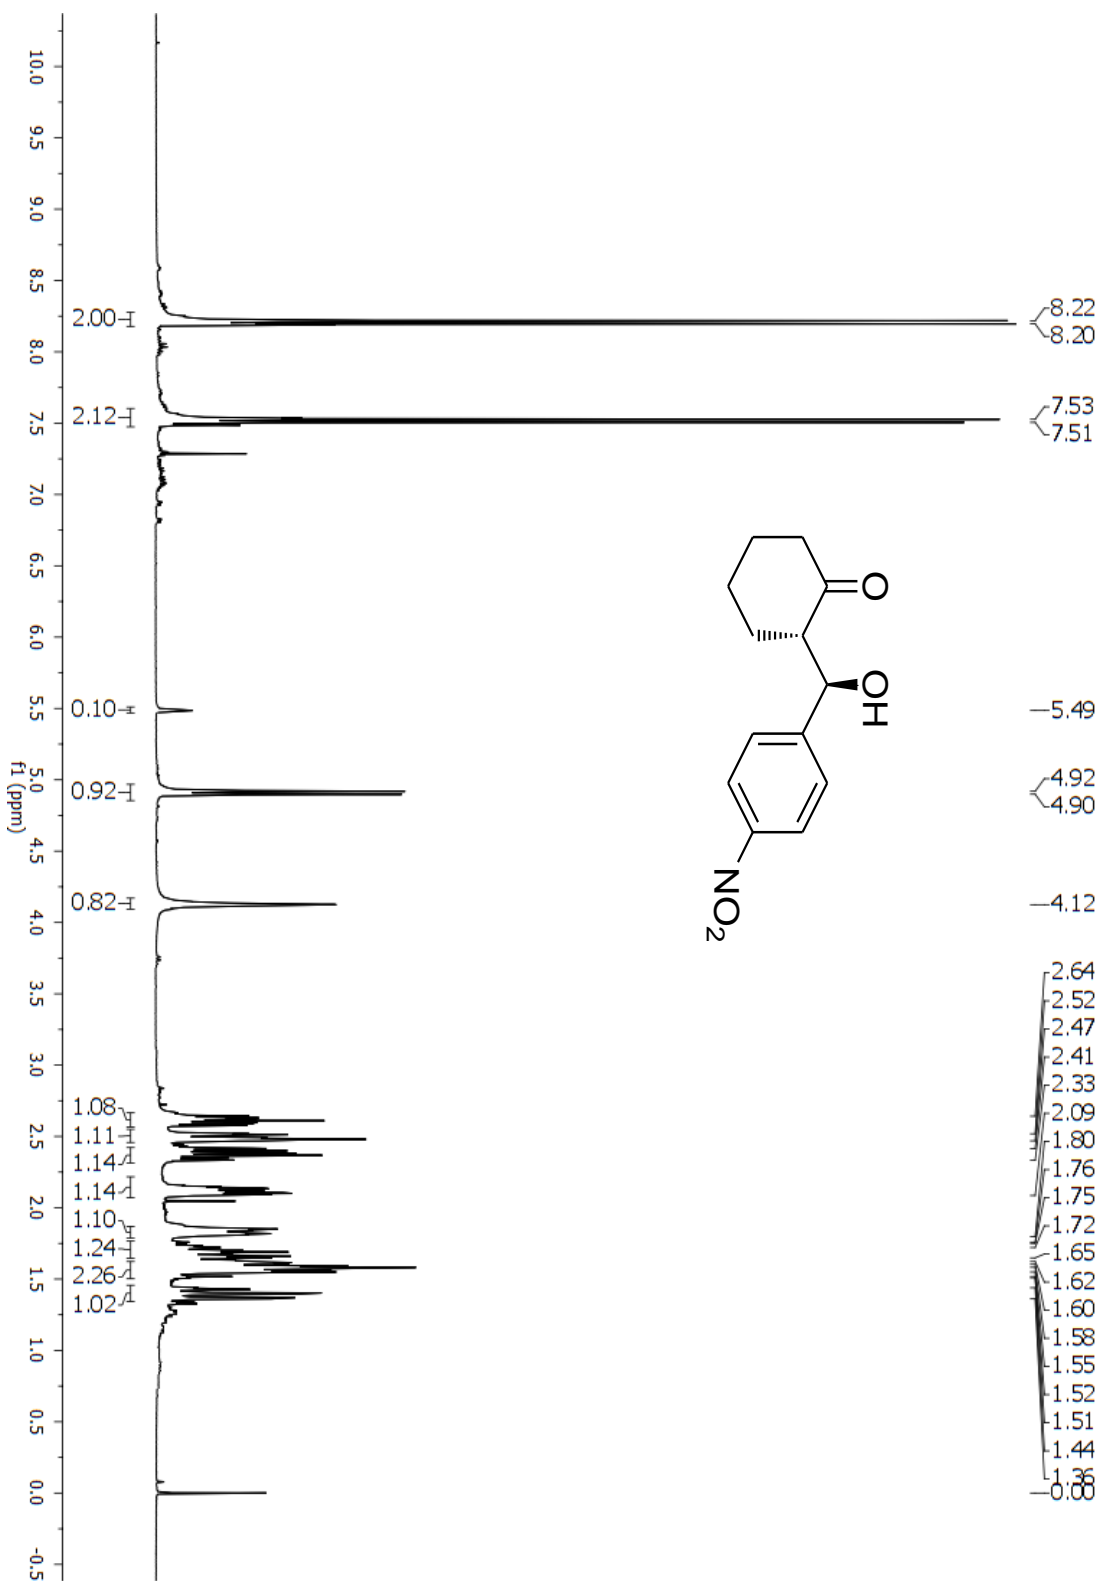

### HPLC of racemic 2-(hydroxy(phenyl)methyl)cyclohexanone (**7b**)

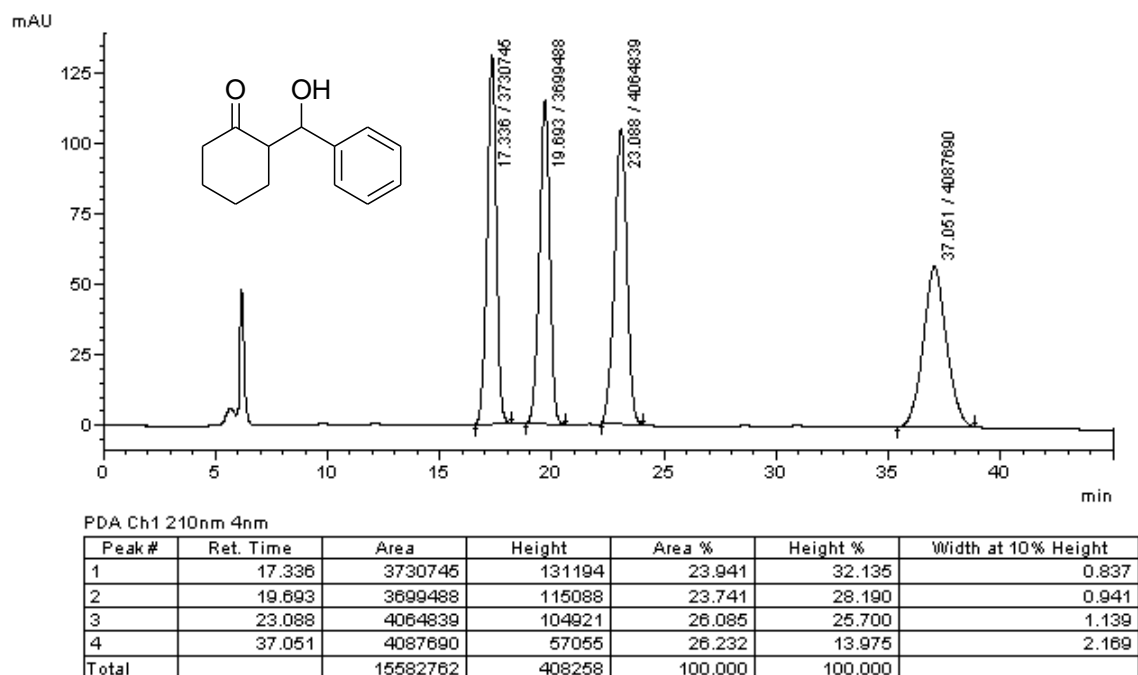

### HPLC of enantioenriched (S)-2-((R)-hydroxy(phenyl)methyl)cyclohexanone (**7b**)

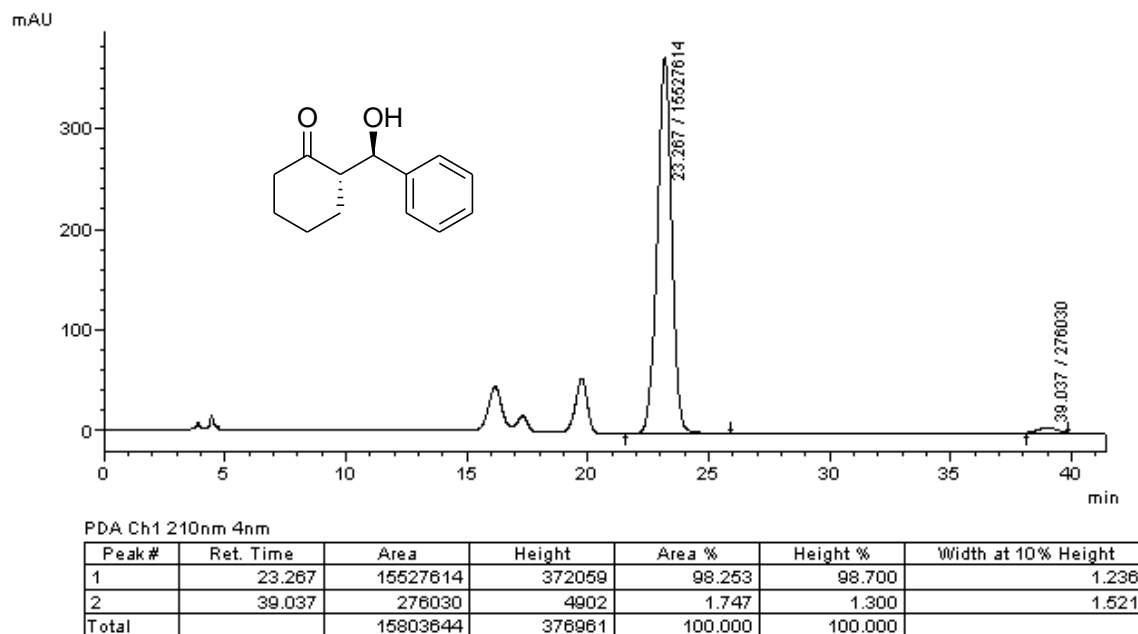

Crude <sup>1</sup>H NMR of (S)-2-((R)-hydroxy(phenyl)methyl)cyclohexanone for dr assessment

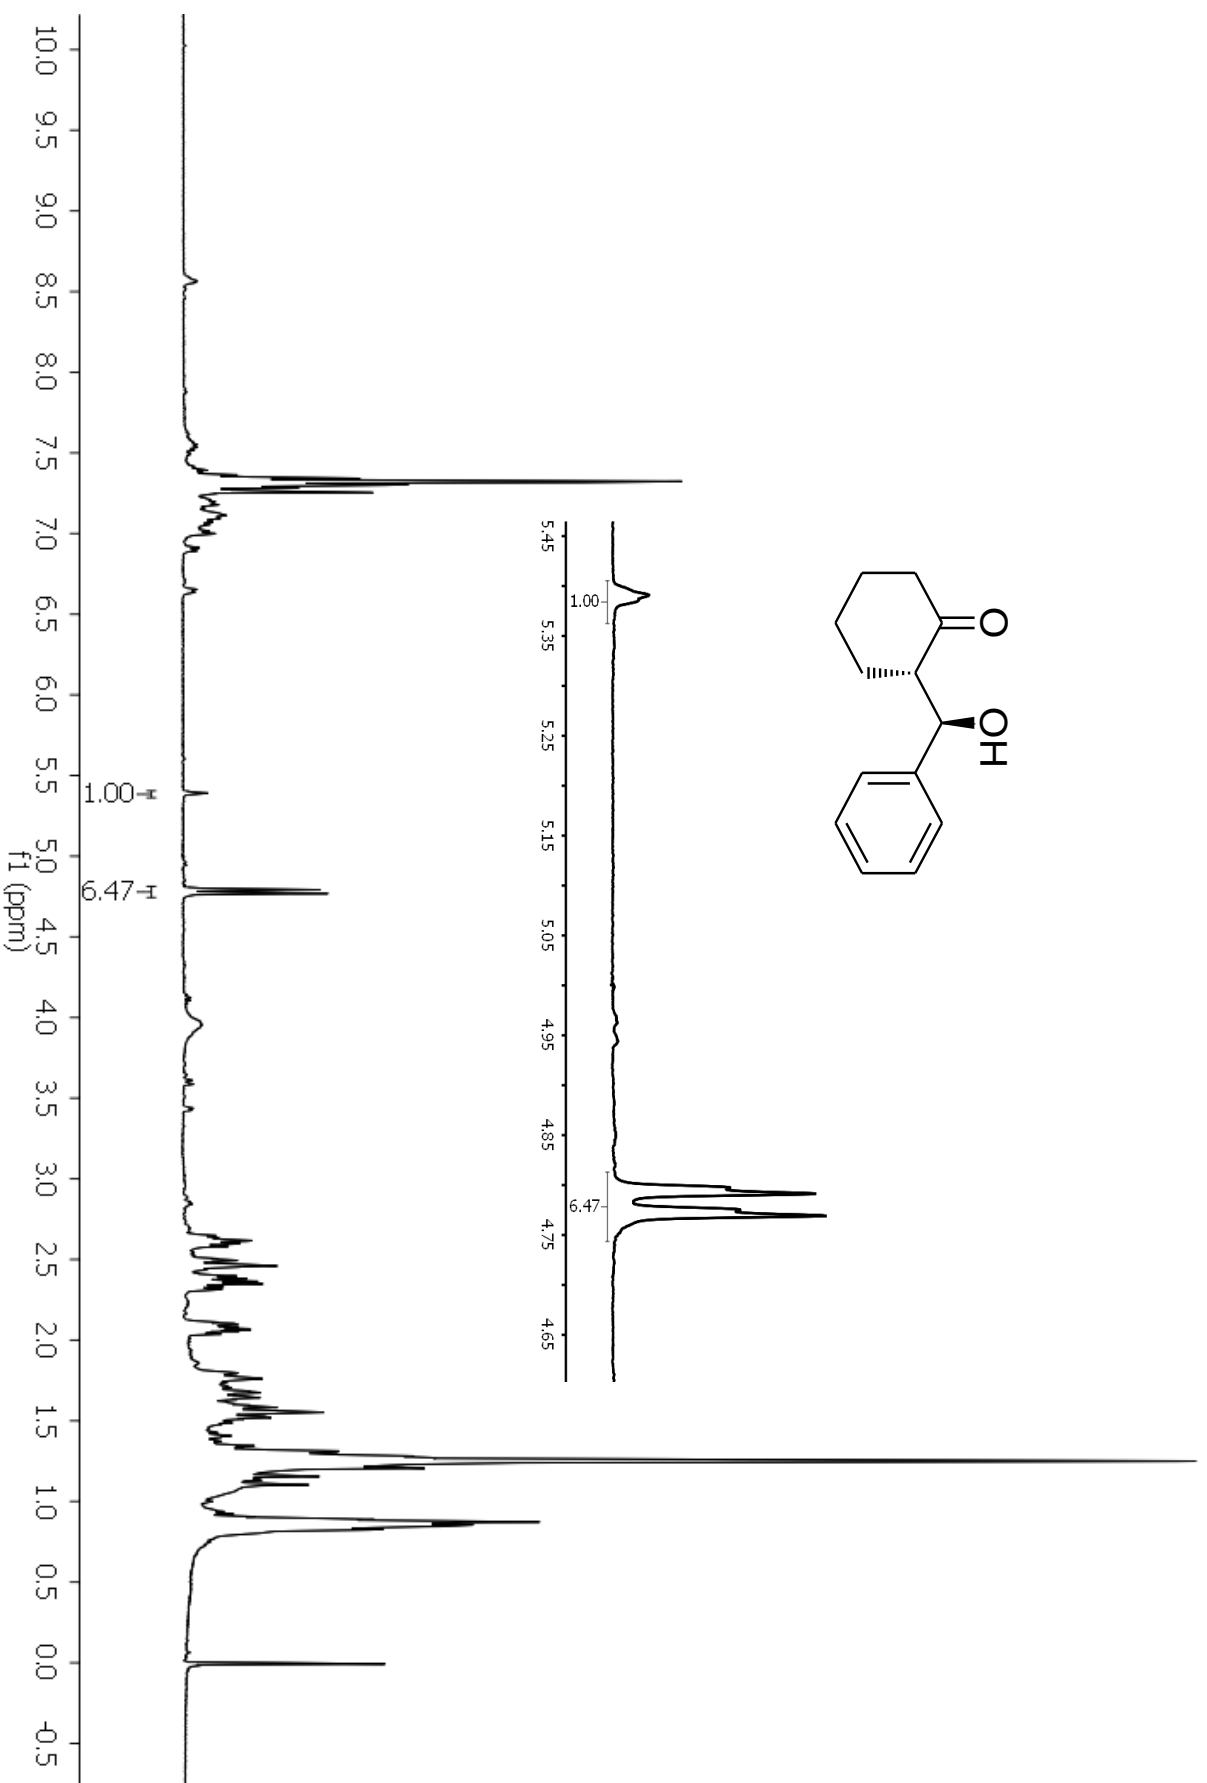



<sup>1</sup>H NMR of (S)-2-((R)-hydroxy(phenyl)methyl)cyclohexanone after column chromatography

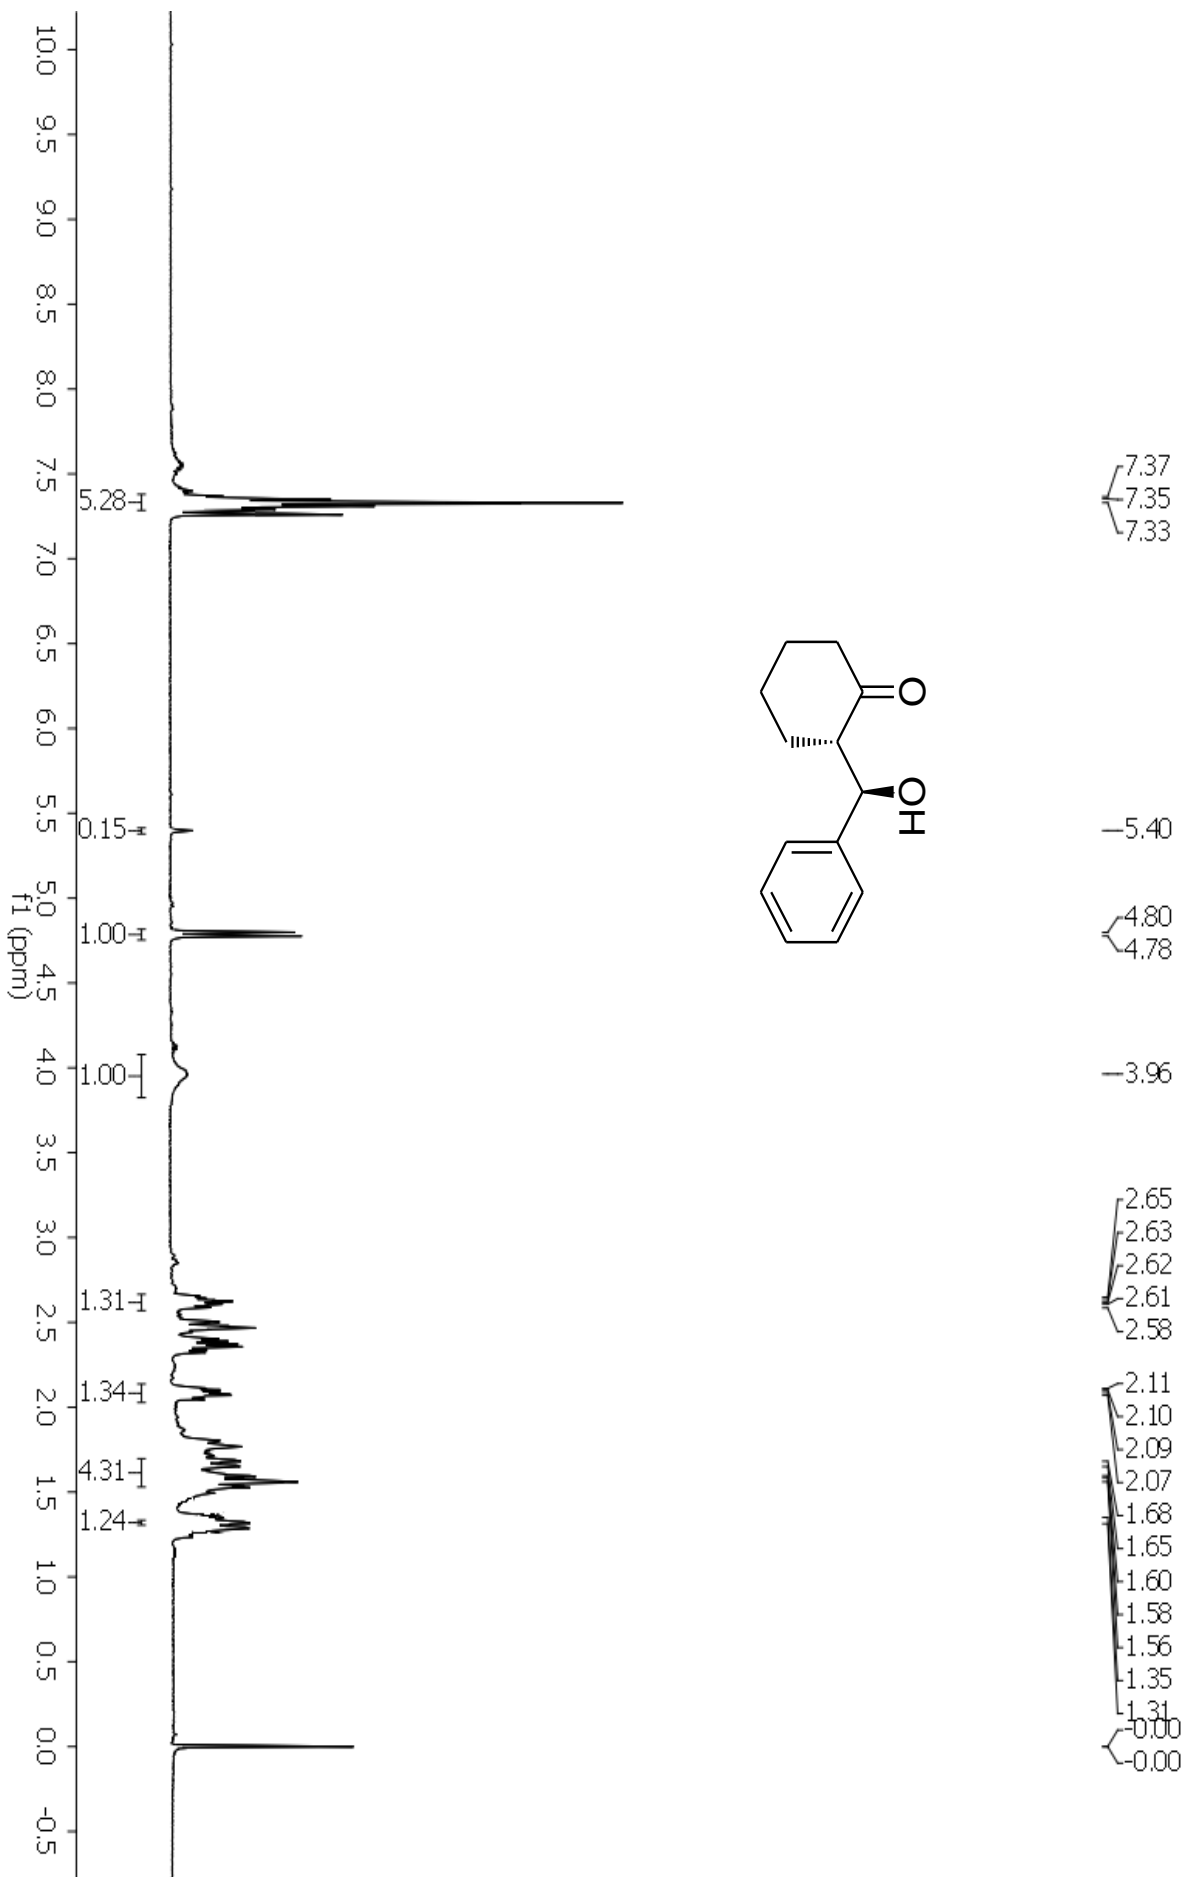

### HPLC of racemic 2-(hydroxy(naphthalen-3-yl)methyl)cyclohexanone (**7c**)

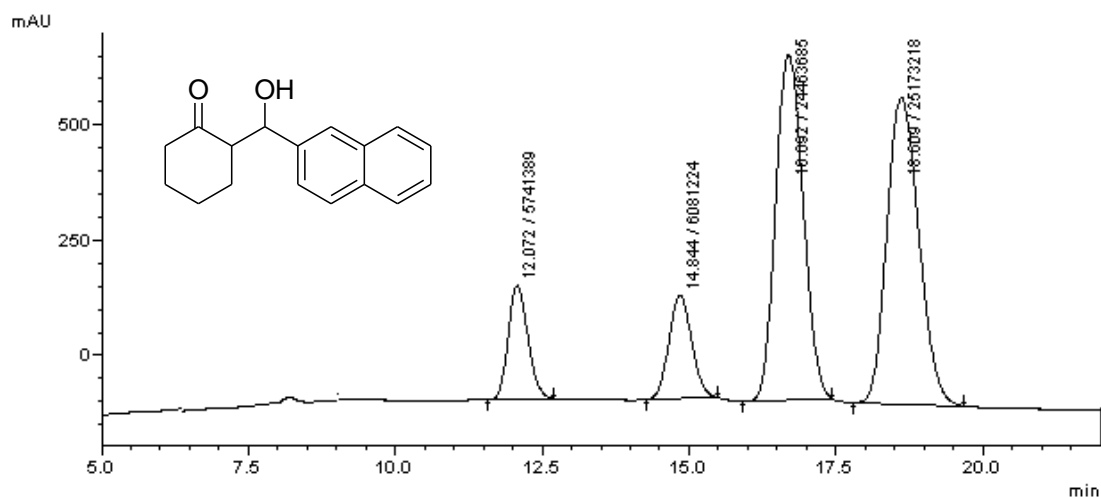

PDA Ch1 210nm 4nm

| Peak # | Ret. Time | Area     | Height  | Area %  | Height % |
|--------|-----------|----------|---------|---------|----------|
| 1      | 12.072    | 5741389  | 246086  | 9.342   | 13.067   |
| 2      | 14.844    | 6081224  | 224291  | 9.895   | 11.910   |
| 3      | 16.692    | 24463685 | 748774  | 39.805  | 39.760   |
| 4      | 18.609    | 25173218 | 664061  | 40.959  | 35.262   |
| Total  |           | 61459516 | 1883211 | 100.000 | 100.000  |

### HPLC of (S)-2-((R)-hydroxy(naphthalen-3-yl)methyl) cyclohexanone (**7c**)

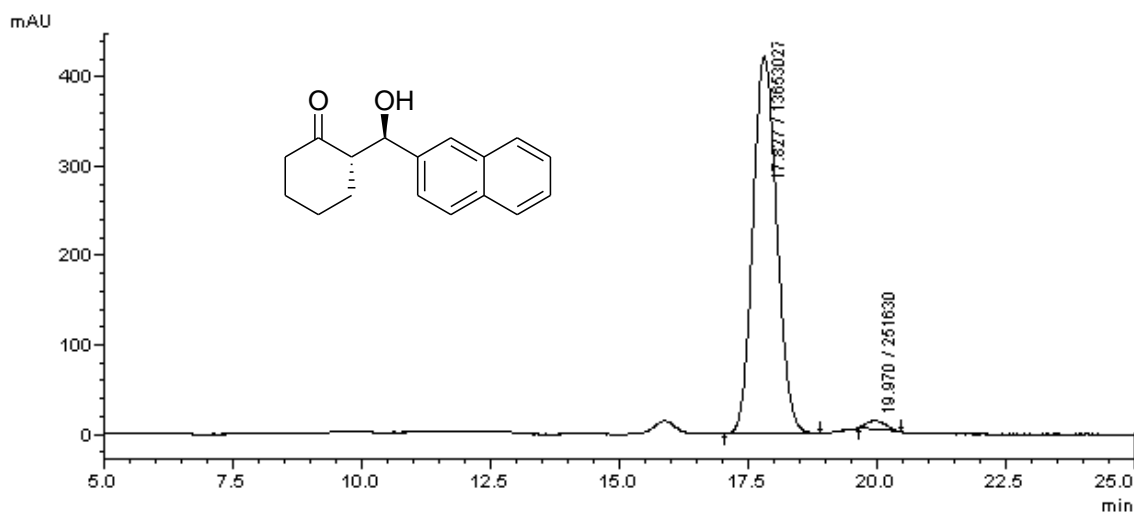

PDA Ch1 210nm 4nm

| Peak # | Ret. Time | Area     | Height | Area %  | Height % |
|--------|-----------|----------|--------|---------|----------|
| 1      | 17.827    | 13653027 | 422224 | 98.190  | 97.832   |
| 2      | 19.970    | 251630   | 9357   | 1.810   | 2.168    |
| Total  |           | 13904657 | 431581 | 100.000 | 100.000  |

Crude <sup>1</sup>H NMR of (S)-2-((R)-hydroxy(naphthalen-3-yl)methyl)cyclohexanone for dr assessment

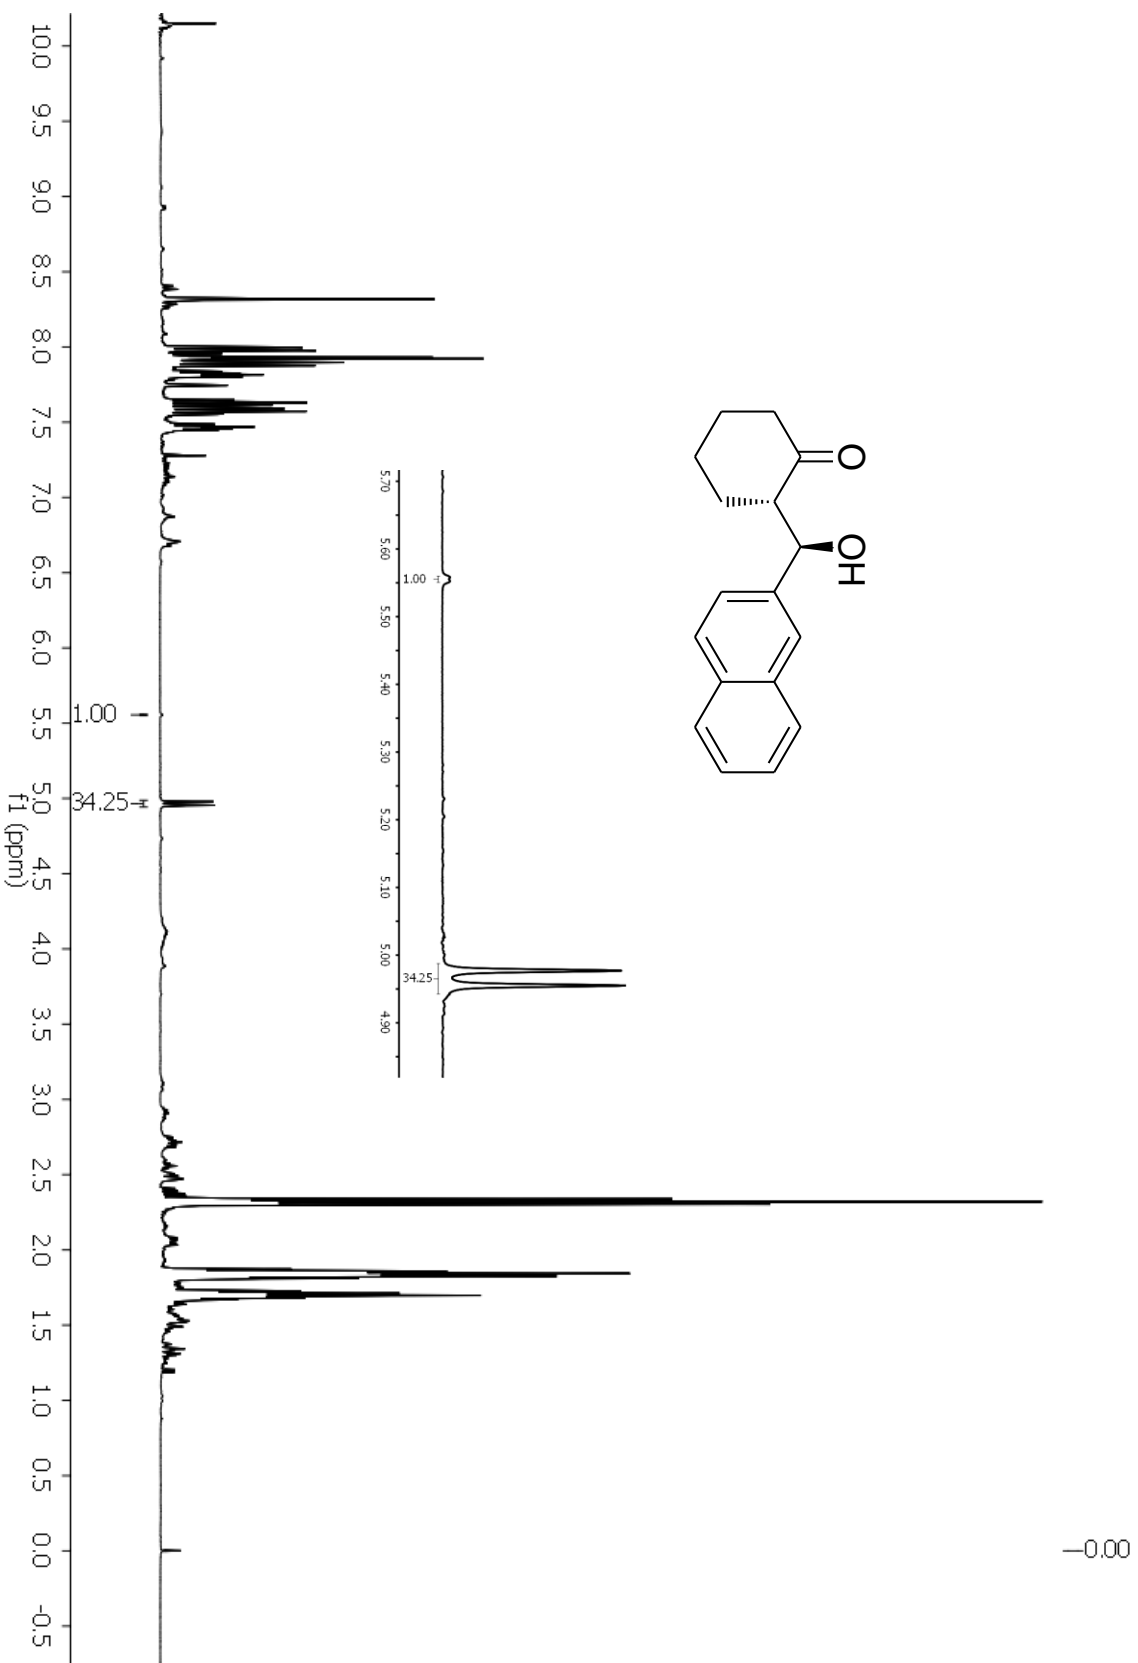

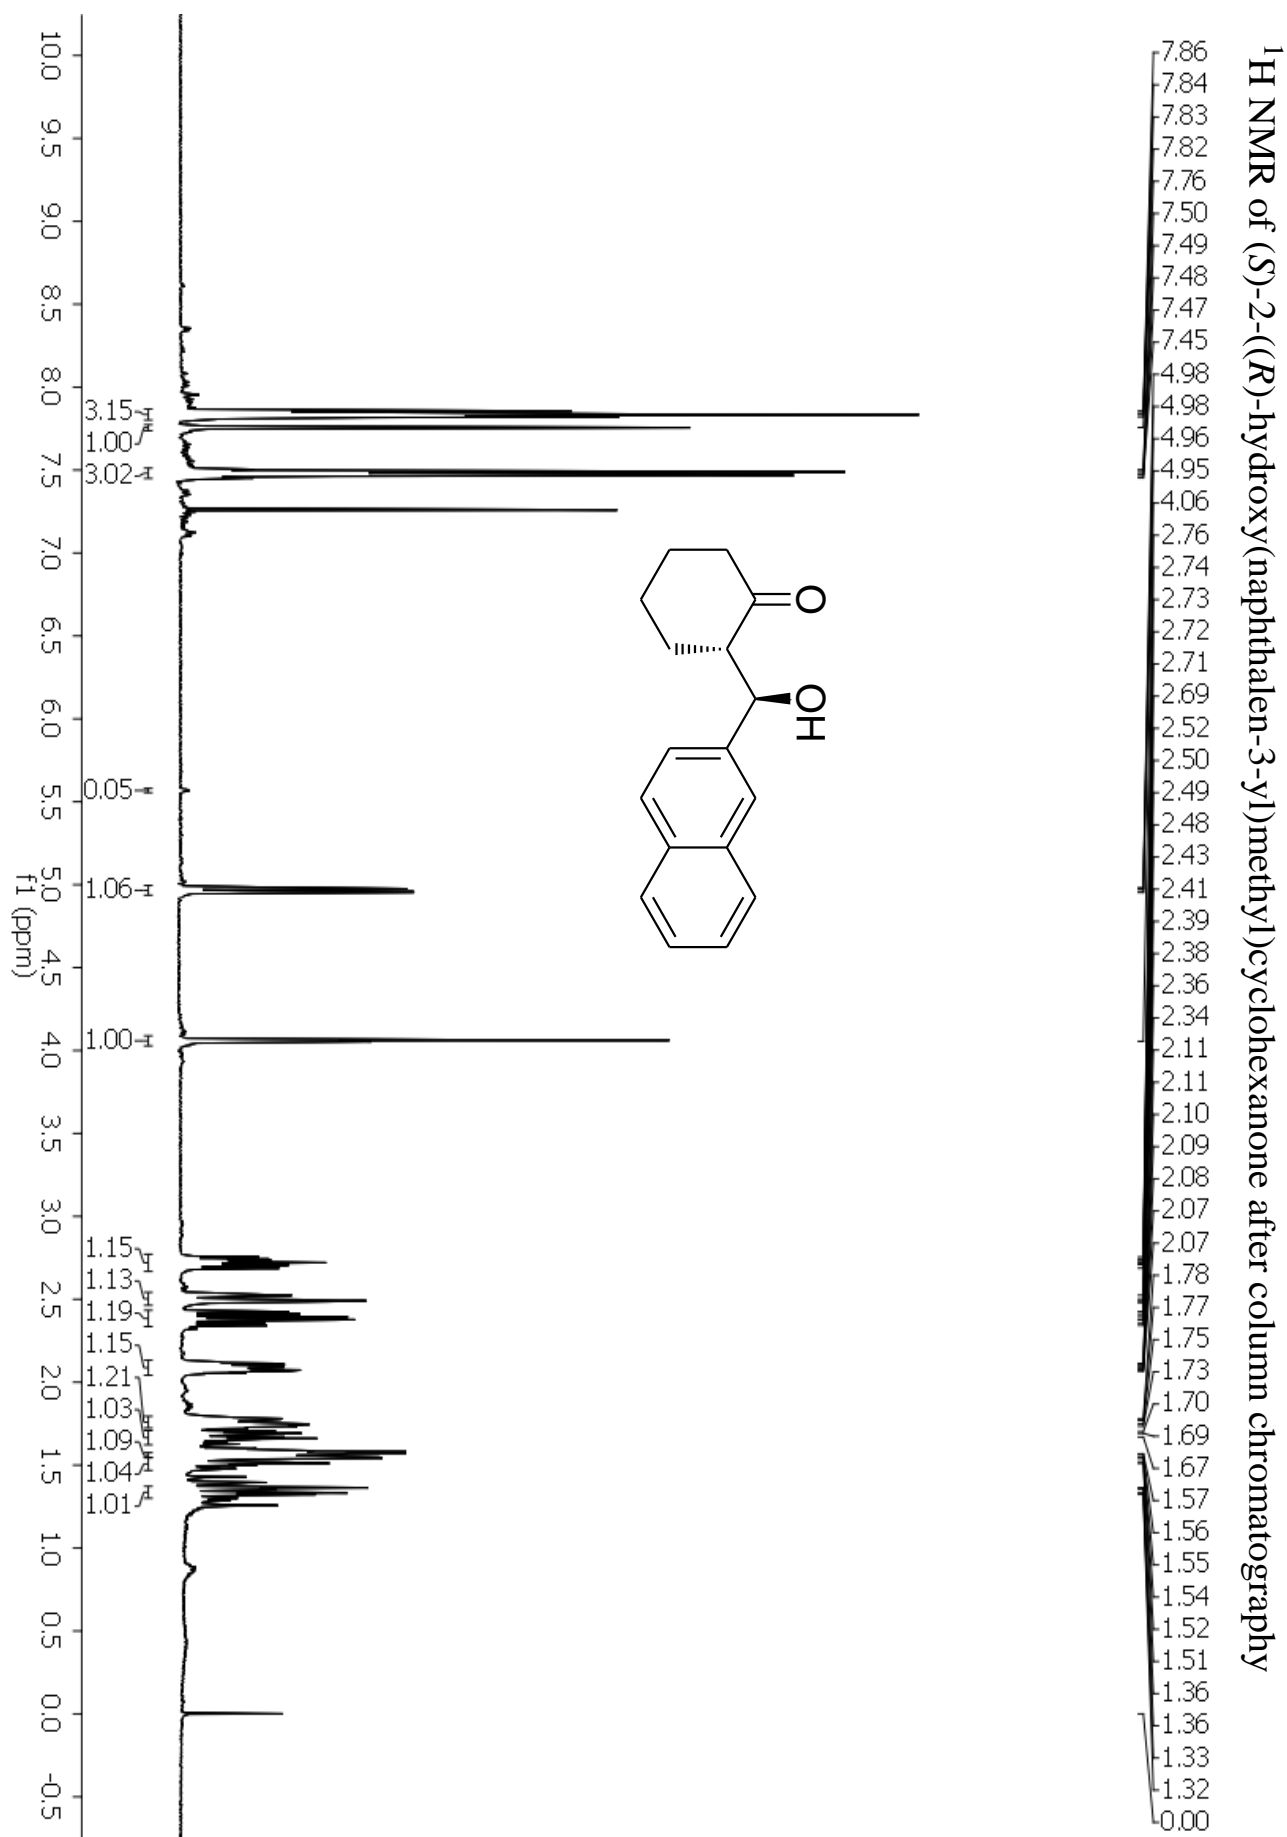

### HPLC of racemic tetrahydro-3-(hydroxy(4-nitrophenyl)methyl)thiopyran-4-one (**8a**)

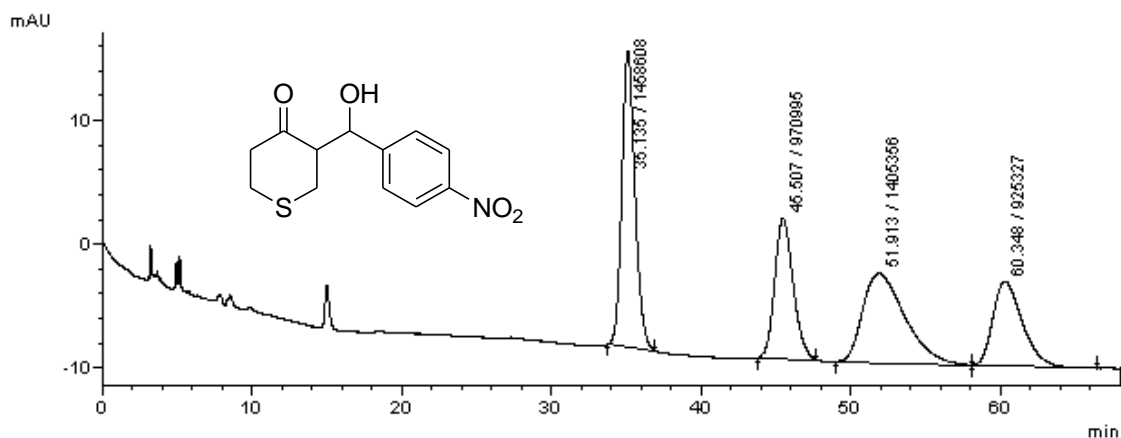

PDA Ch1 254nm 4nm

| Peak # | Ret. Time | Area    | Height | Area %  | Height % | Width at 10% Height |
|--------|-----------|---------|--------|---------|----------|---------------------|
| 1      | 35.135    | 1458608 | 23832  | 30.641  | 48.471   | 1.804               |
| 2      | 45.507    | 970995  | 11329  | 20.398  | 23.043   | 2.521               |
| 3      | 51.913    | 1405356 | 7208   | 29.523  | 14.659   | 5.677               |
| 4      | 60.348    | 925327  | 6798   | 19.438  | 13.827   | 3.989               |
| Total  |           | 4760286 | 49167  | 100.000 | 100.000  |                     |

### HPLC of (S)-tetrahydro-3-((R)-hydroxy(4-nitrophenyl)methyl) thiopyran-4-one (**8a**)

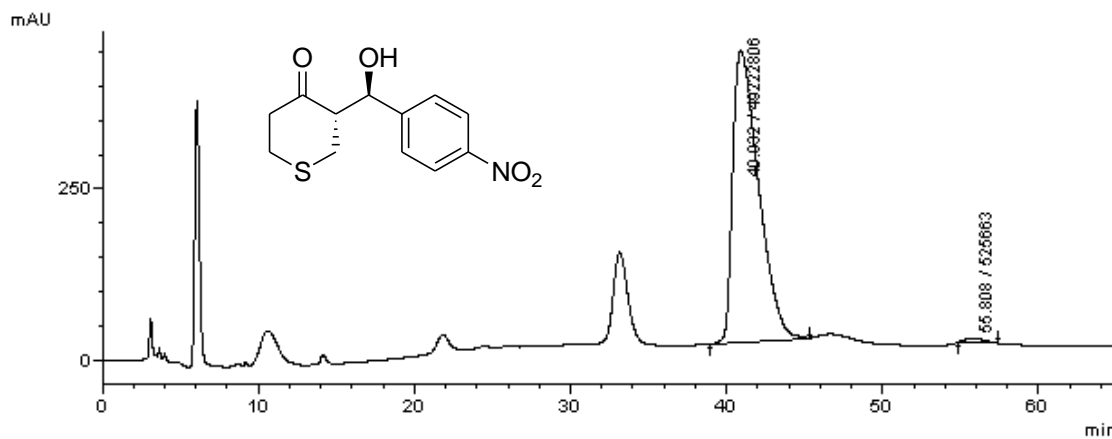

PDA Ch1 210nm 4nm

| Peak # | Ret. Time | Area     | Height | Area %  | Height % | Width at 10% Height |
|--------|-----------|----------|--------|---------|----------|---------------------|
| 1      | 40.932    | 49222806 | 427087 | 98.943  | 98.647   | 3.300               |
| 2      | 55.808    | 525663   | 5857   | 1.057   | 1.353    | 2.337               |
| Total  |           | 49748468 | 432944 | 100.000 | 100.000  |                     |

Crude <sup>1</sup>H NMR of (S)-tetrahydro-3-((R)-hydroxy(4-nitrophenyl)methyl)thiopyran-4-one for dr assessment

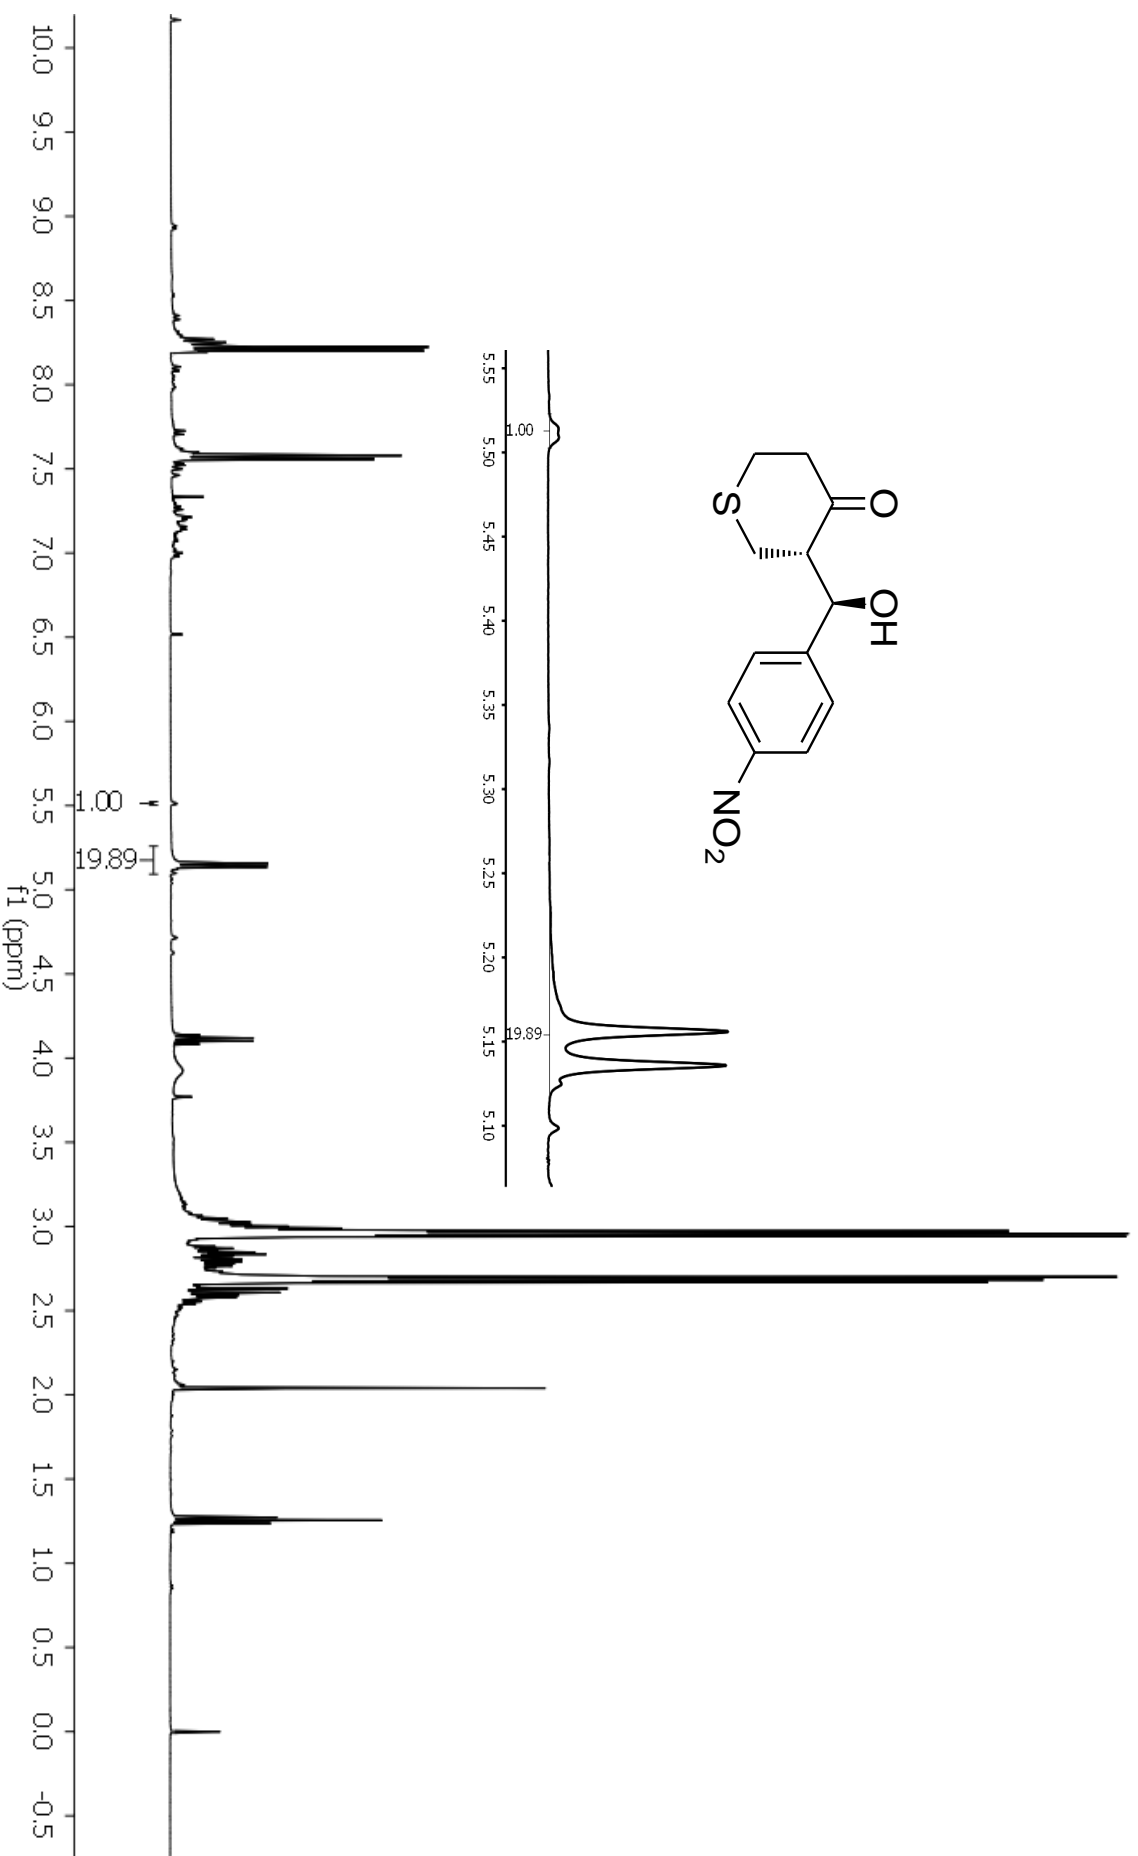

<sup>1</sup>H NMR of (S)-tetrahydro-3-((R)-hydroxy(4-nitrophenyl)methyl)thiopyran-4-one after column chromatography

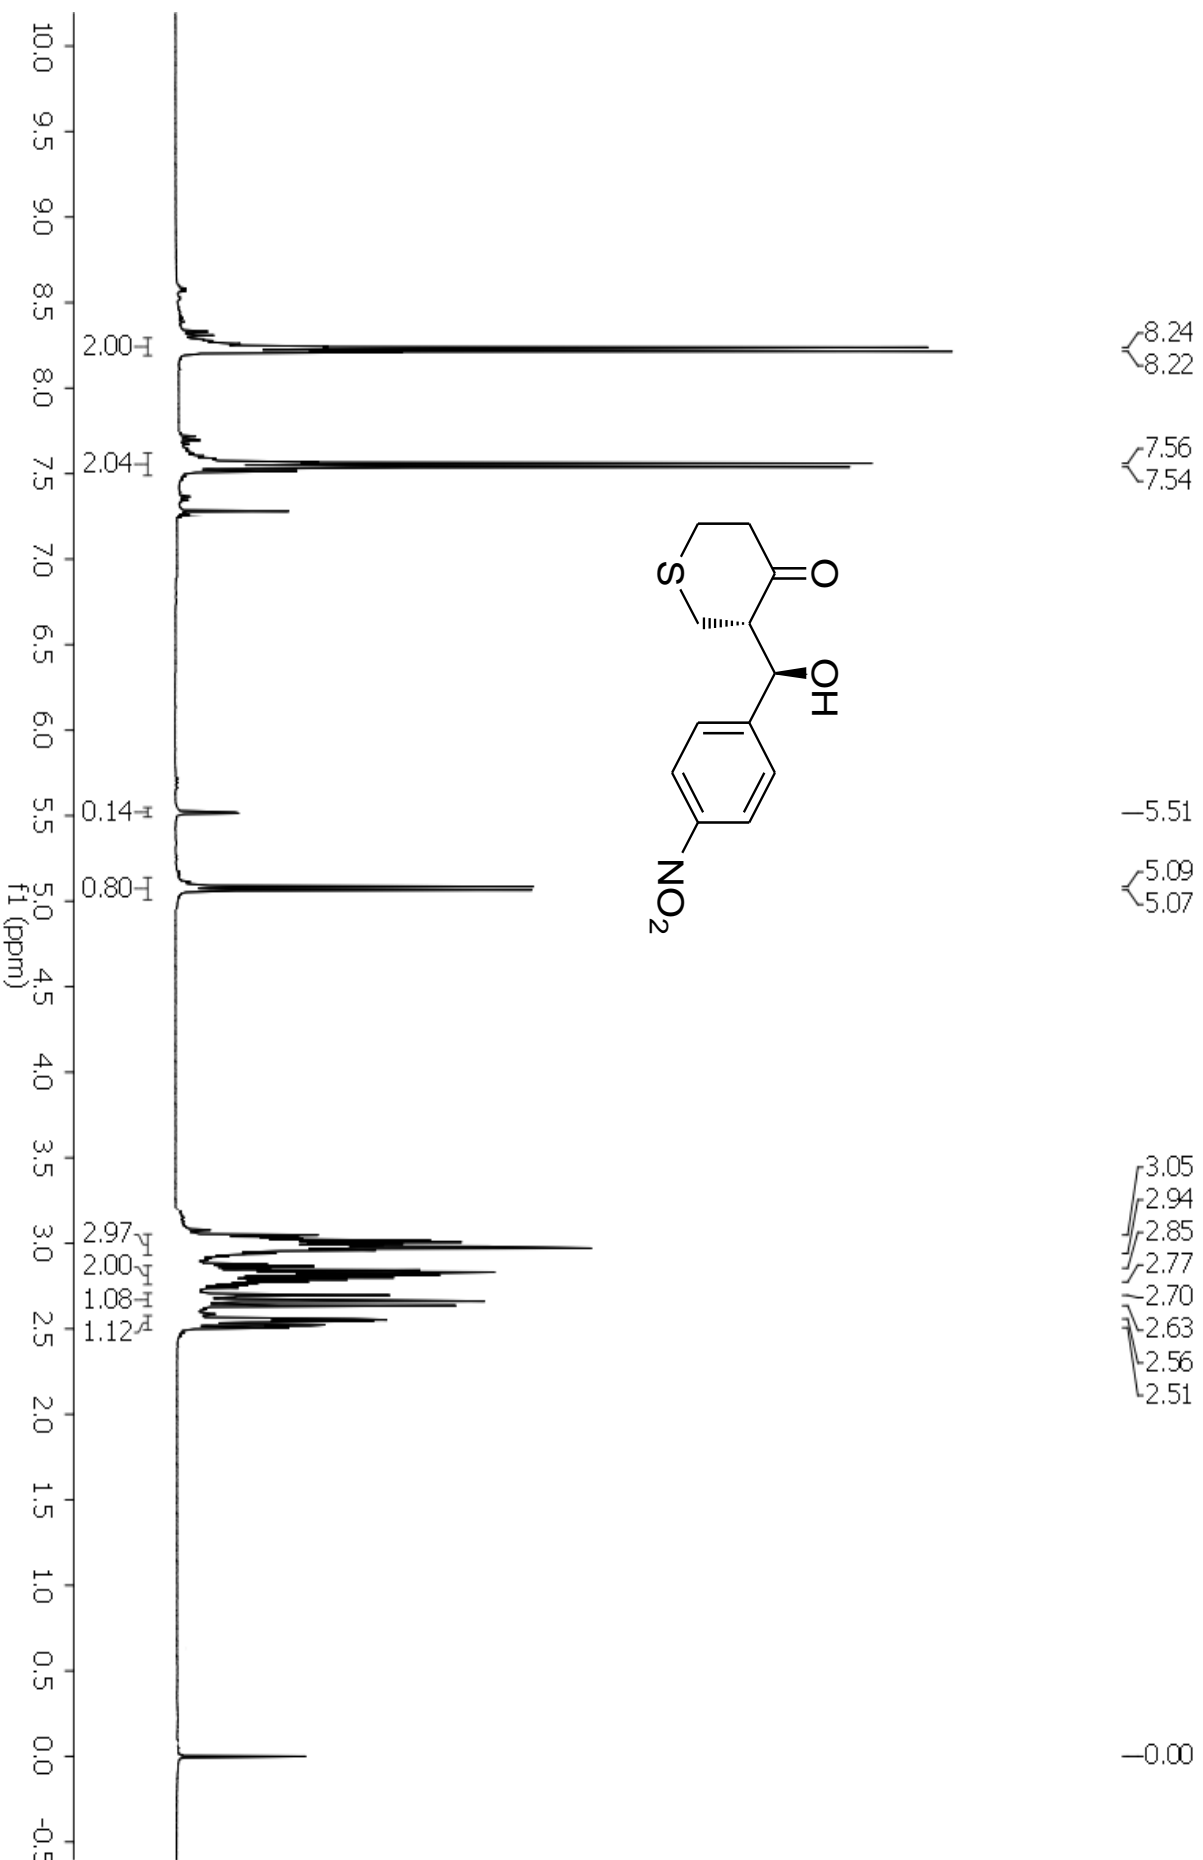

### HPLC of racemic 3-((4-chlorophenyl)(hydroxy)methyl)-tetrahydrothiopyran-4-one (**8b**)

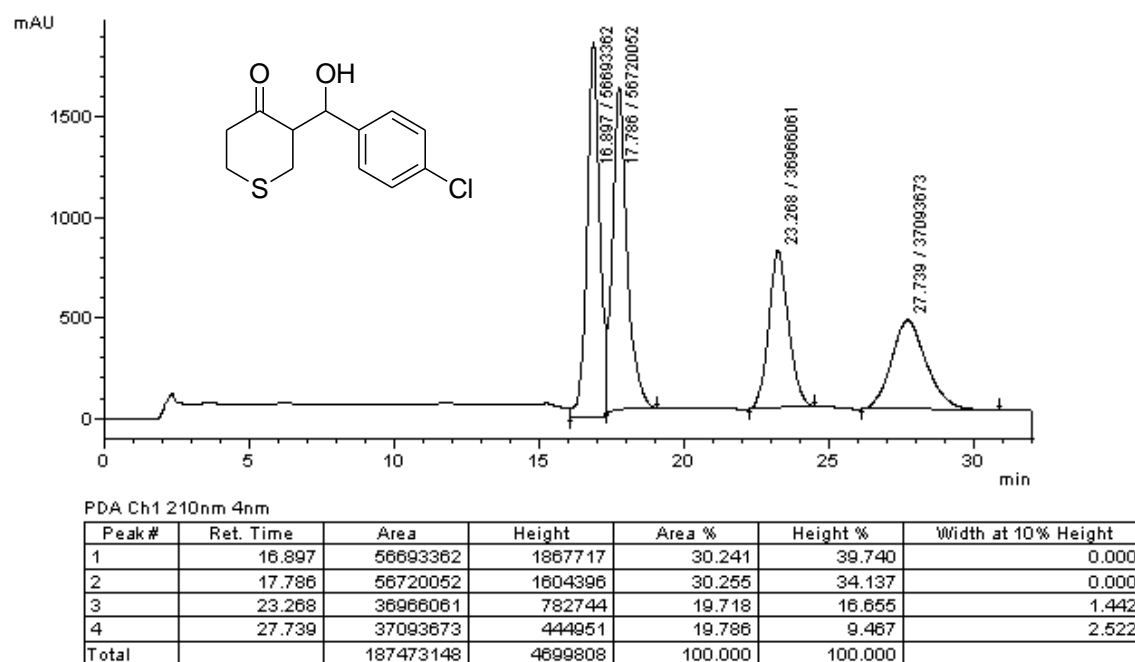

### HPLC of (S)-3-((R)-(4-chlorophenyl)(hydroxy)methyl)-tetrahydrothiopyran-4-one (**8b**)

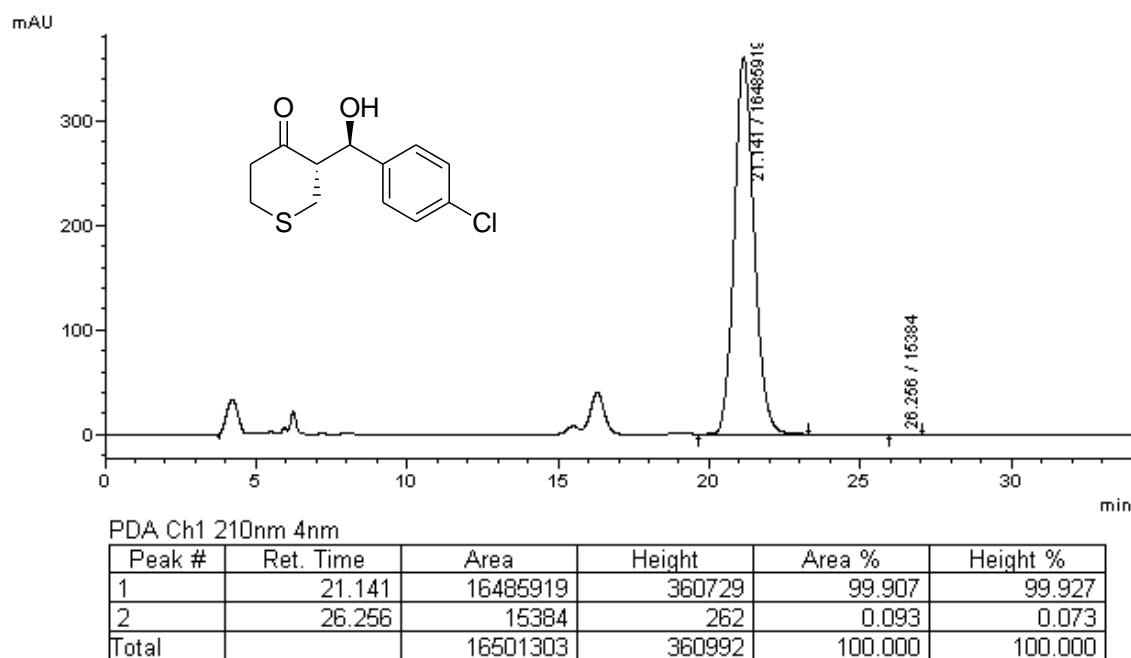



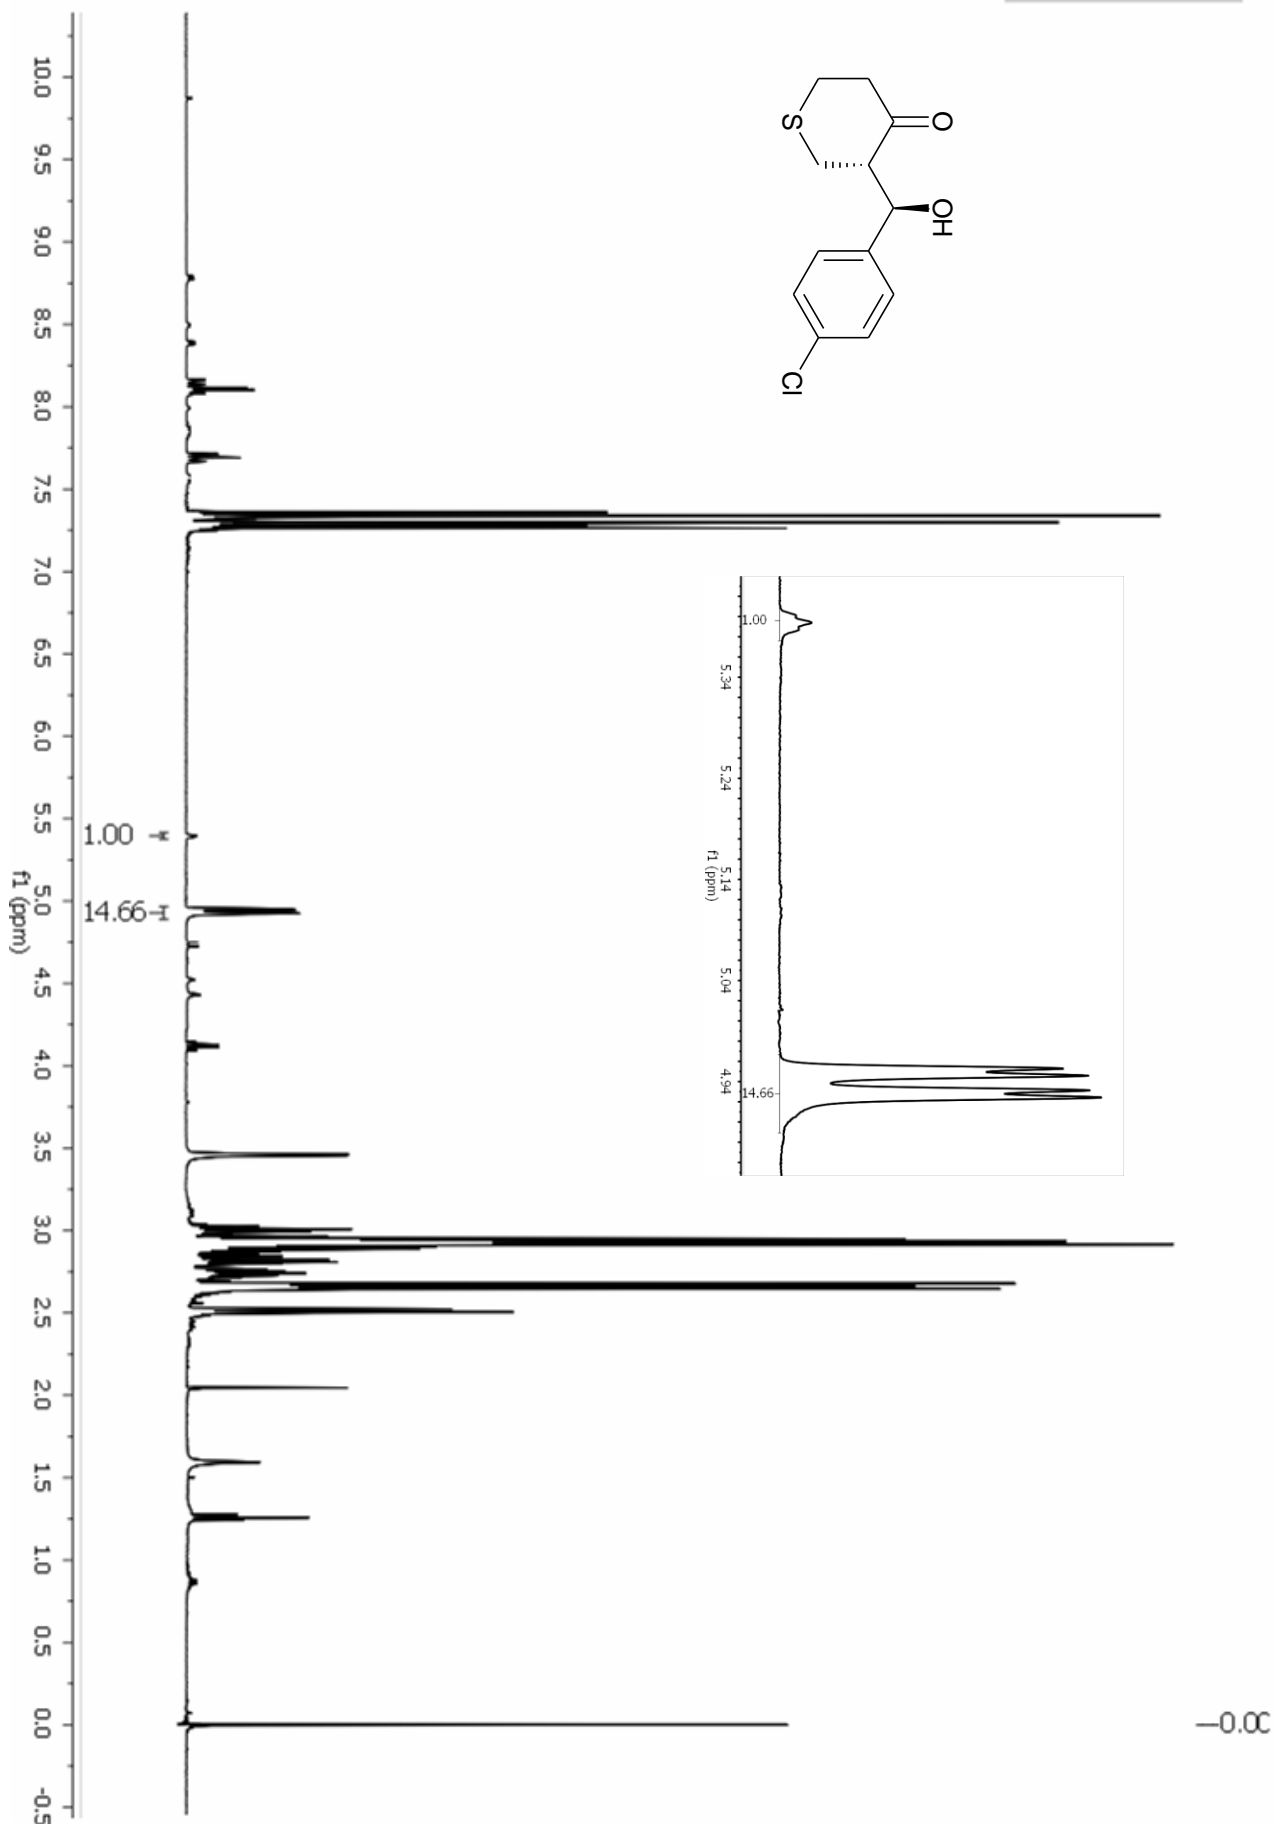

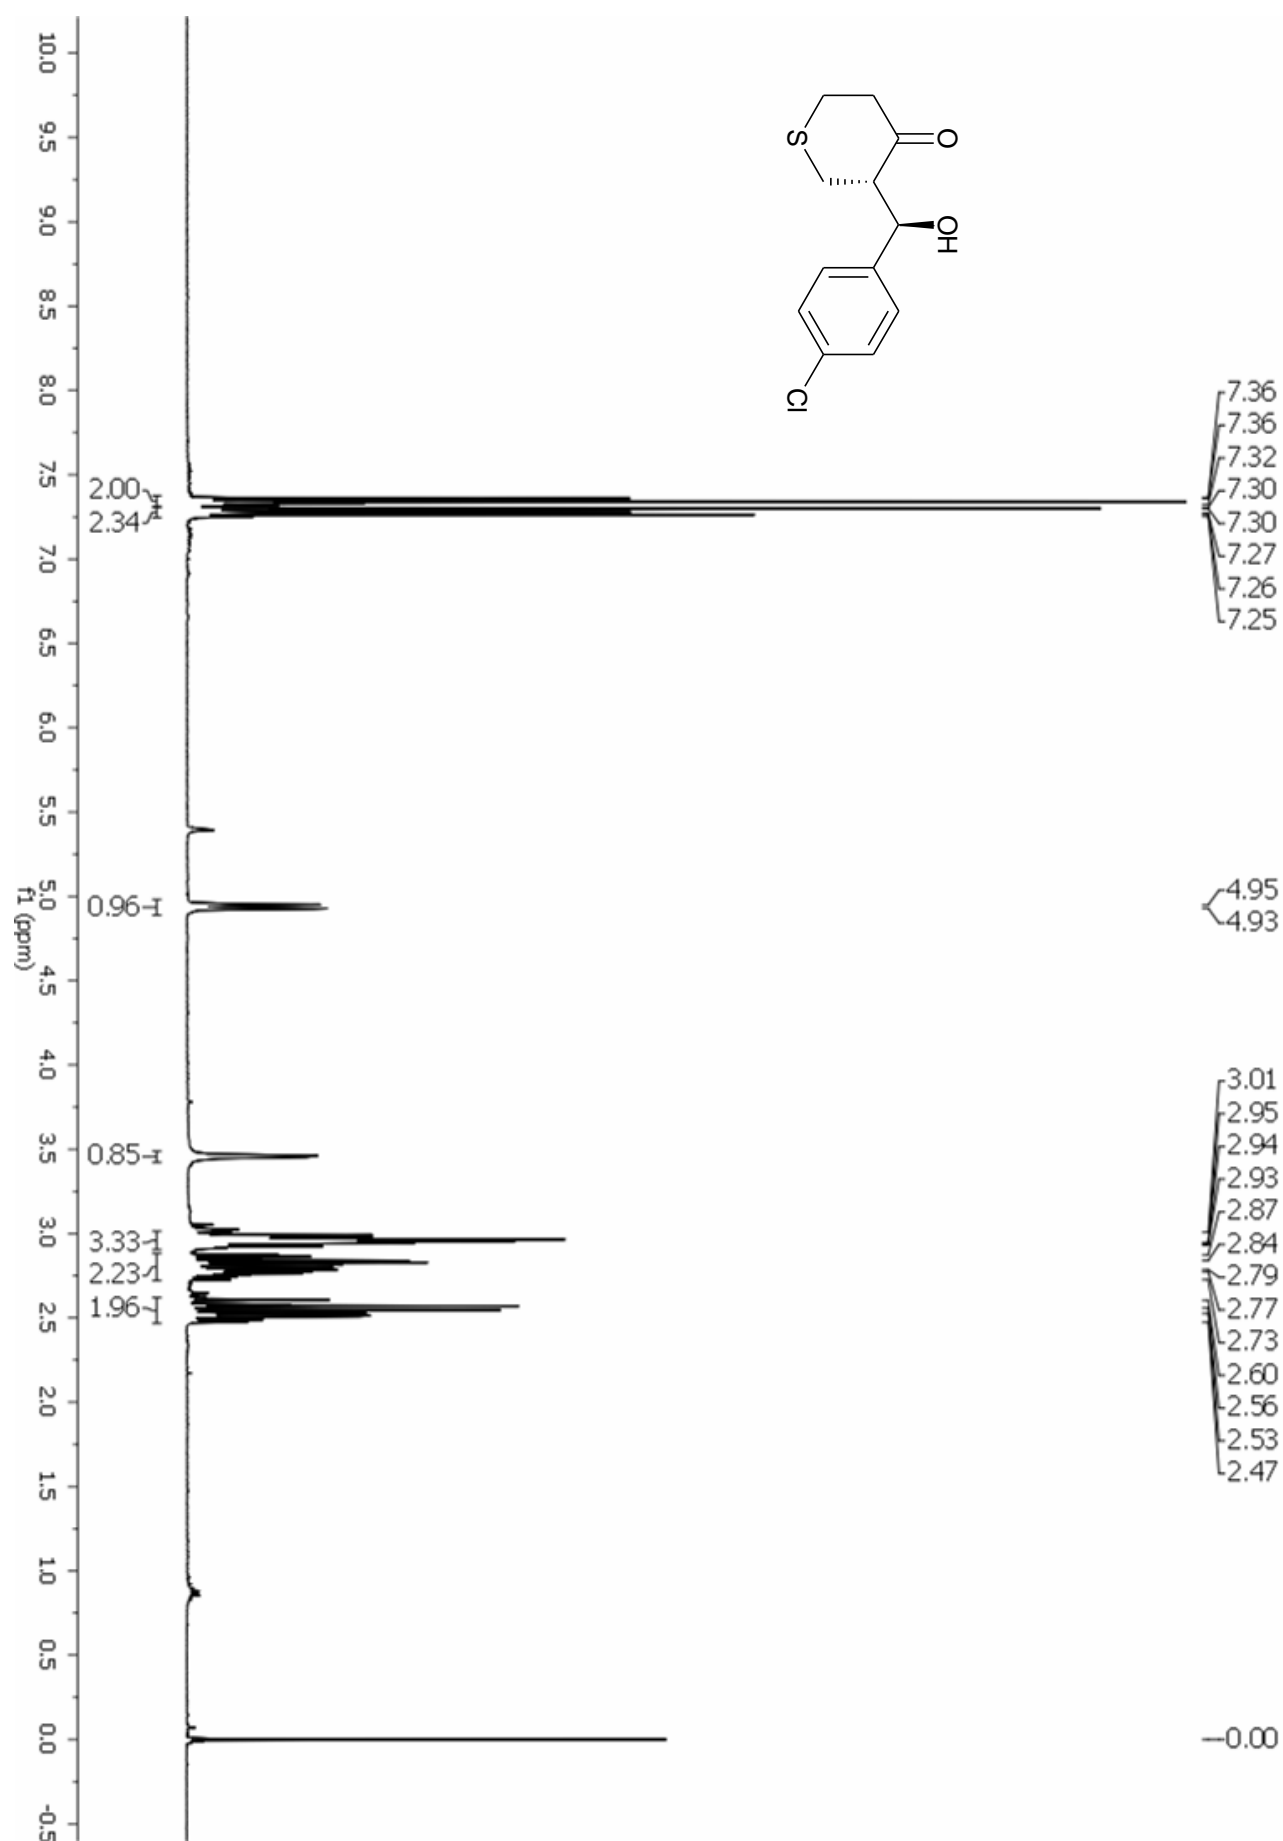

### HPLC of racemic (S)-tetrahydro-3-((R)-hydroxy(phenyl)methyl)thiopyran-4-one (**8c**)

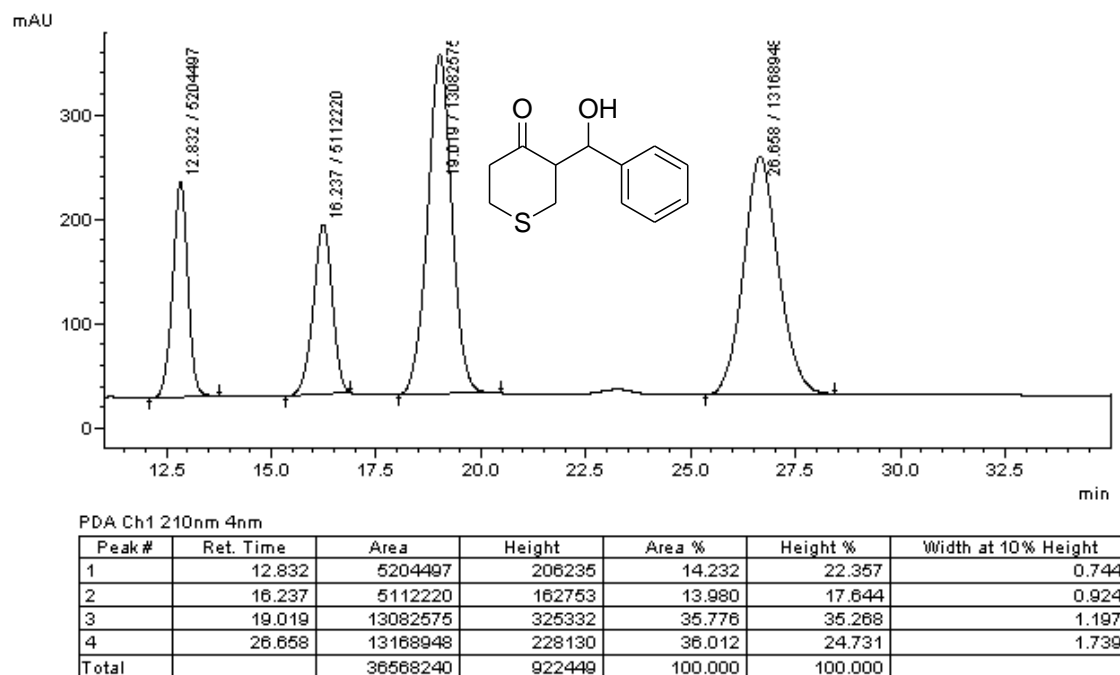

### HPLC of (S)-tetrahydro-3-((R)-hydroxy(phenyl)methyl)thiopyran-4-one (**8c**)

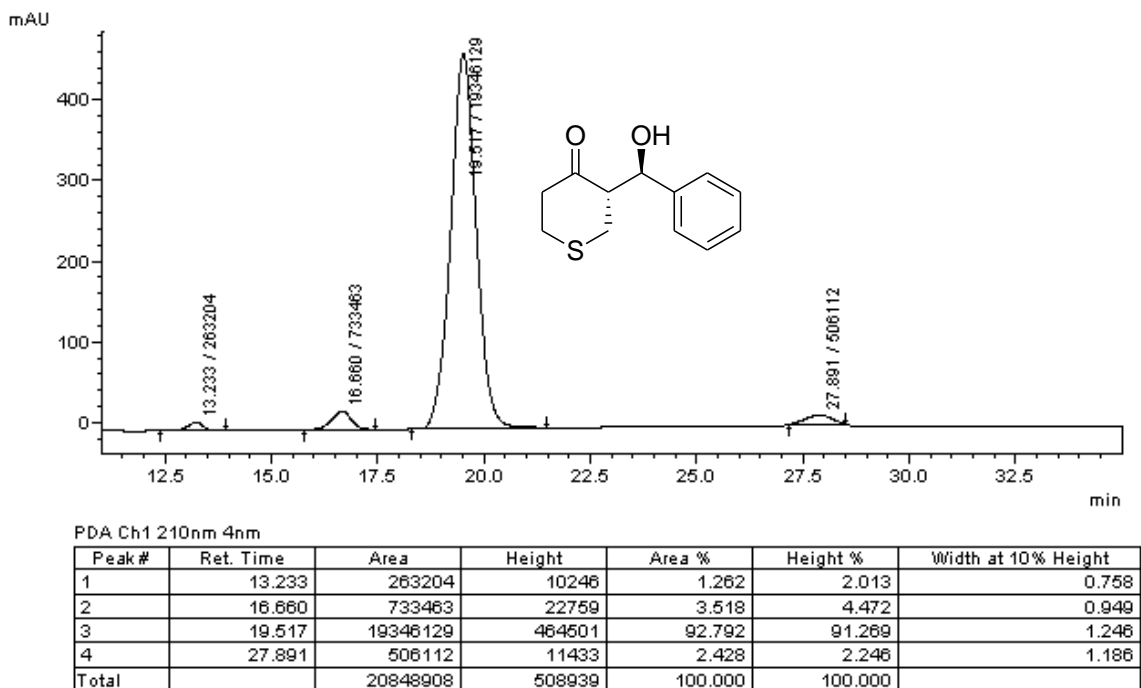

Crude <sup>1</sup>H NMR of (S)-tetrahydro-3-((R)-hydroxy(phenyl)methyl)thiopyran-4-one for dr assessment

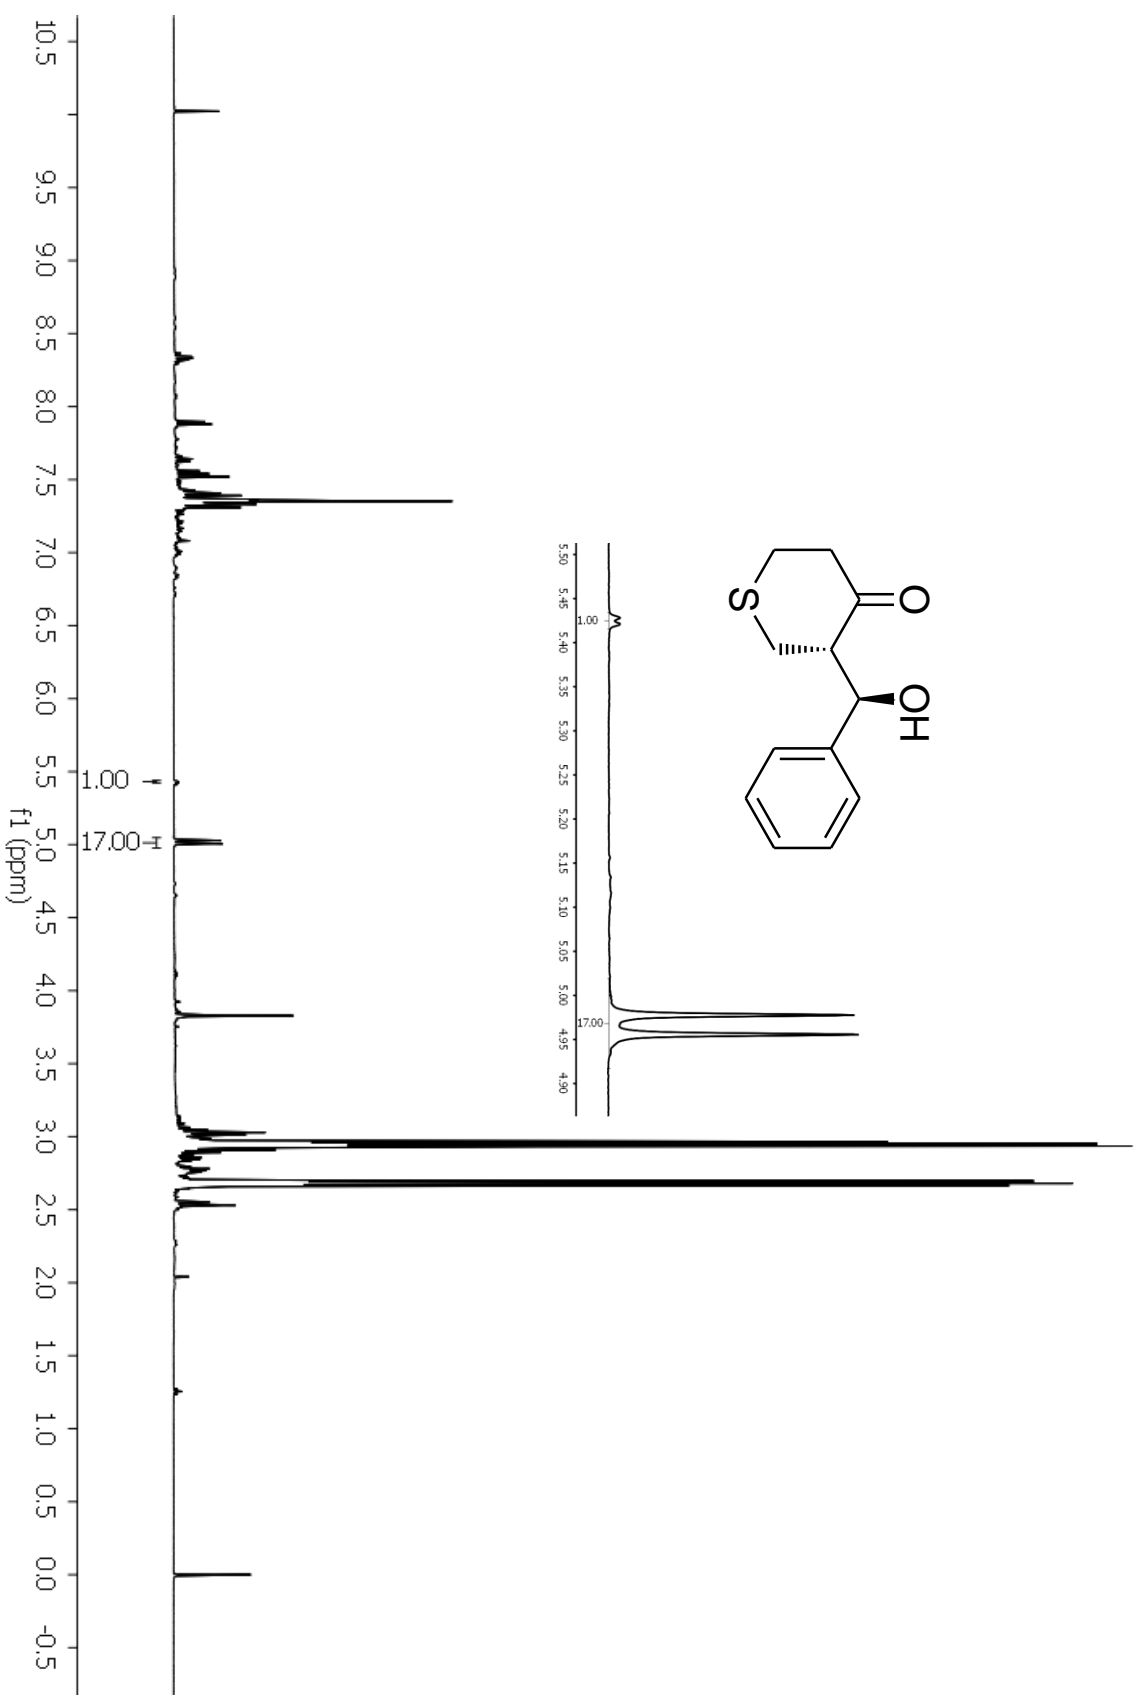

<sup>1</sup>H NMR of (S)-tetrahydro-3-((R)-hydroxy(phenyl) methyl)thiopyran-4-one after column chromatography

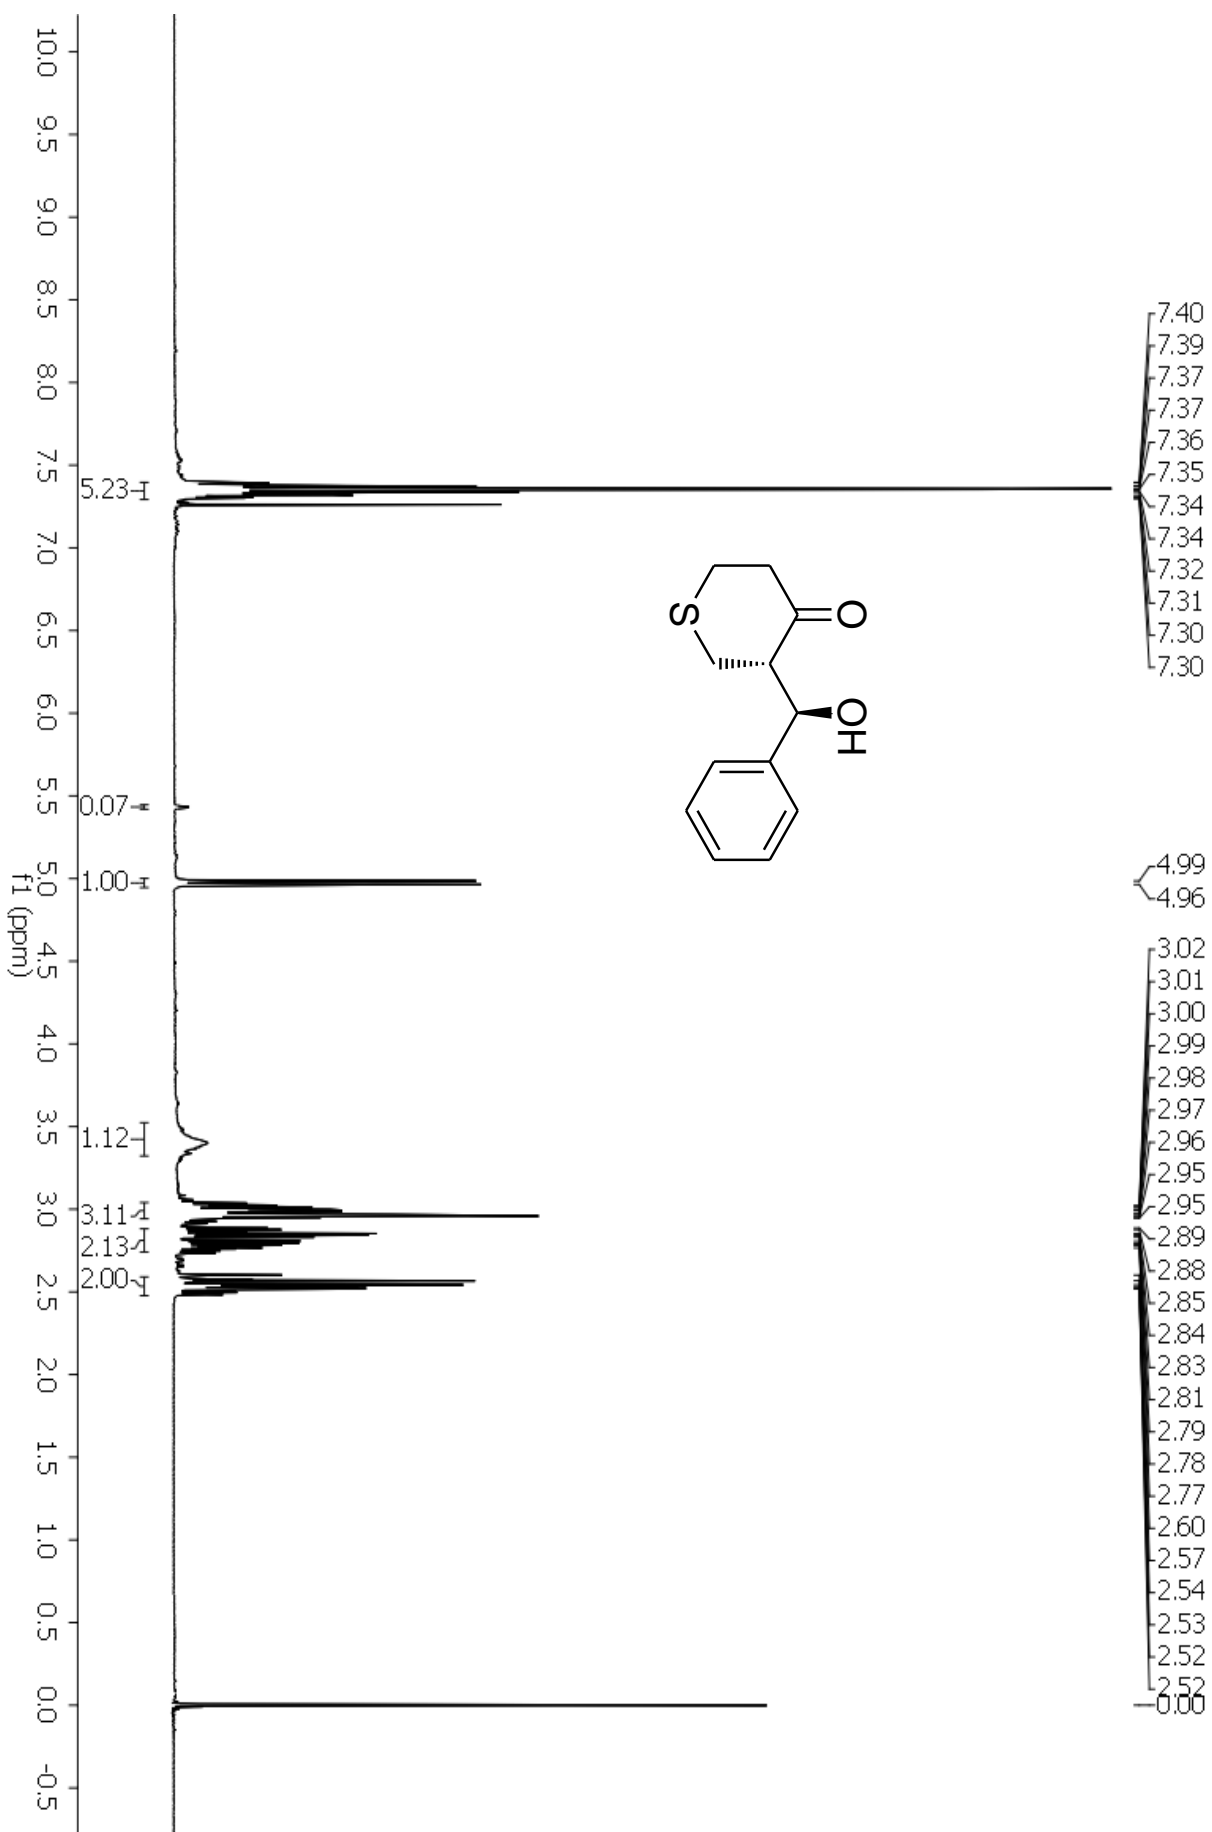

### HPLC of racemic 2-(hydroxy(4-nitrophenyl)methyl)cycloheptanone (**9a**)

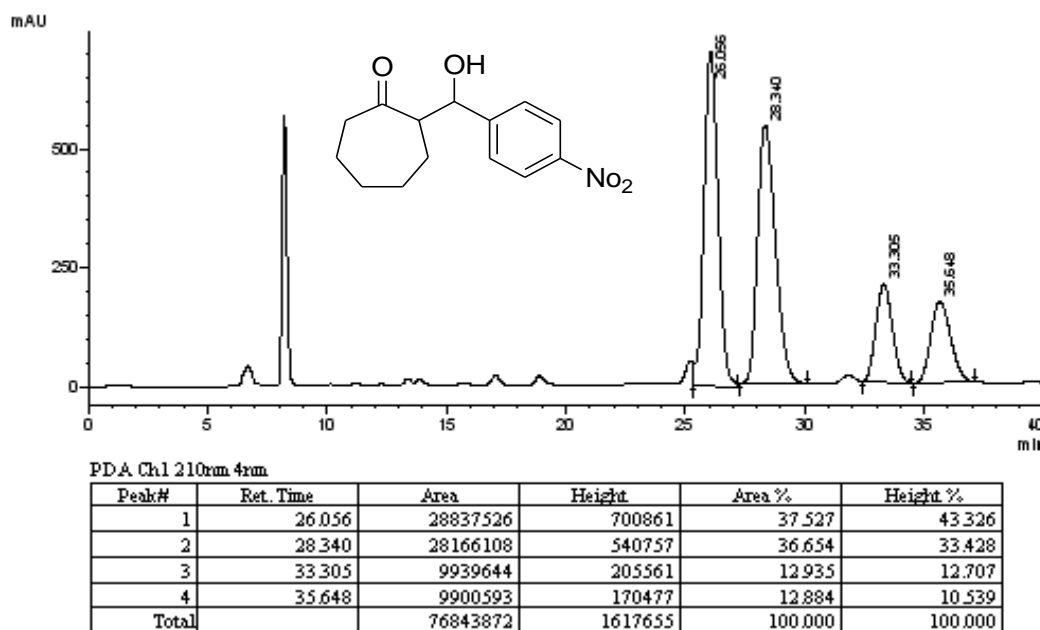

### HPLC of (S)-2-((R)-hydroxy(4-nitrophenyl)methyl)cycloheptanone (**9a**)

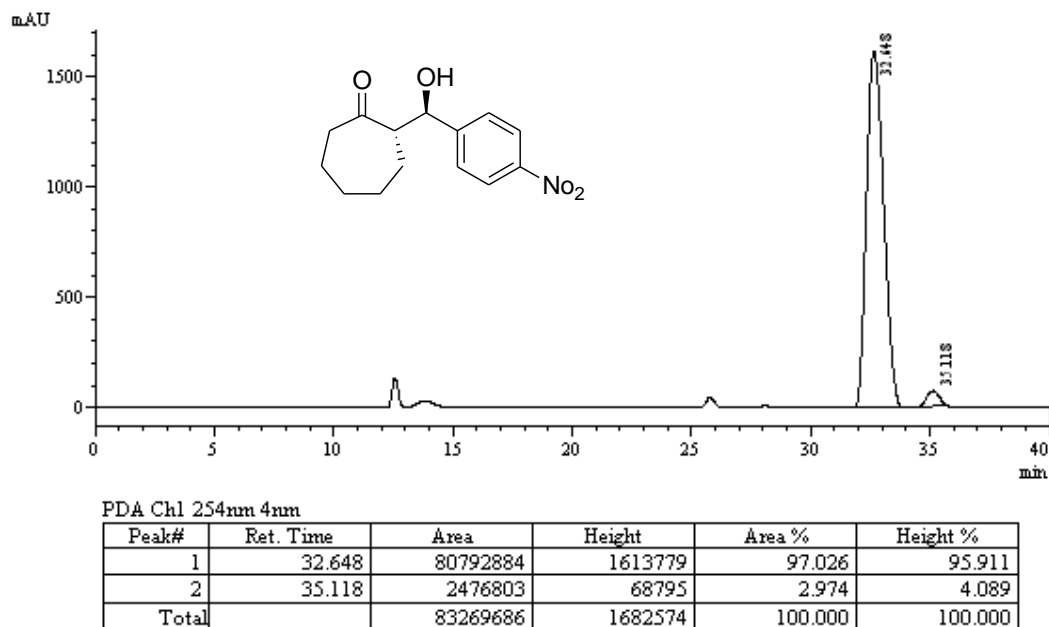

Crude <sup>1</sup>H NMR of (*S*)-2-((*R*)-hydroxy(4-nitrophenyl)methyl)cycloheptanone for dr assessment

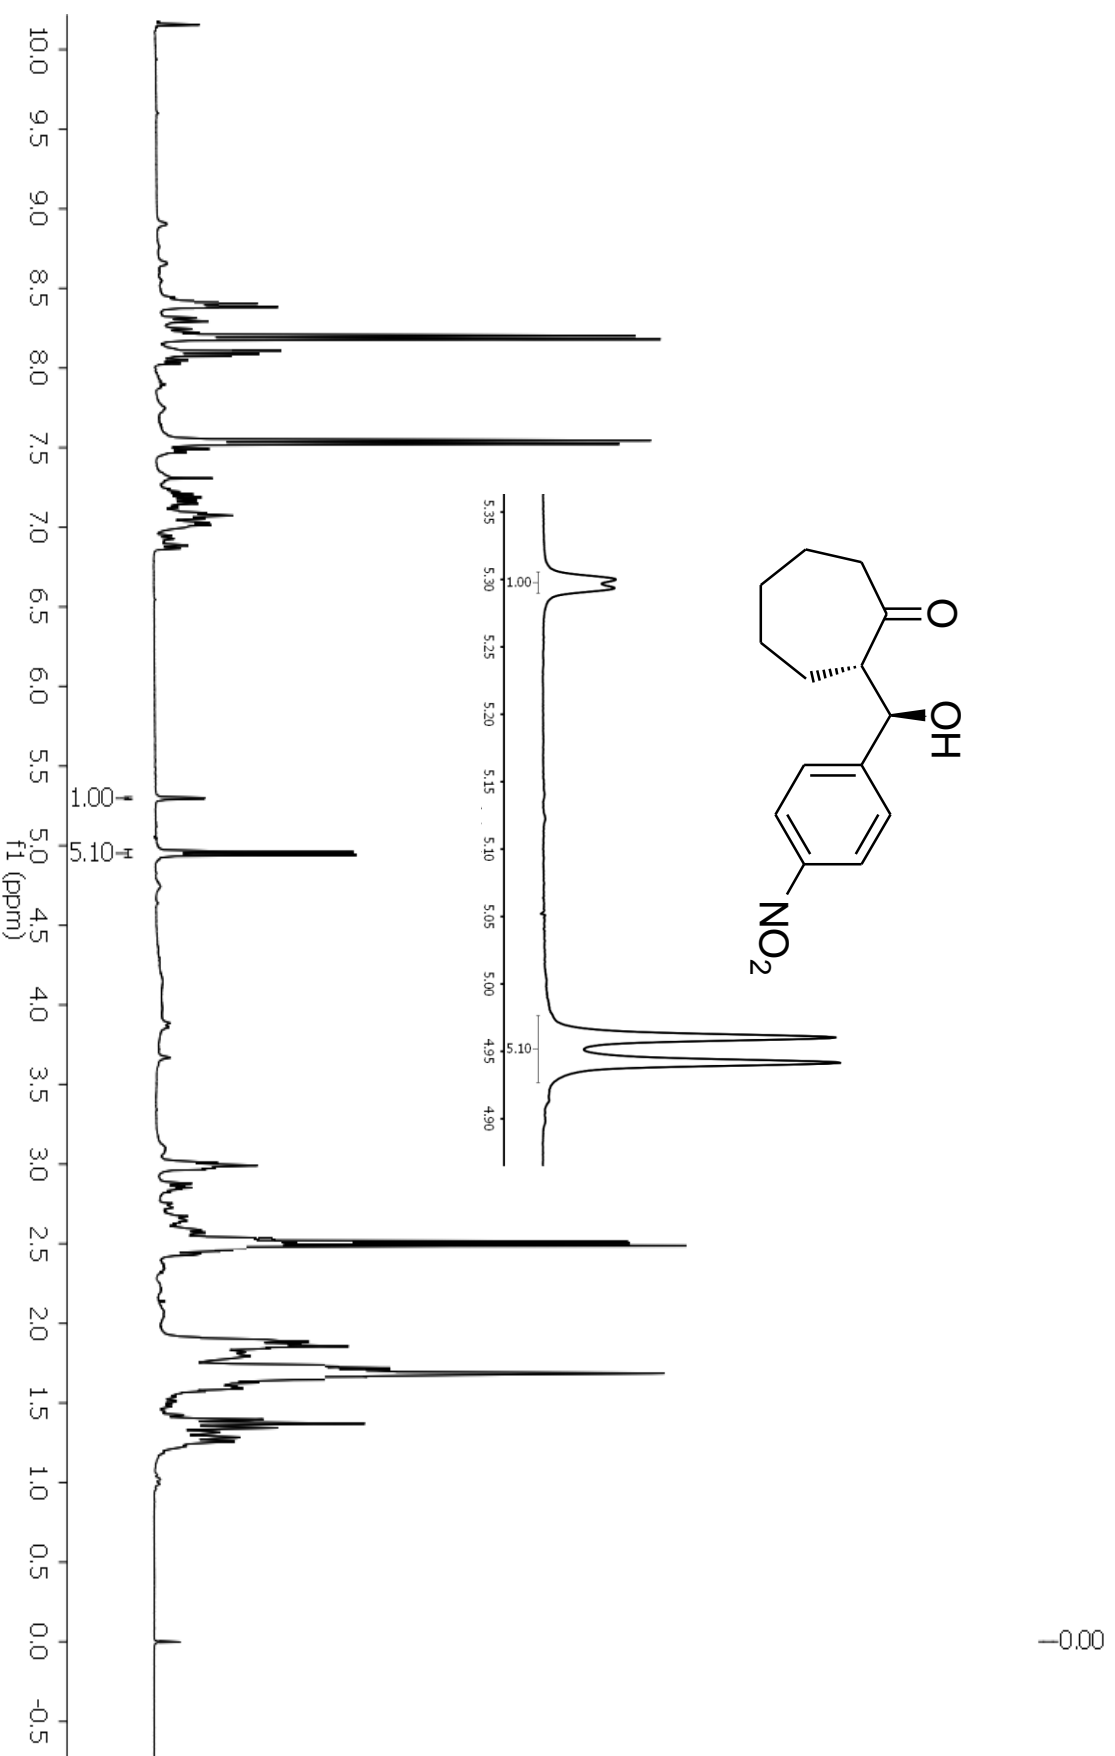

0.00

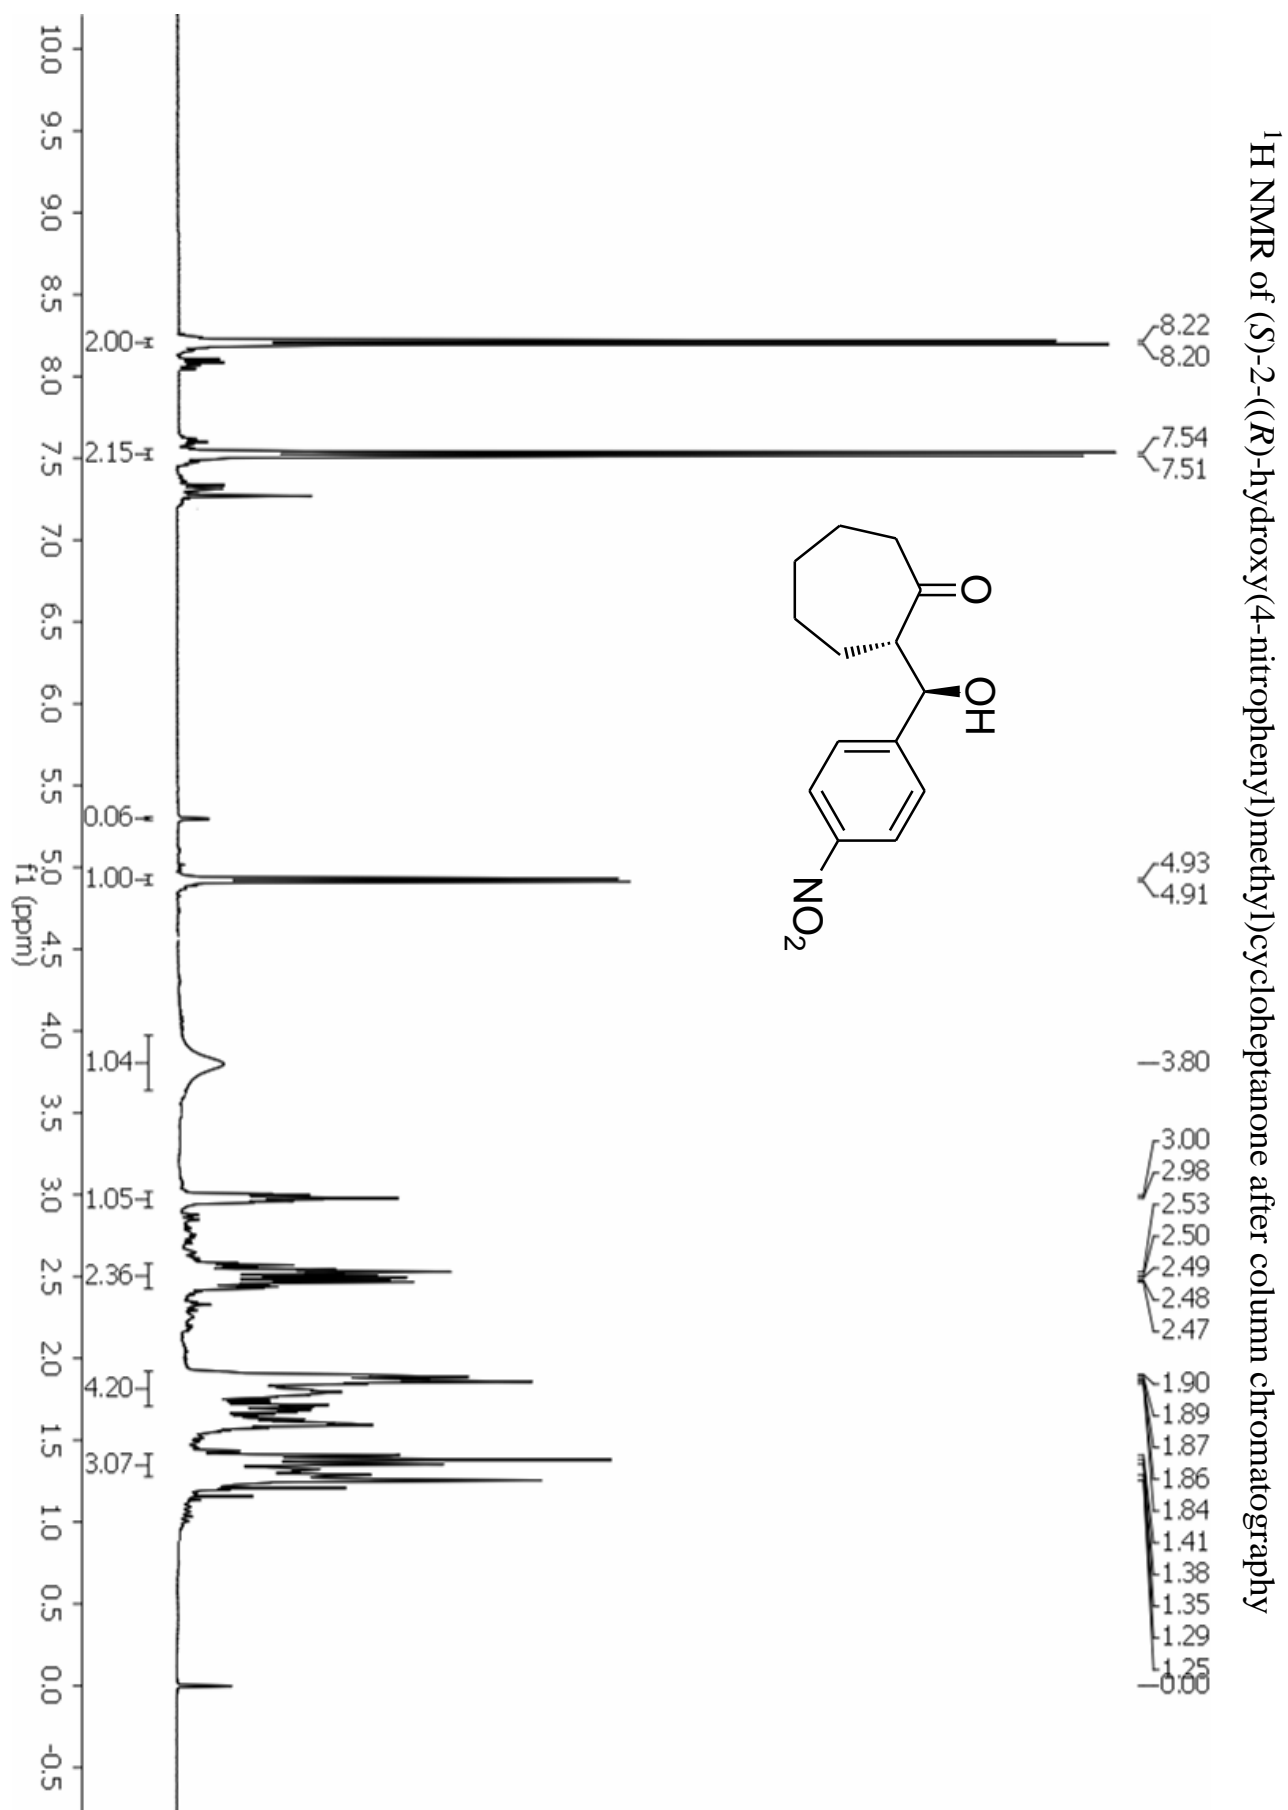



### HPLC of racemic 2-(hydroxy(2-nitrophenyl)methyl)cycloheptanone (**9b**)

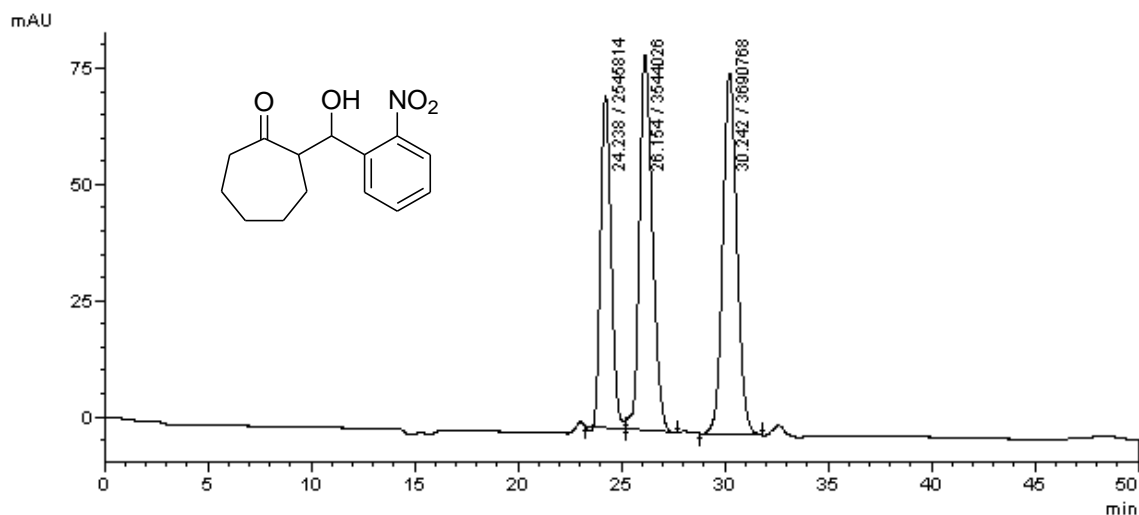

PDA Ch1 254nm 4nm

| Peak # | Ret. Time | Area    | Height | Area %  | Height % |
|--------|-----------|---------|--------|---------|----------|
| 1      | 24.238    | 2545814 | 71502  | 26.029  | 31.110   |
| 2      | 26.154    | 3544026 | 80681  | 36.235  | 35.105   |
| 3      | 30.242    | 3690768 | 77649  | 37.736  | 33.785   |
| Total  |           | 9780609 | 229832 | 100.000 | 100.000  |

### HPLC of (S)-2-((R)-hydroxy(2-nitrophenyl)methyl)cycloheptanone (**9b**)

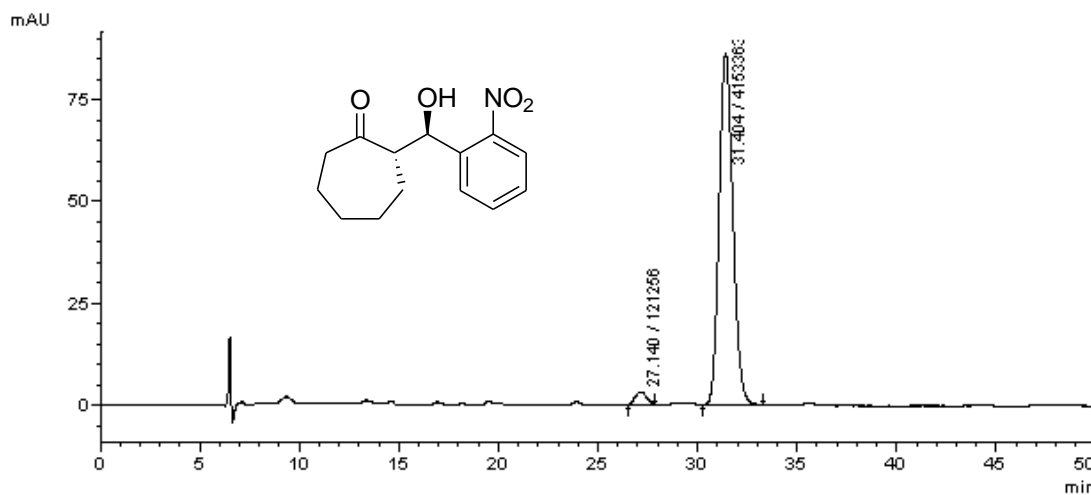

PDA Ch1 254nm 4nm

| Peak # | Ret. Time | Area    | Height | Area %  | Height % | Width at 10% Height |
|--------|-----------|---------|--------|---------|----------|---------------------|
| 1      | 27.140    | 121256  | 3117   | 2.837   | 3.489    | 1.087               |
| 2      | 31.404    | 4153363 | 86235  | 97.163  | 96.511   | 1.383               |
| Total  |           | 4274619 | 89353  | 100.000 | 100.000  |                     |

Crude <sup>1</sup>H NMR of (S)-2-((R)-hydroxy(2-nitrophenyl)methyl)cycloheptanone for dr assessment

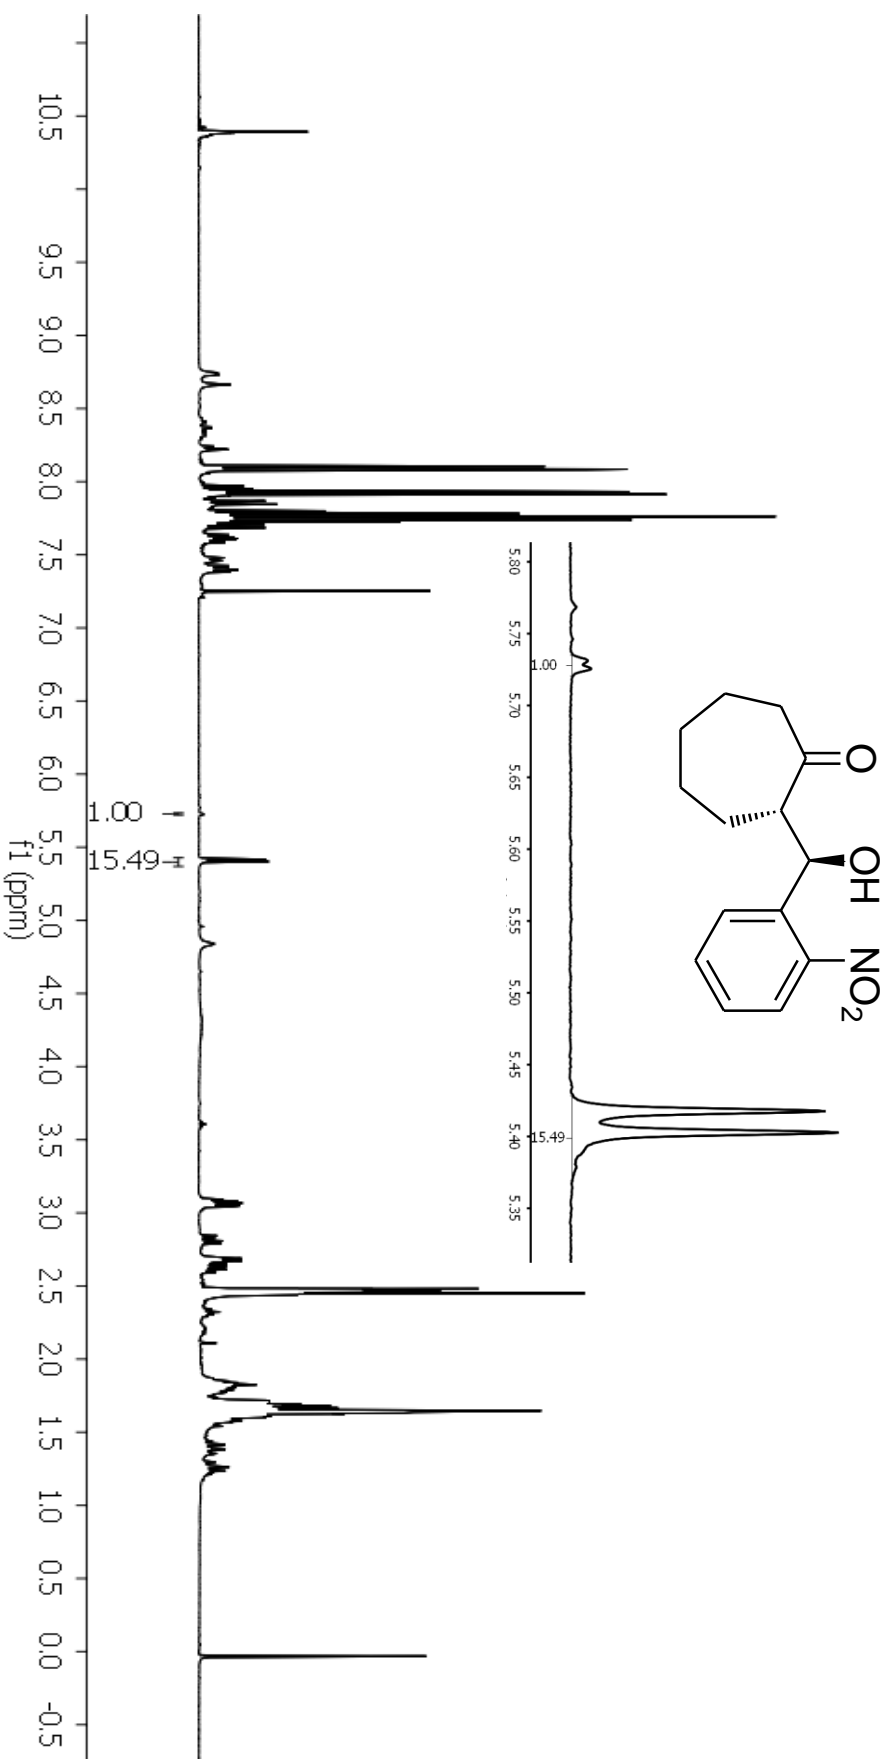

1H NMR of (S)-2-((R)-hydroxy(2-nitrophenyl)methyl)cycloheptanone after column chromatography

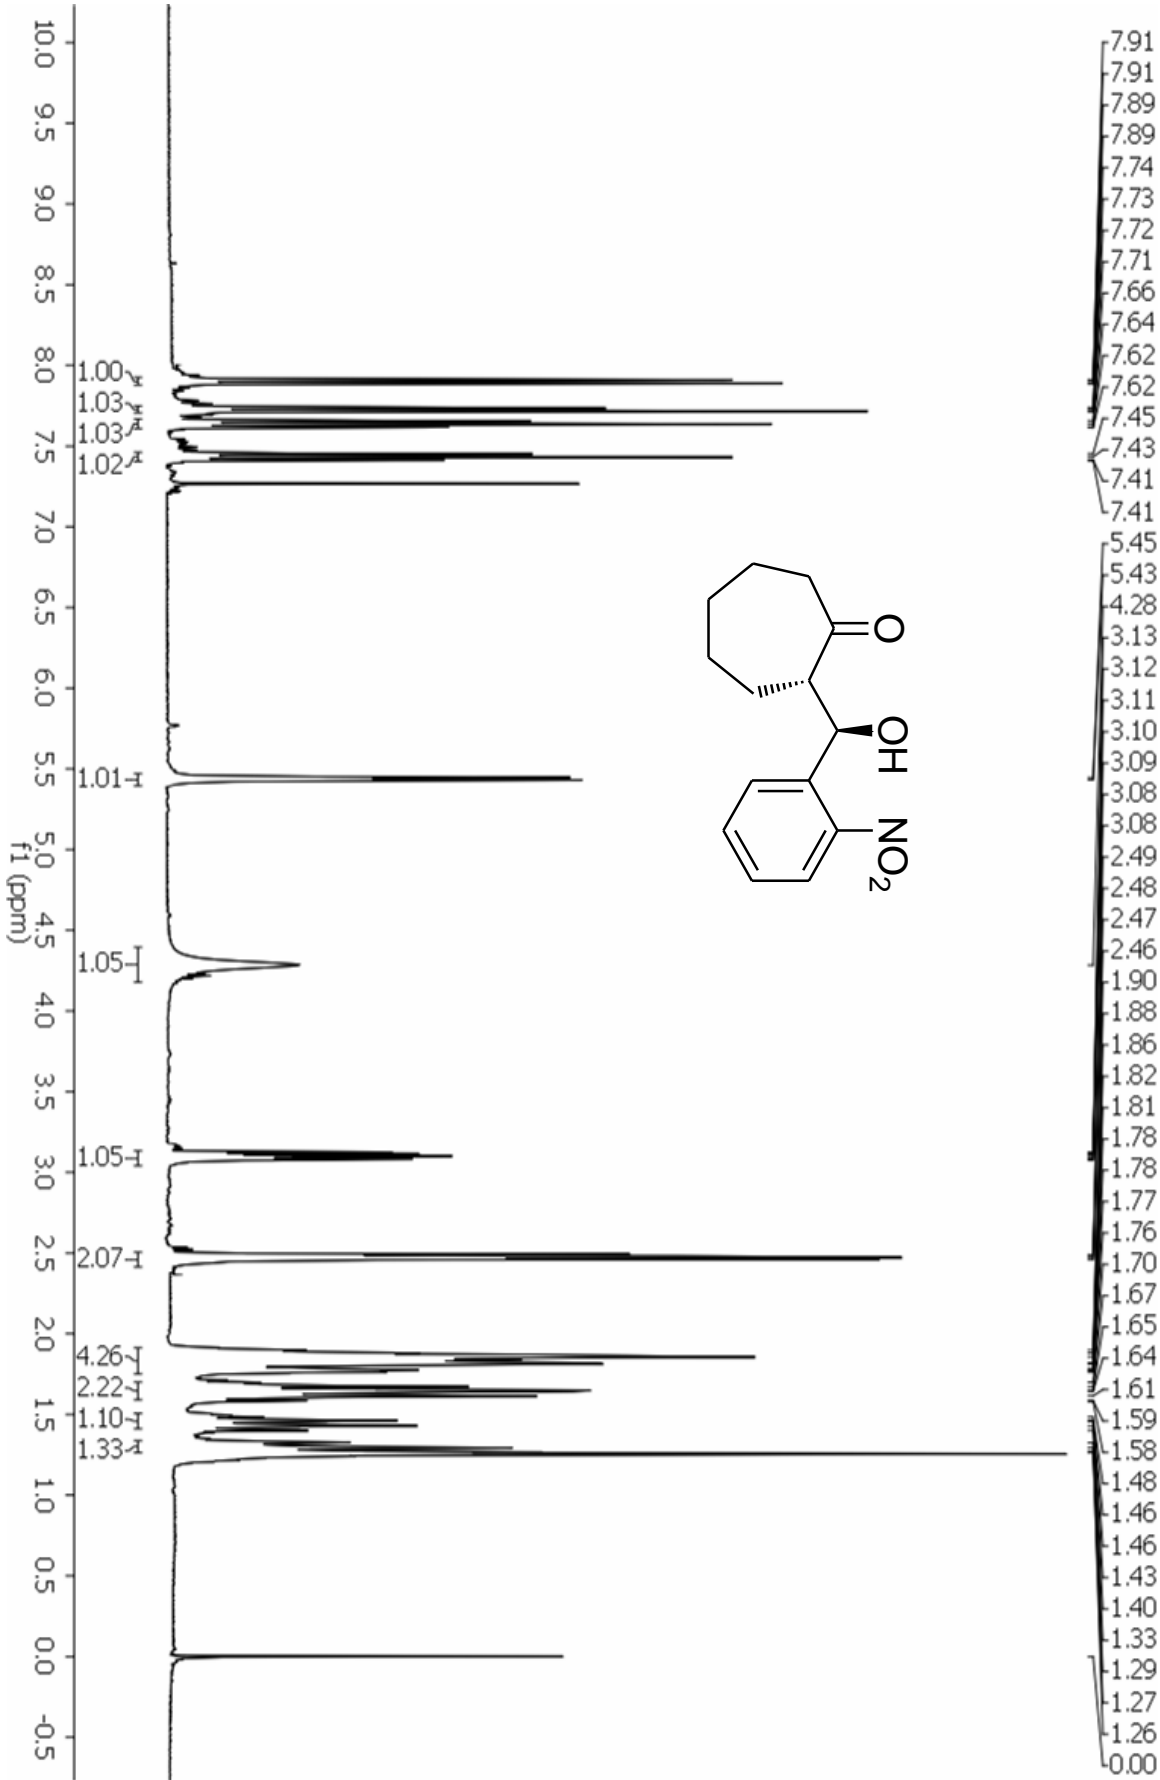

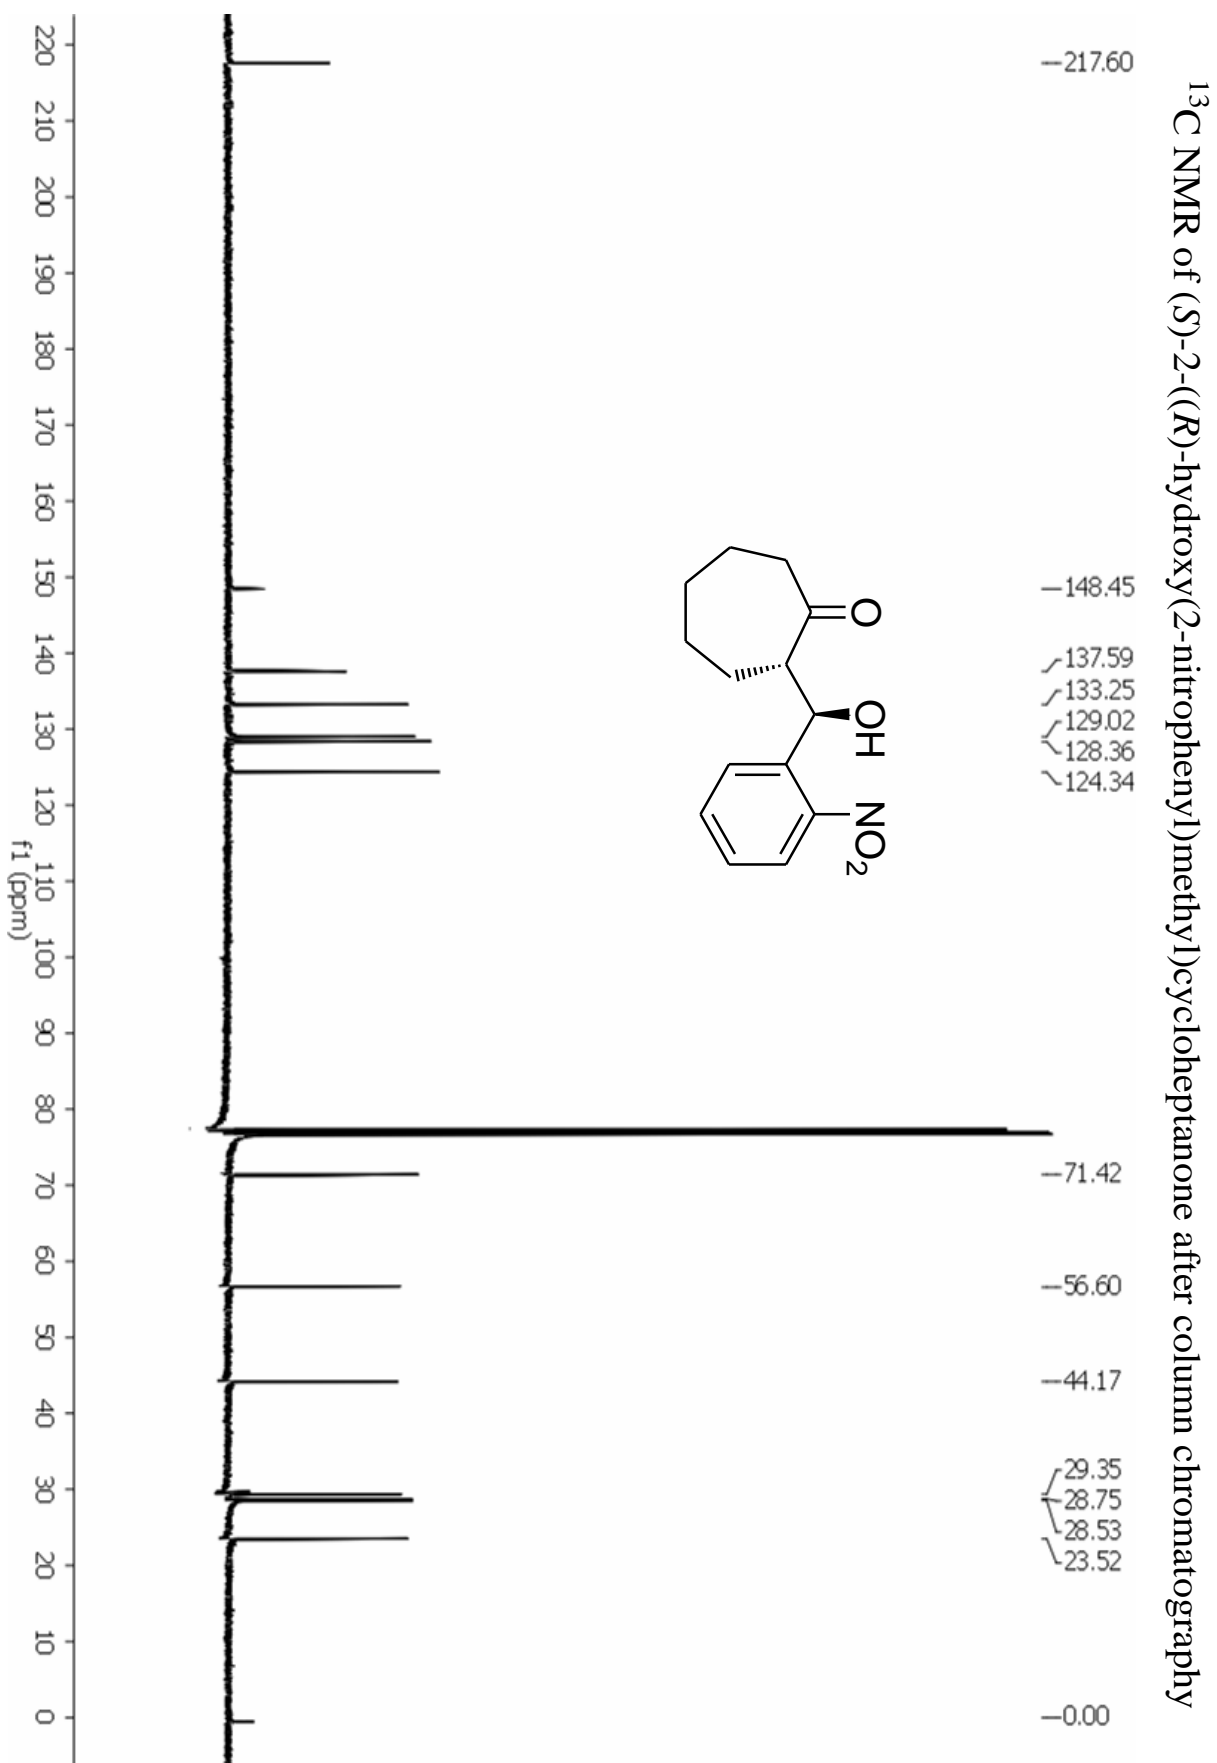

### HPLC of racemic 2-((4-chlorophenyl)(hydroxy)methyl)cycloheptanone (**9c**)

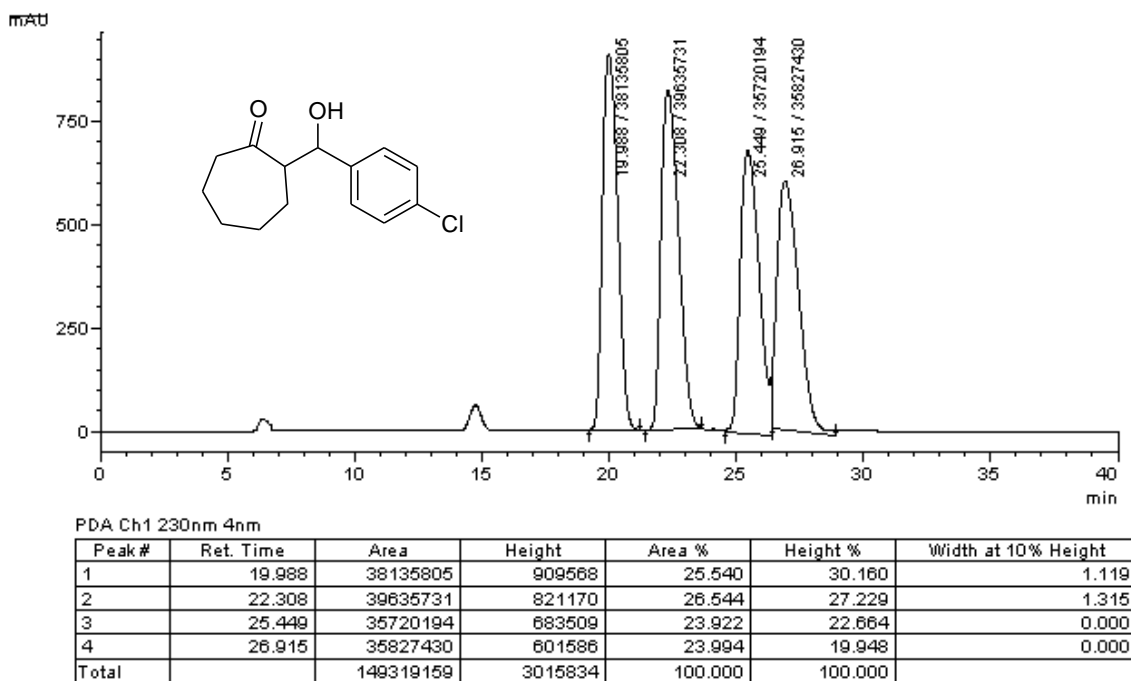

### HPLC of (S)-2-((R)-(4-chlorophenyl)(hydroxy)methyl)cycloheptanone (**9c**)

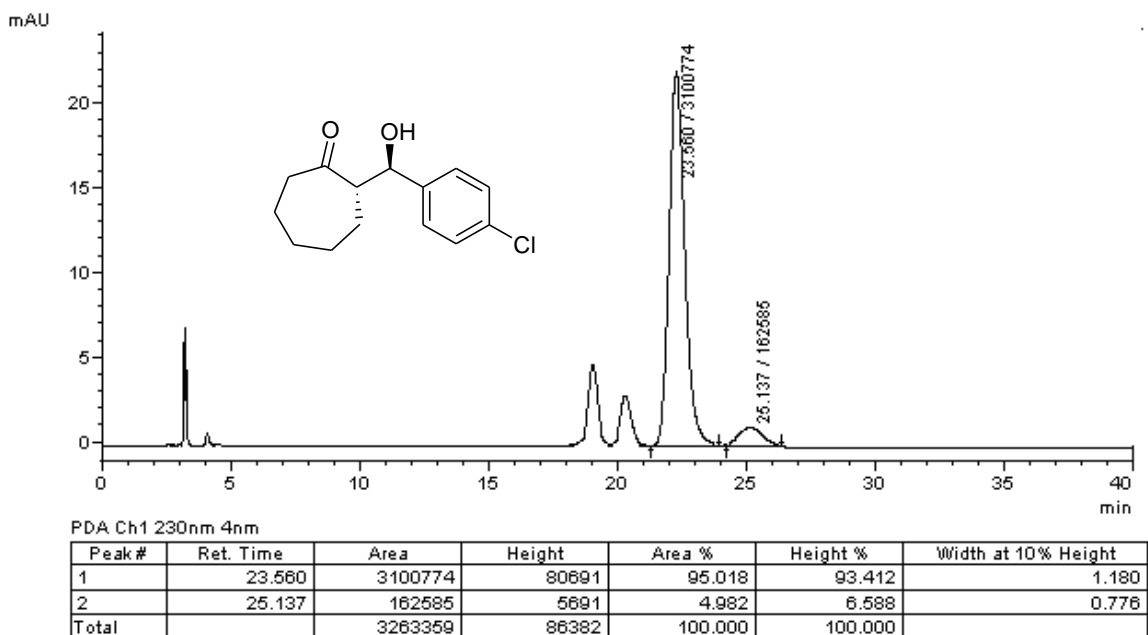

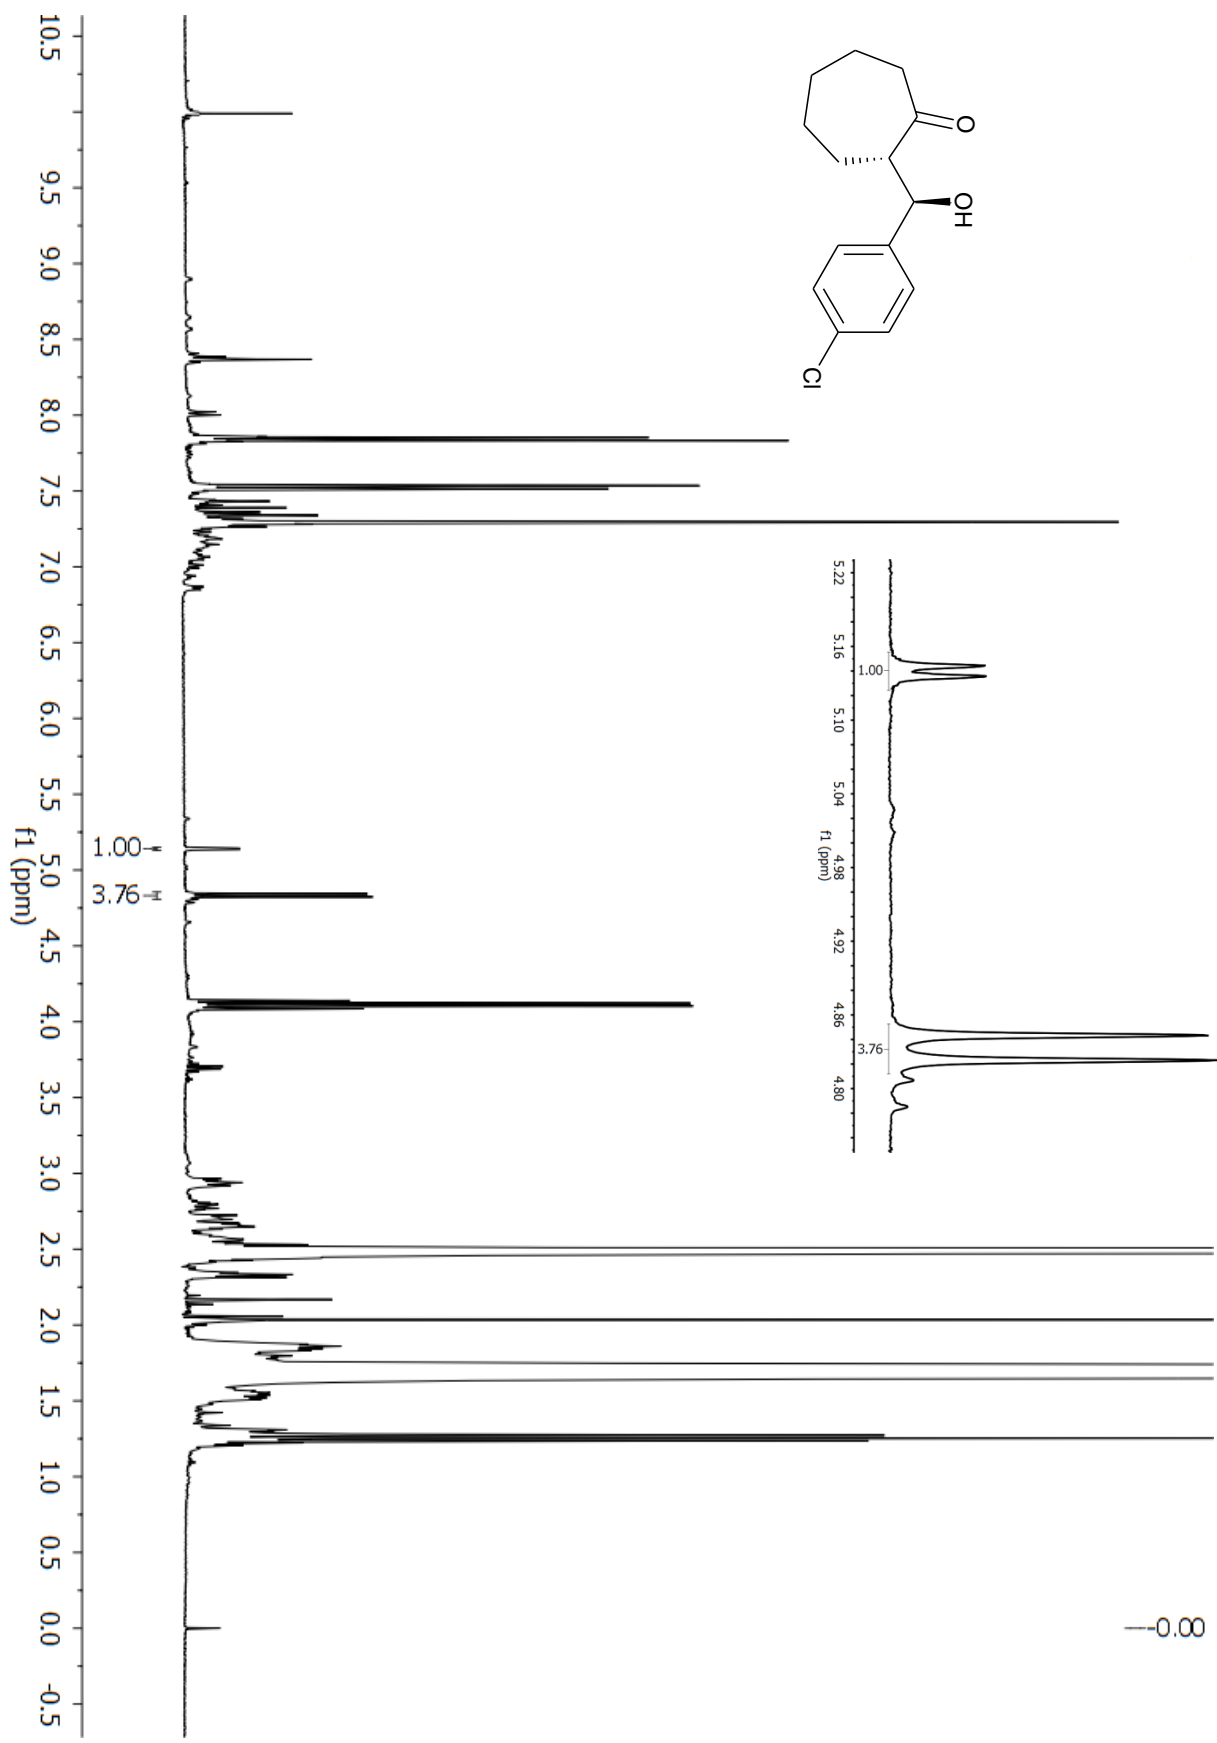

<sup>1</sup>H NMR of (S)-2-((R)-(4-chlorophenyl)(hydroxymethyl)cycloheptanone after column chromatography

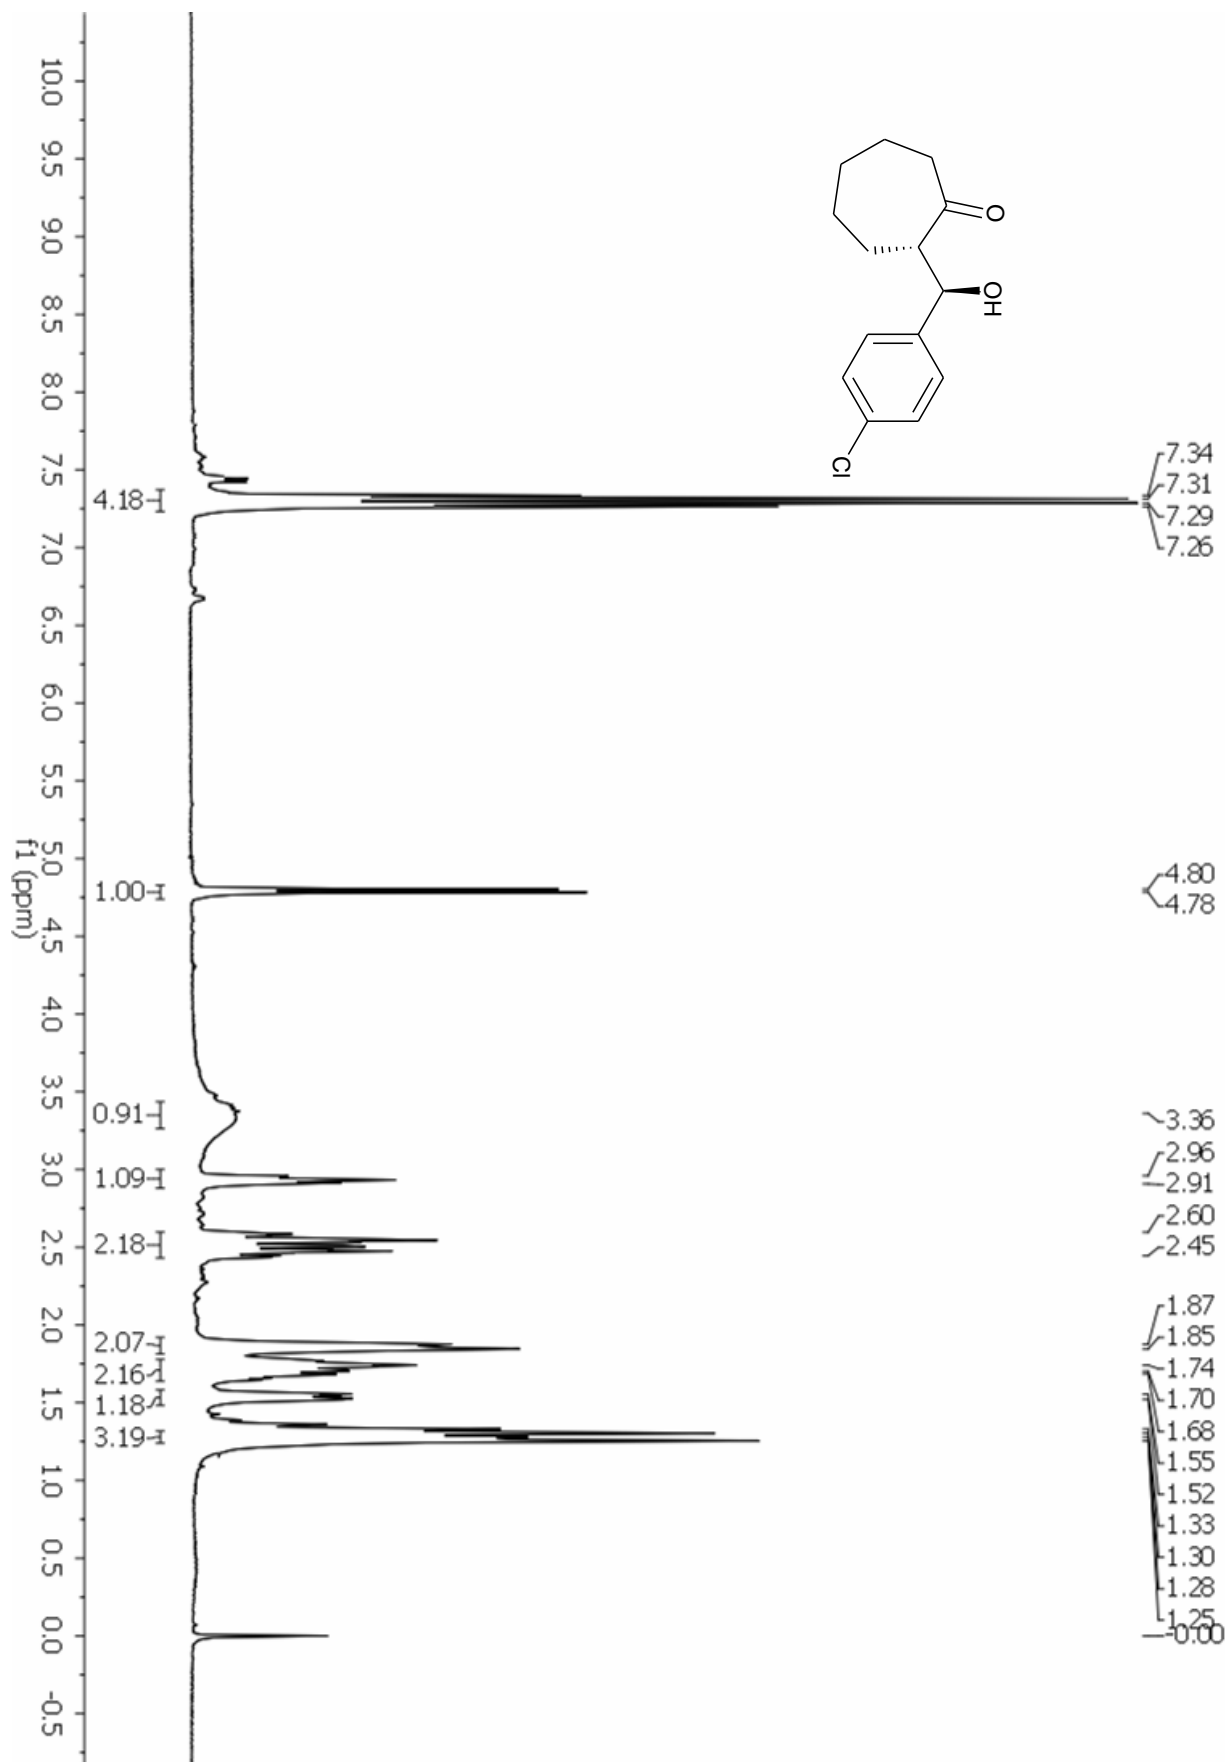

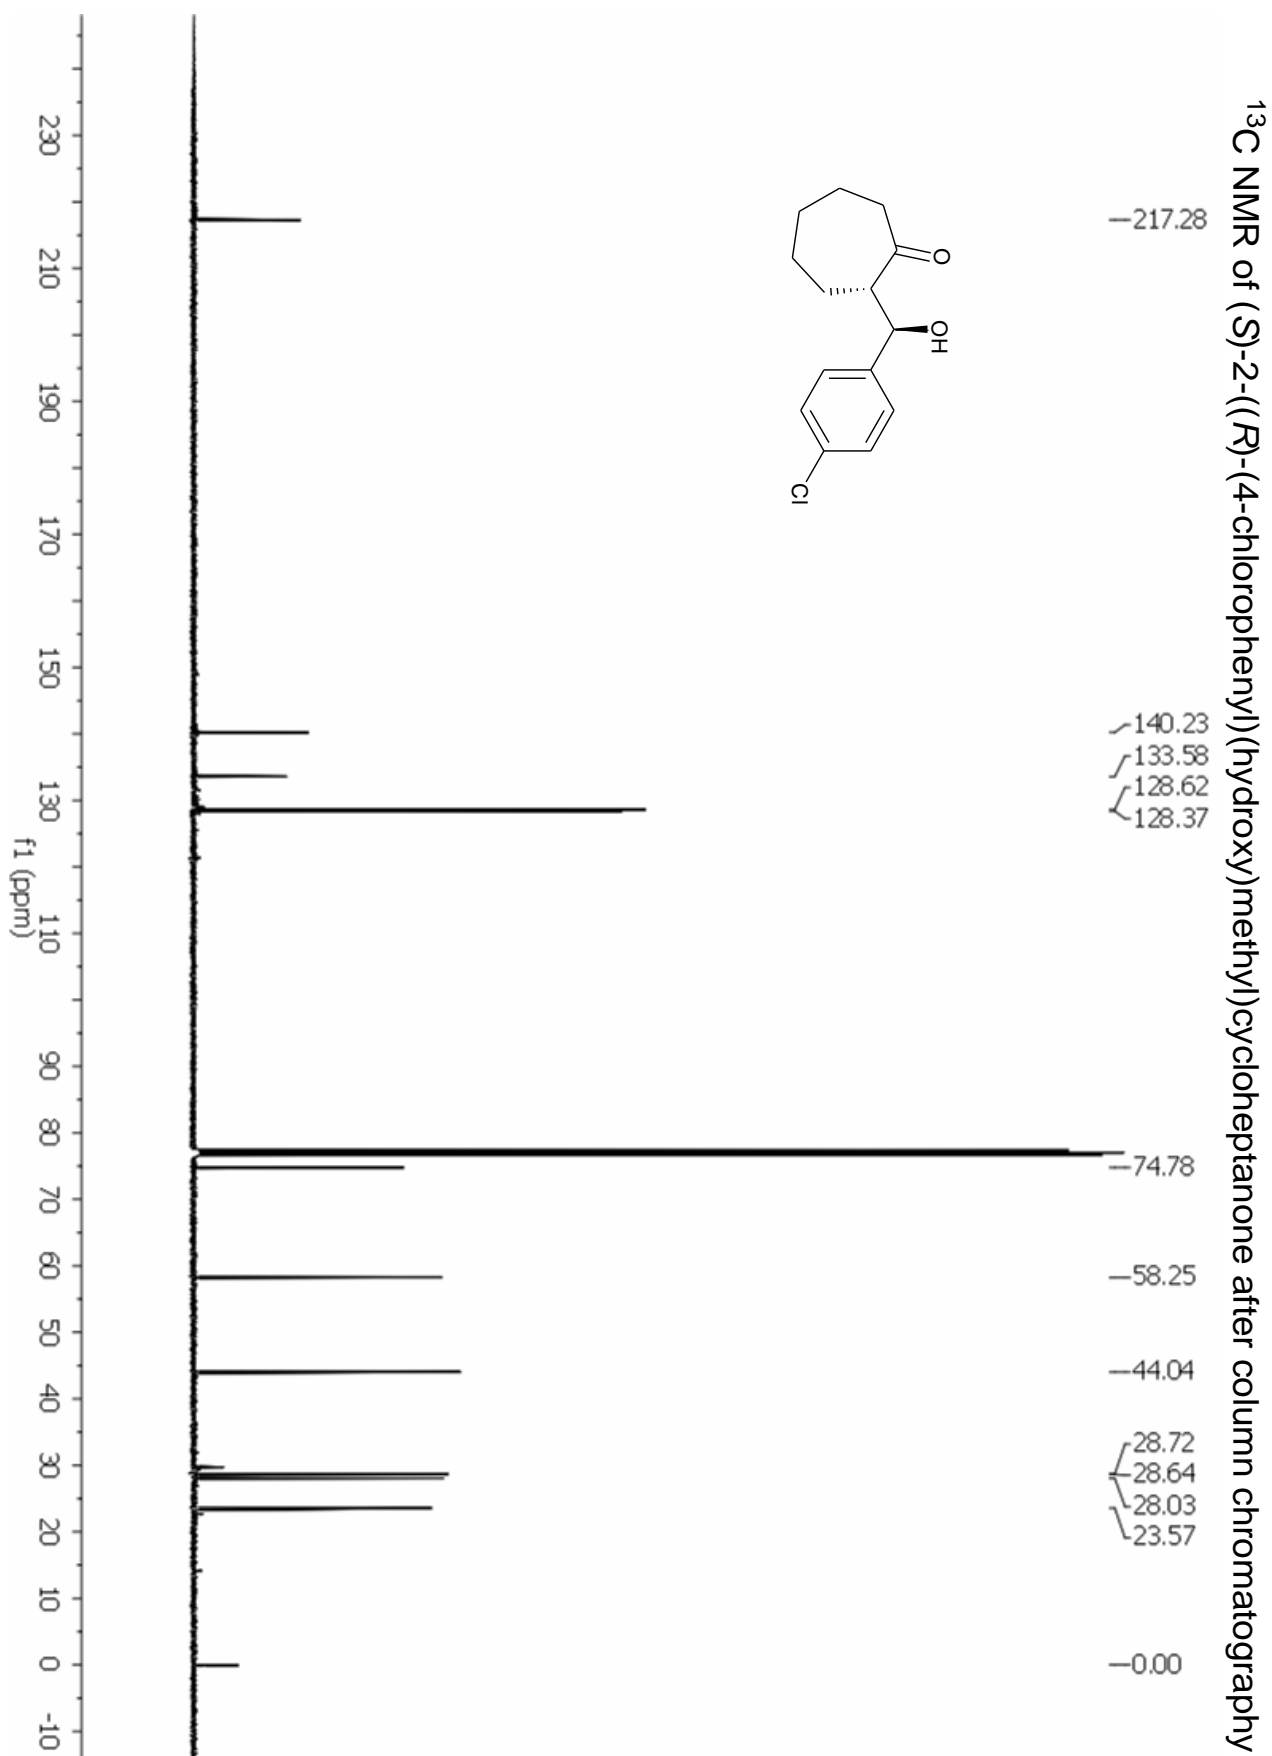

Supplement: c2ob26382c.pdf [file c2ob26382c.pdf]
